# Supplementary material for: Smoking induces coordinated DNA methylation and gene expression changes in adipose tissue with consequences for metabolic health
Source: PubMed Central journal article supplement (PMC6196025; doi:10.1186/s13148-018-0558-0), 2018-10-20

Figure S1

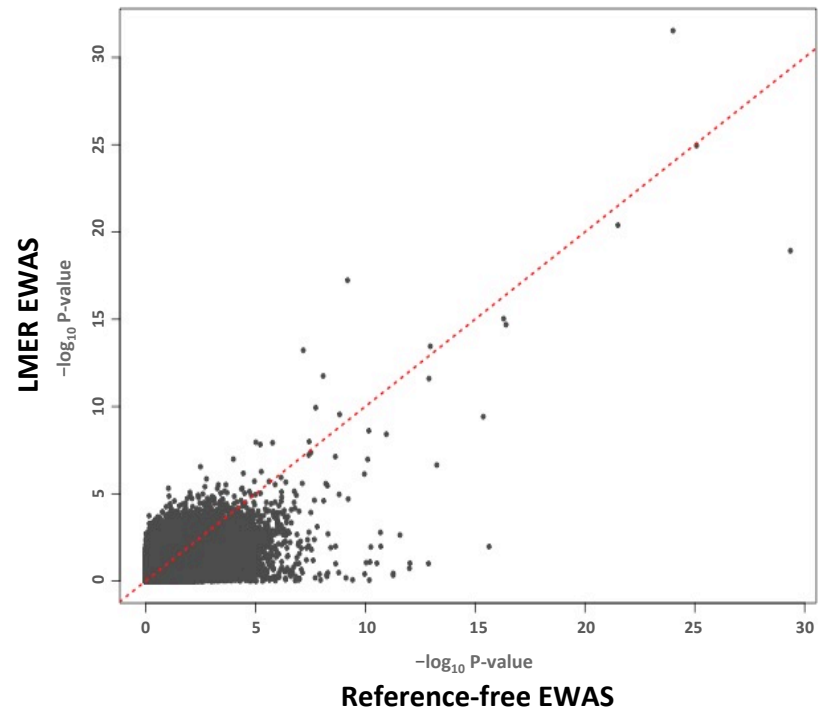

Figure S2

**cg05951221\_2q37.1**  
**P-value = 1.28e-29**

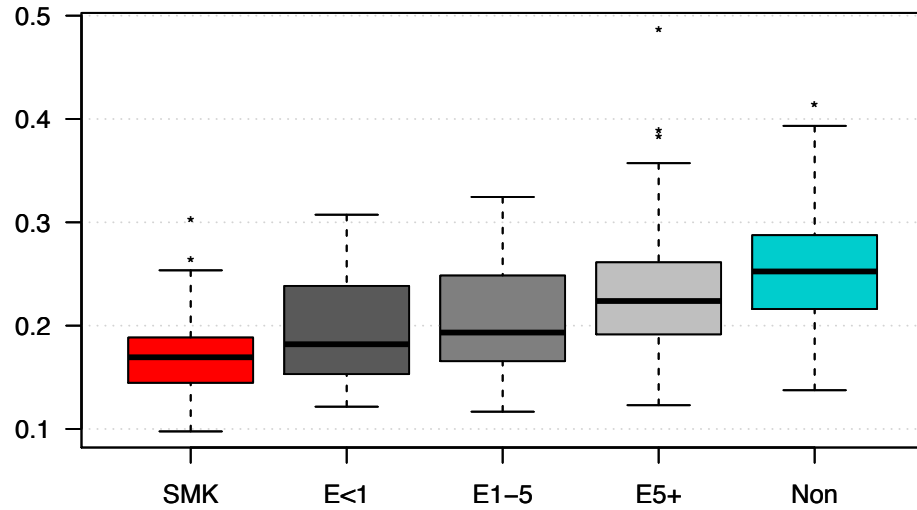

**cg21566642\_2q37.1**  
**P-value = 1.87e-23**

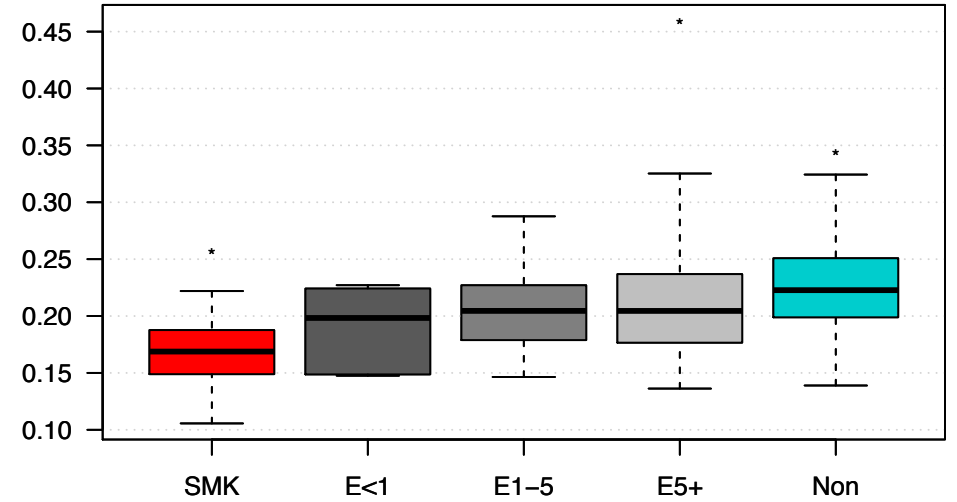

**\*cg23680900\_CYP1A1**  
**P-value = 2.96e-21**

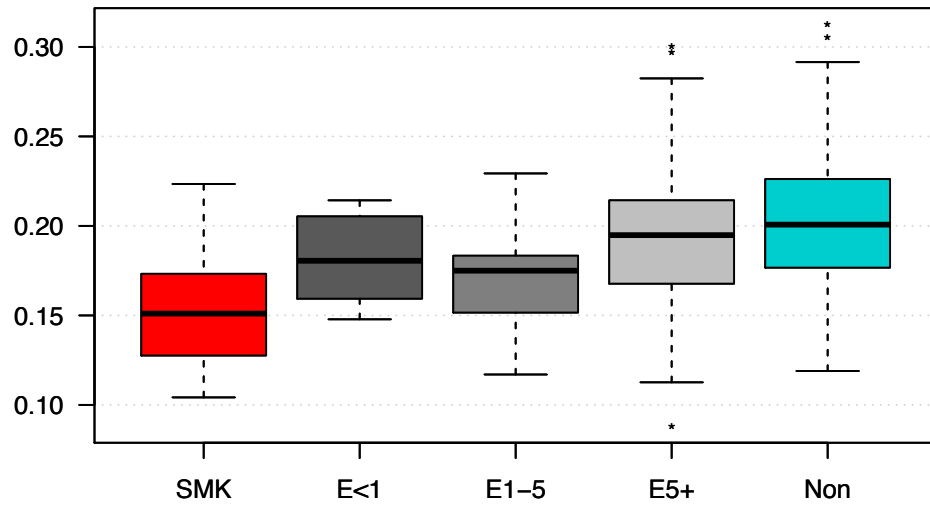

**cg14120703\_NOTCH1**  
**P-value = 1.44e-20**

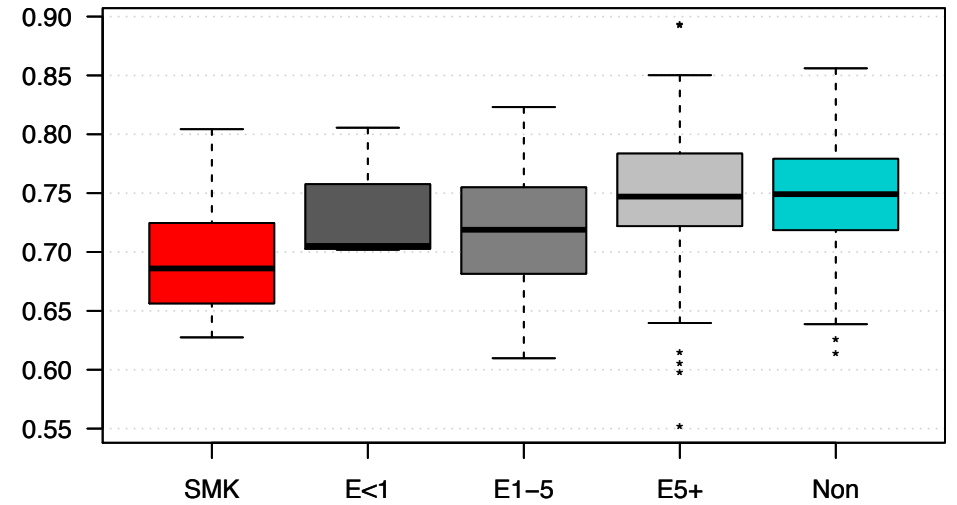

**\*cg26516004\_CYP1A1**  
**P-value = 1.95e-20**

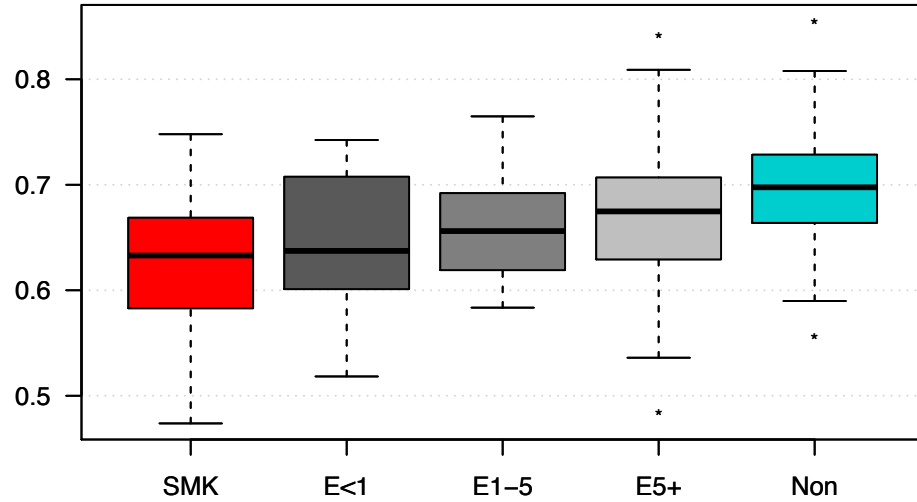

**\*cg10009577\_CYP1A1**  
**P-value = 2.48e-17**

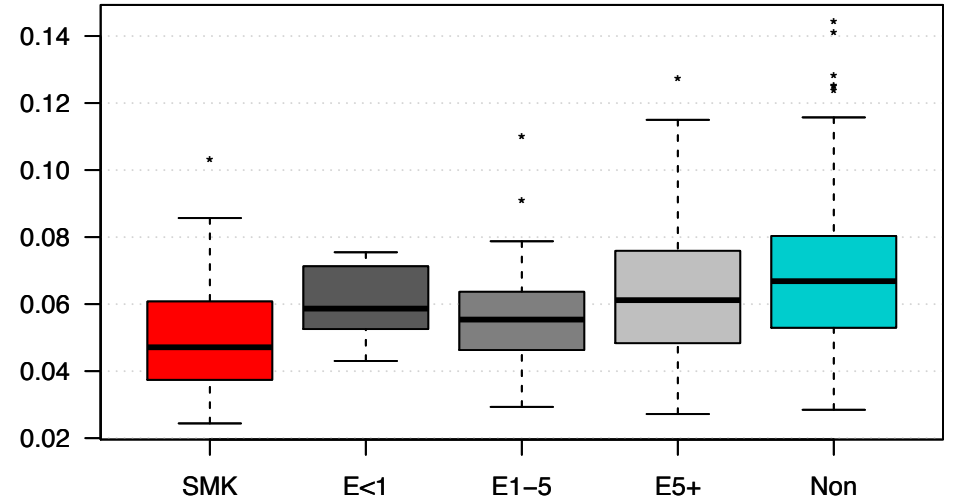

**cg01985595\_PDE7B**  
**P-value = 1.09e-15**

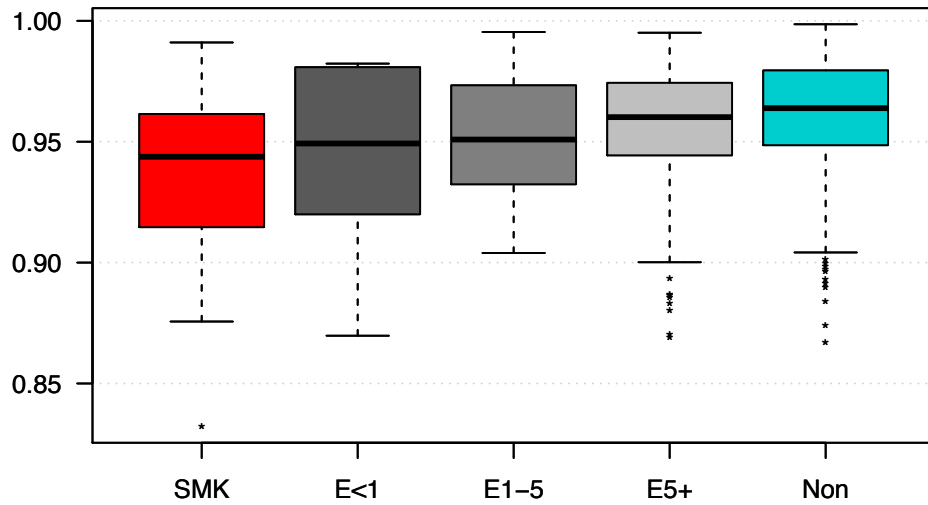

**cg22418620\_NEURL1B**  
**P-value = 1.63e-15**

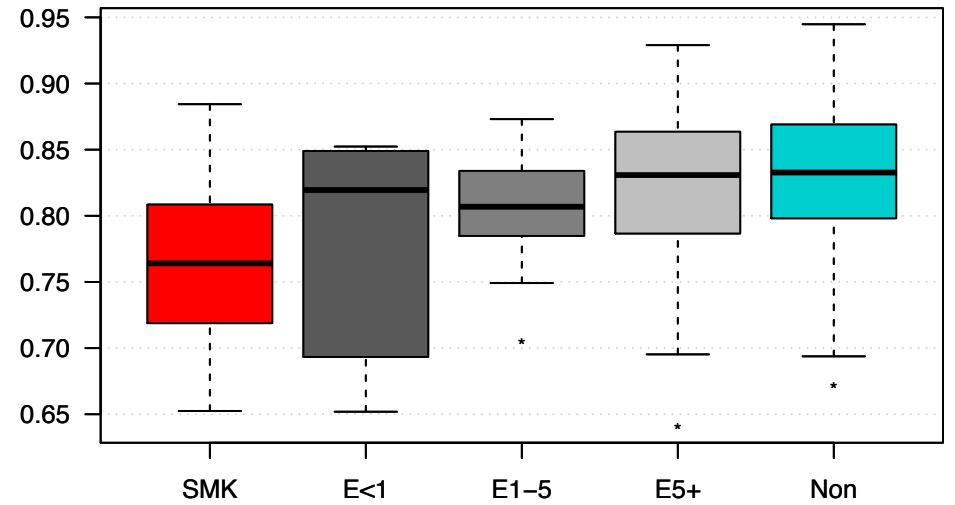

**\*cg23160522\_CYP1A1**  
**P-value = 1.33e-14**

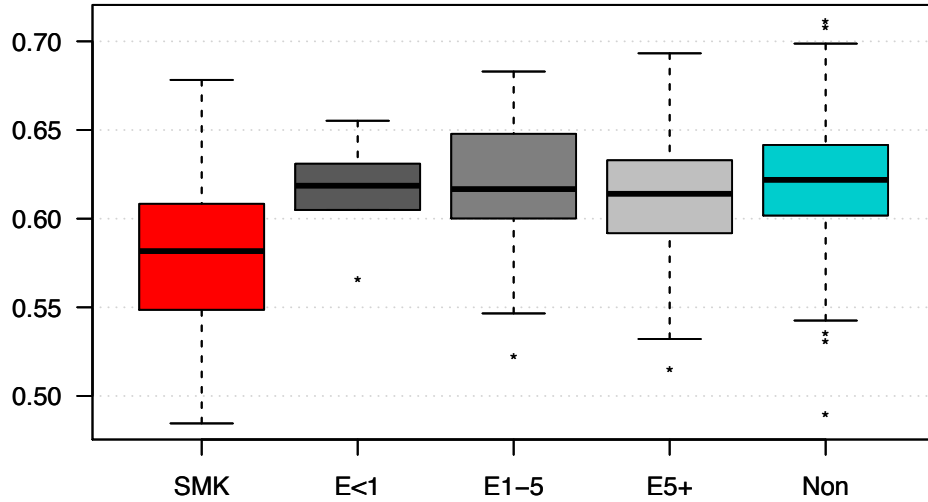

**\*cg03636183\_F2RL3**  
**P-value = 1.80e-14**

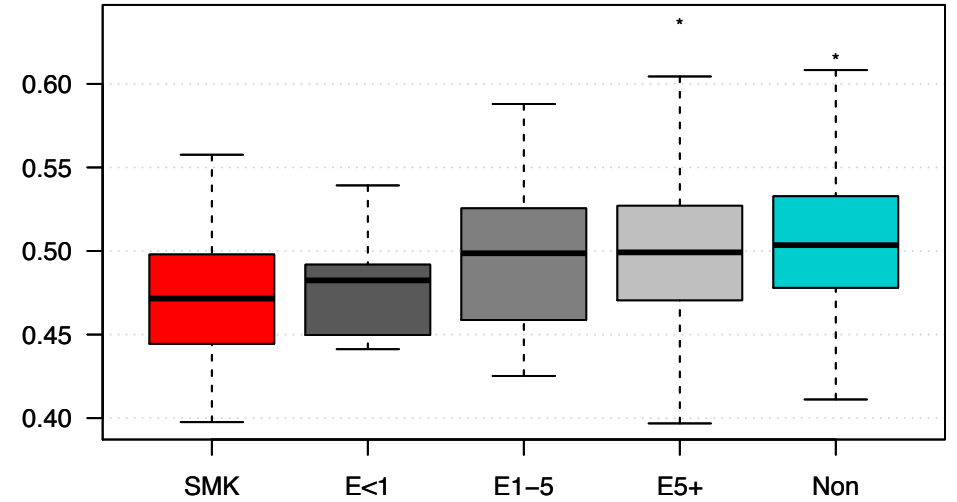

**cg07992500\_CDC42EP3**  
**P-value = 1.88e-13**

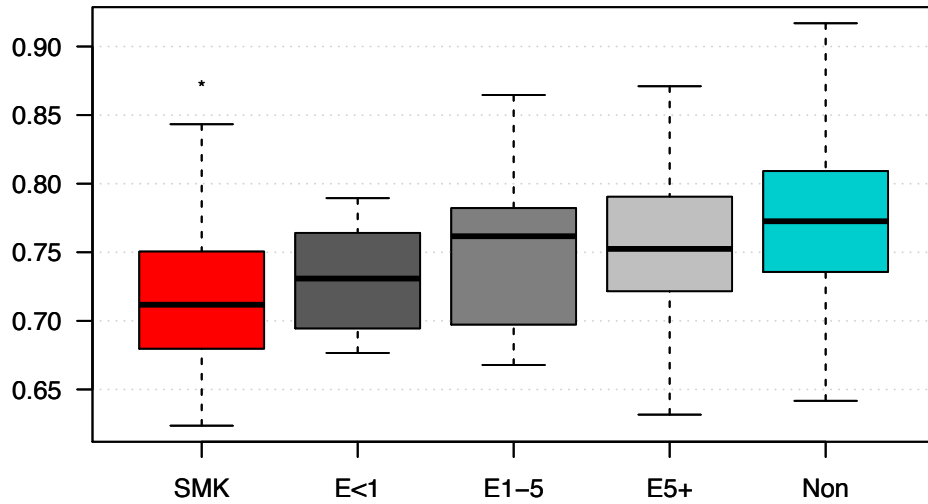

**cg12531611\_NEDD9**  
**P-value = 1.12e-11**

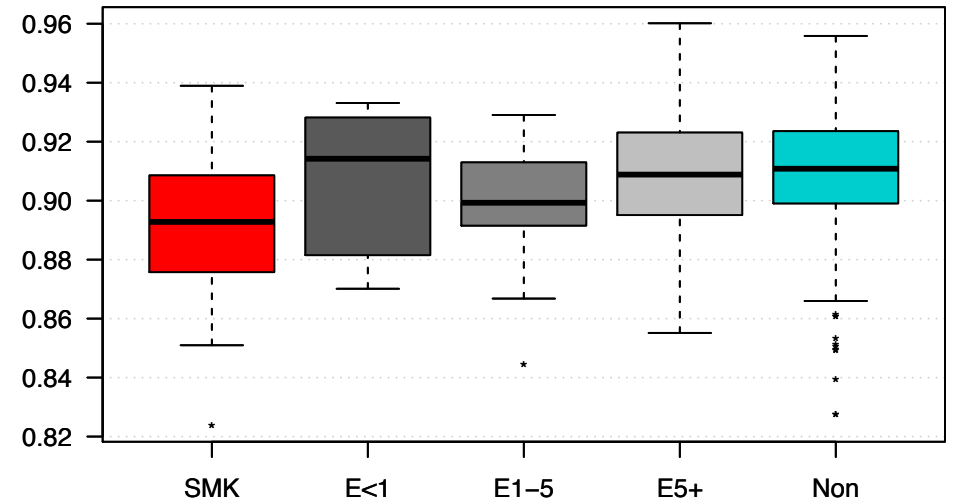

**cg03646542\_NEURL1B**  
P-value = 1.87e-10

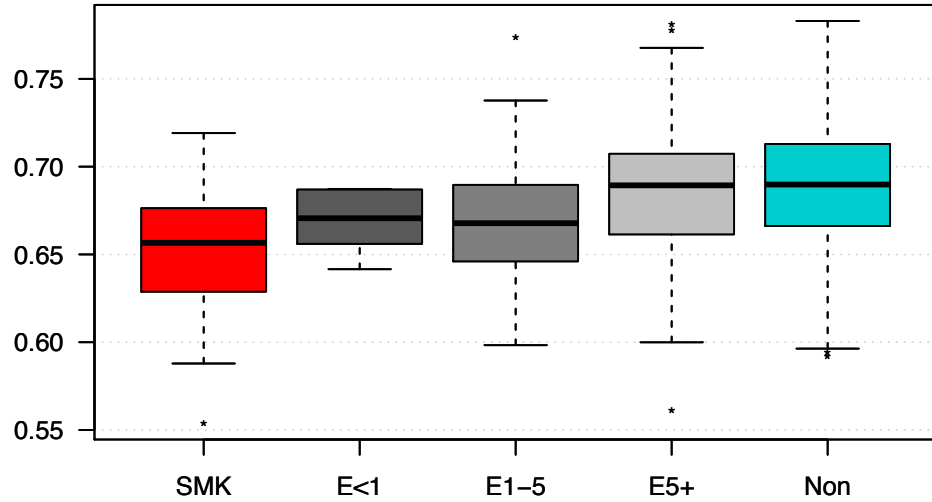

**\* cg00353139\_CYP1A1**  
P-value = 4.47e-10

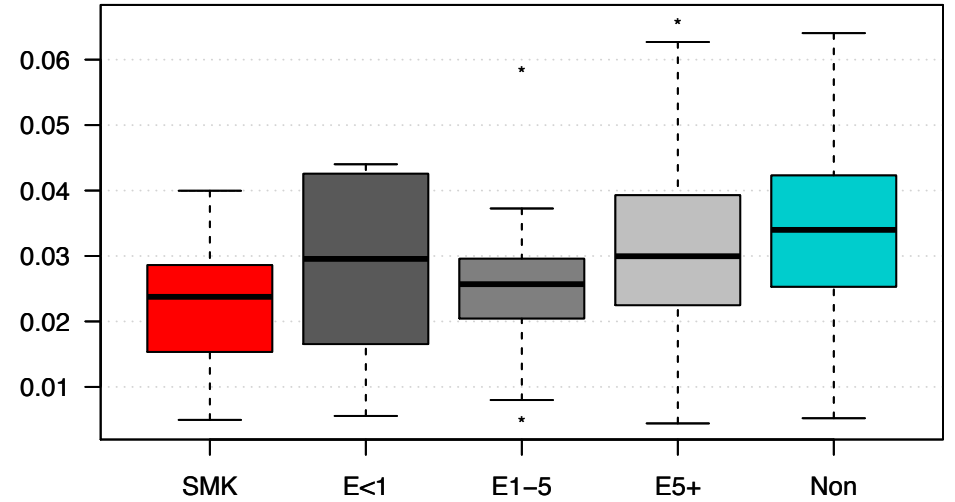

**cg21124714\_P2RY6**  
P-value = 5.15e-10

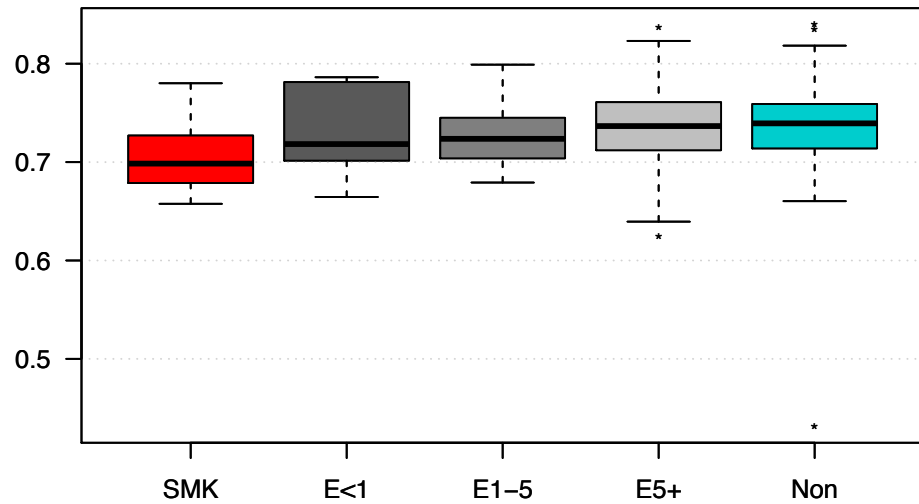

**cg01940273\_2q37.1**  
P-value = 8.93e-10

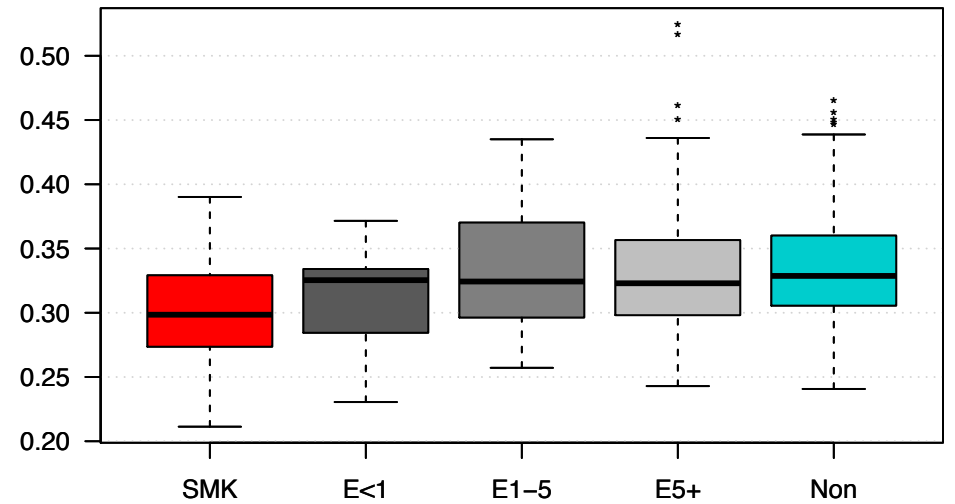

**\* cg25648203\_AHRR**  
**P-value = 1.30e-9**

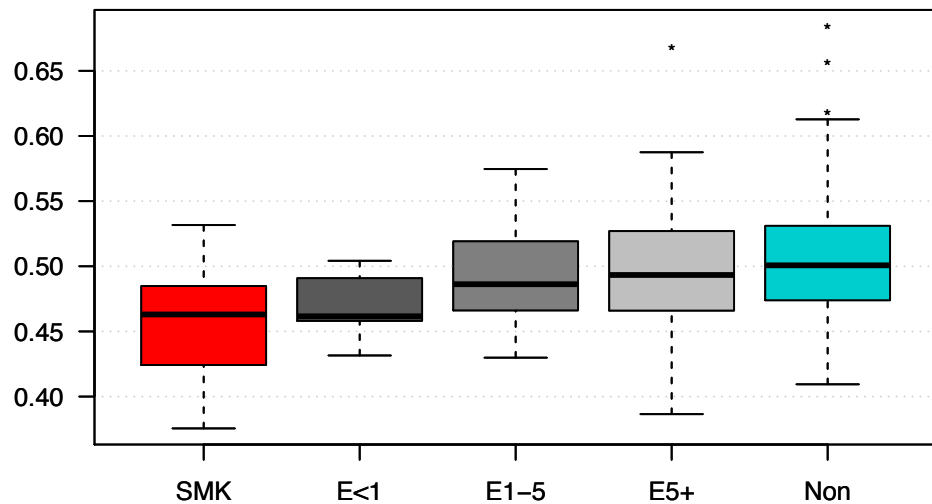

**\* cg20408276\_CYP1B1**  
**P-value = 1.61e-9**

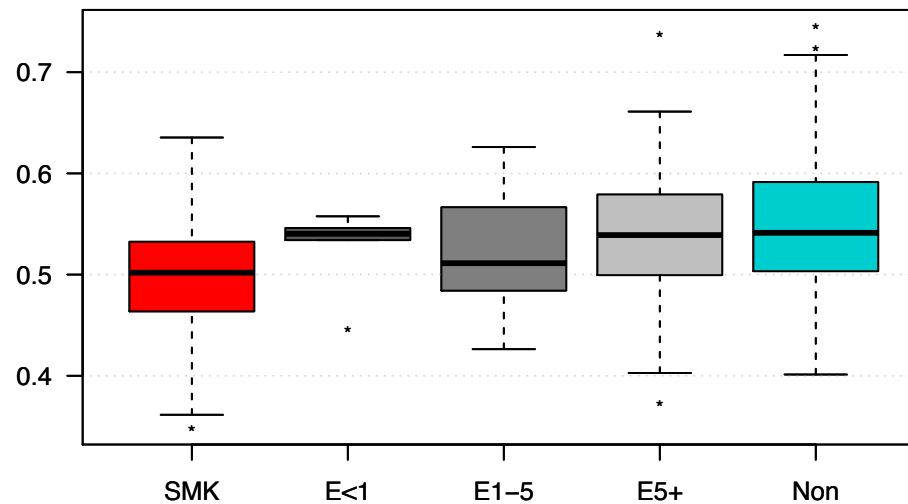

**cg20131897\_ACVRL1**  
**P-value = 5.61e-9**

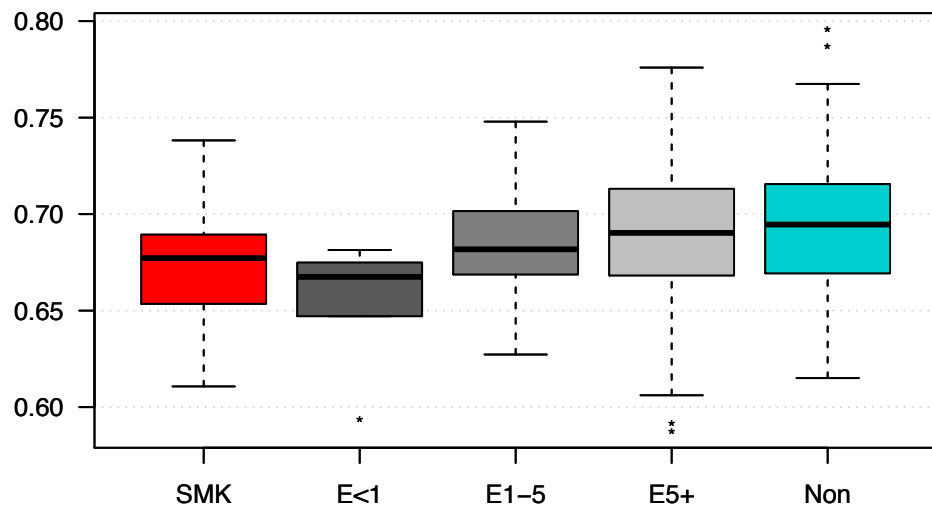

**cg21611682\_LRP5**  
**P-value = 8.10e-9**

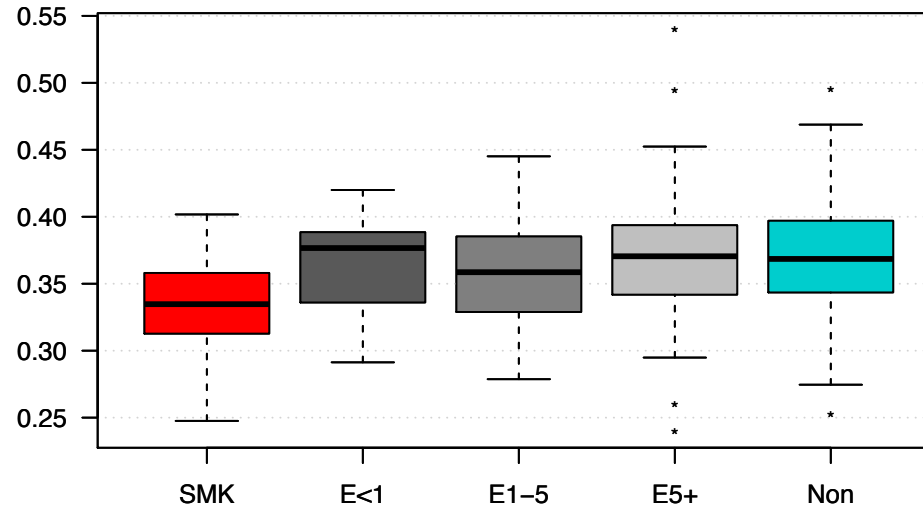

**\* cg19405895\_AHRR**  
P-value = 8.38e-9

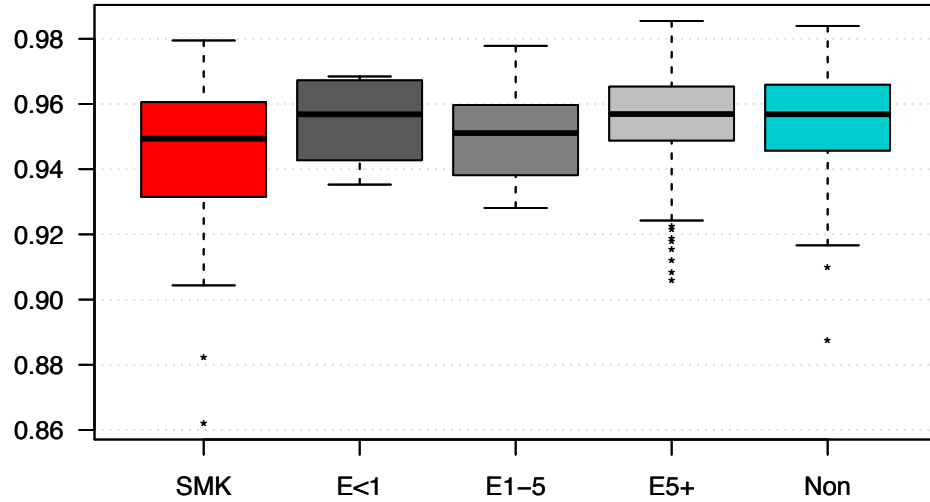

**\* cg05575921\_AHRR**  
P-value = 1.07e-8

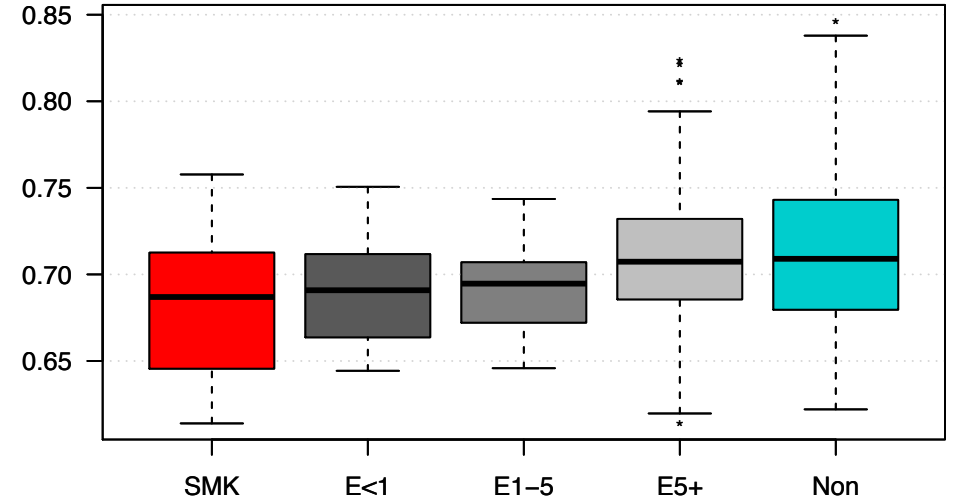

**cg13531977\_EPB41L4B**  
P-value = 1.14e-8

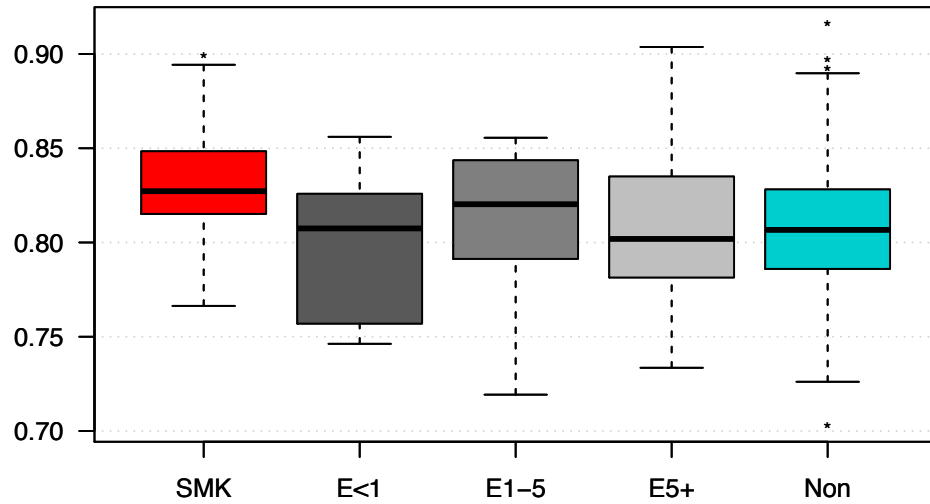

**\* cg00512031\_CYTL1**  
P-value = 1.23e-8

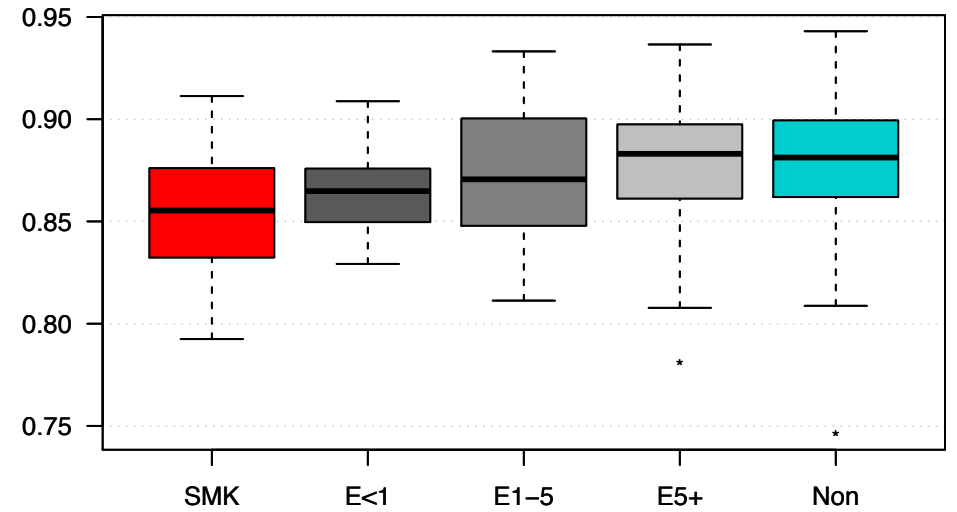

**cg25189904\_GNG12**  
P-value = 1.48e-8

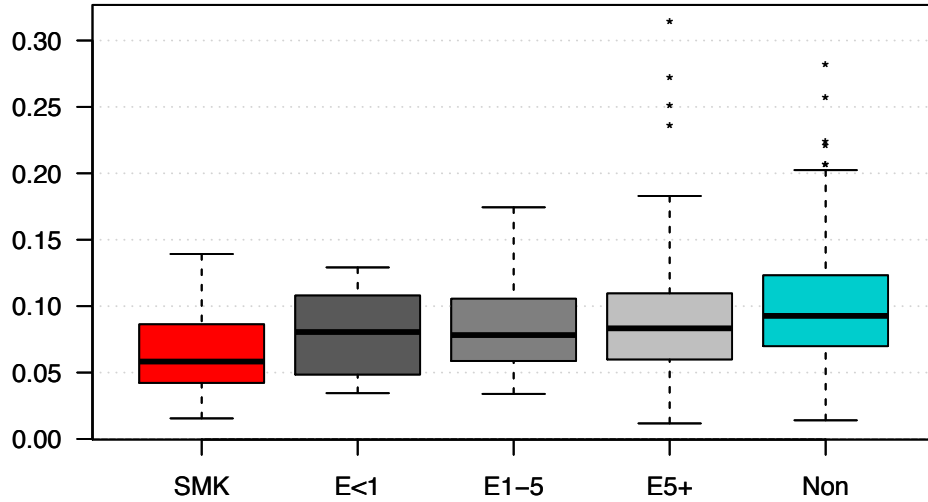

**cg00378510\_LINGO3**  
P-value = 1.53e-8

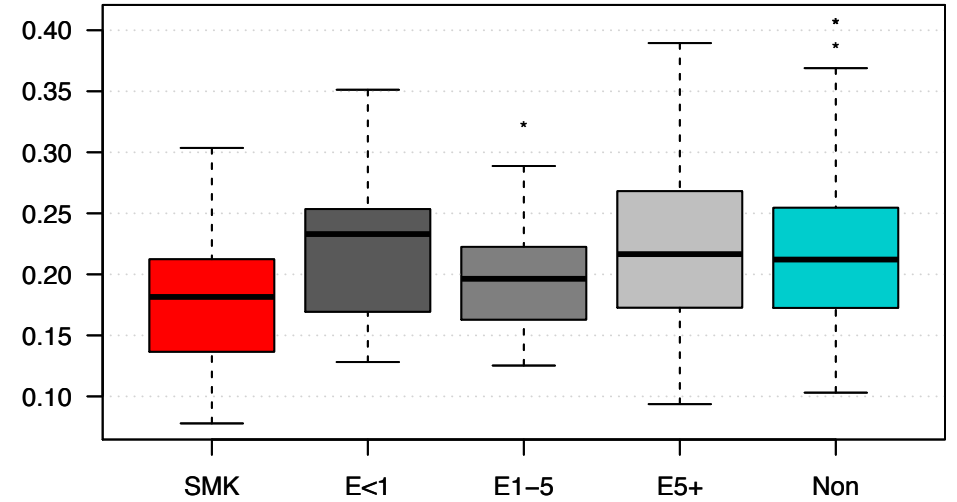

**\* cg11554391\_AHRR**  
P-value = 2.00e-8

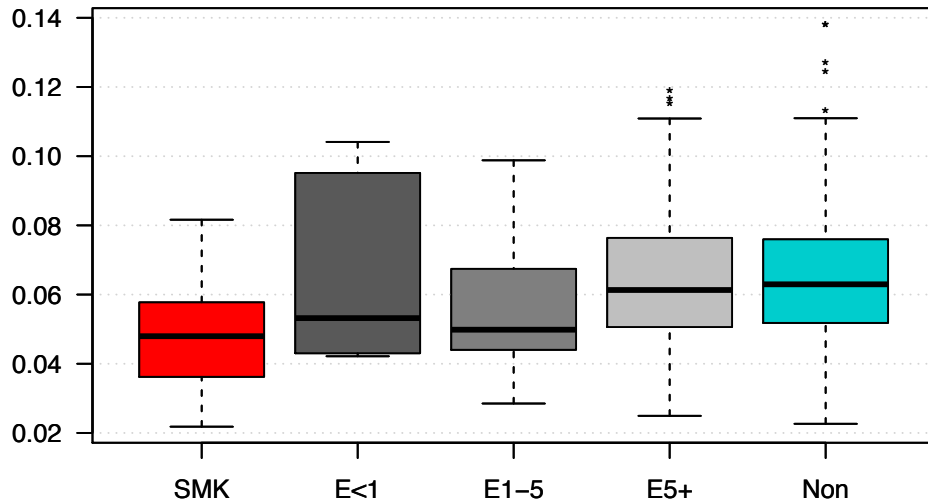

**cg01802380\_FAM155A**  
P-value = 5.69e-8

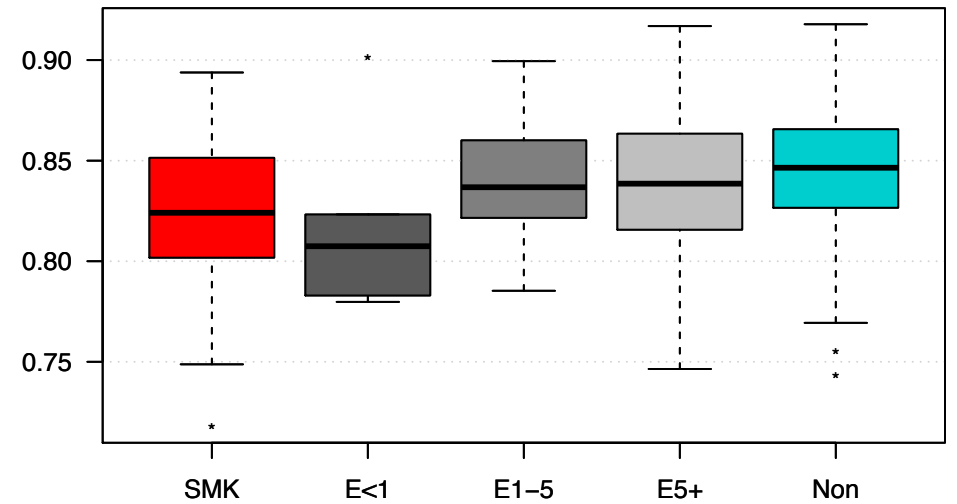



**cg14179389\_GFI1**  
P-value = 1.07e-7

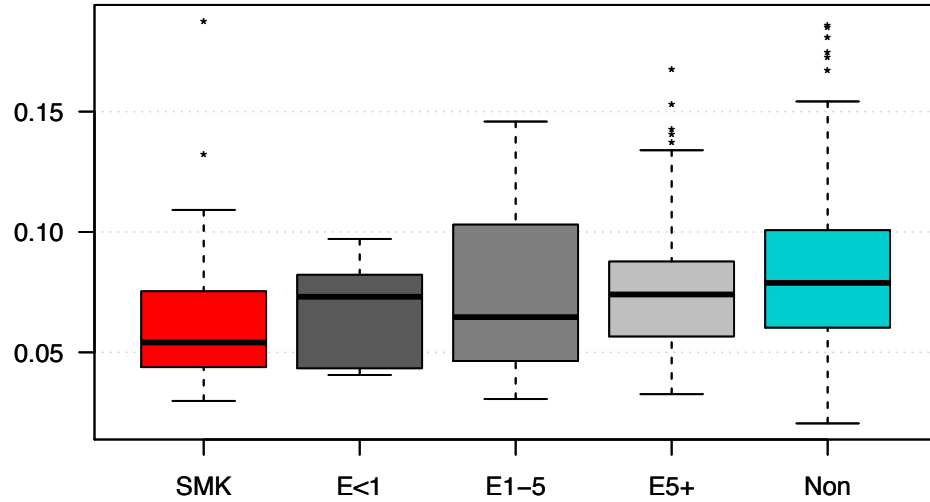

**cg06644428\_2q37.1**  
P-value = 1.61e-7

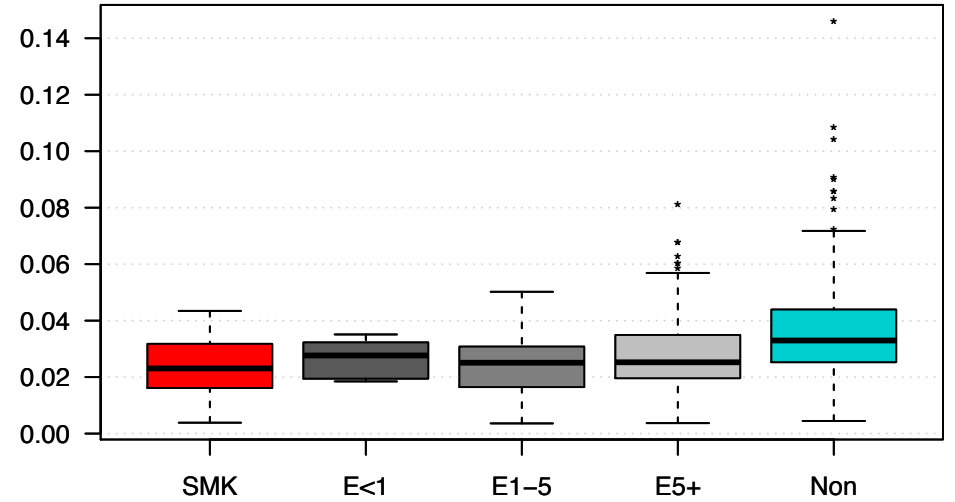

**cg12081267\_TMEM131**  
P-value = 1.97e-7

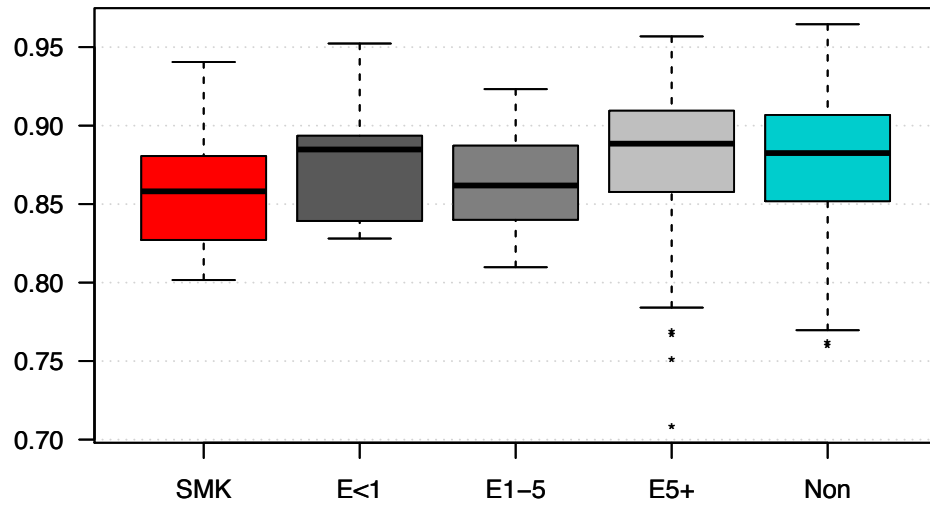

**\* cg02162897\_CYP1B1**  
P-value = 2.89e-7

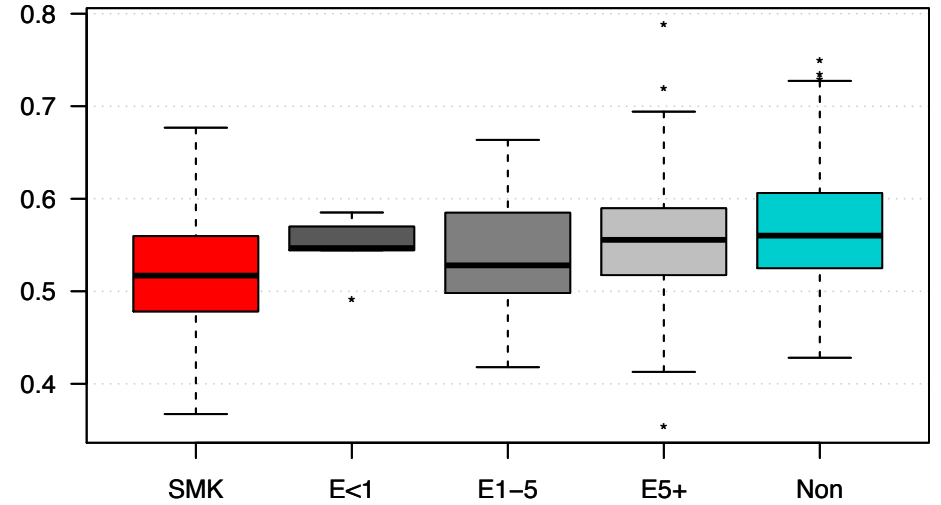

**cg1155067\_INPP4A**  
P-value = 3.18e-7

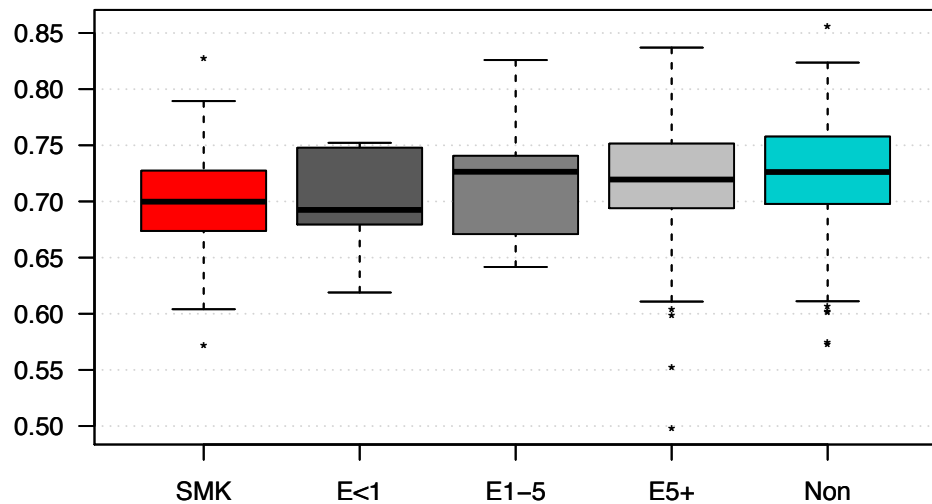

**cg04134818\_FLJ41603**  
P-value = 3.26e-7

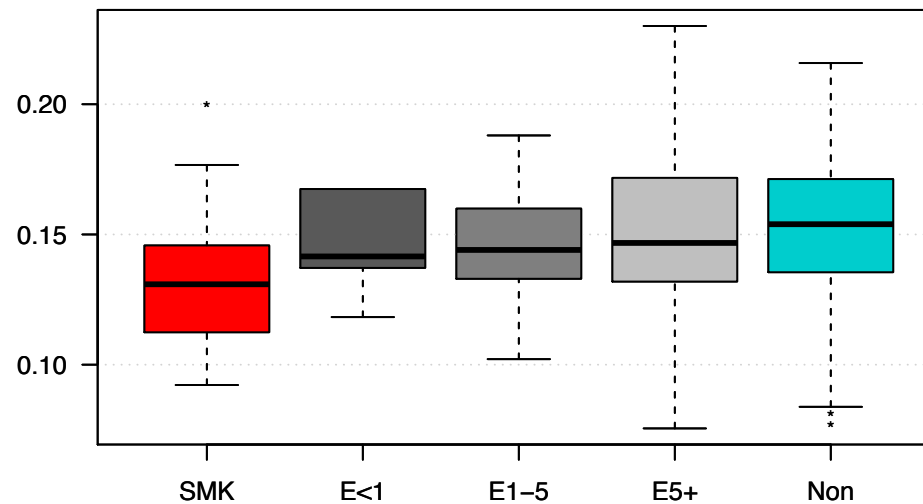

**cg03976650\_KCTD12**  
P-value = 3.56e-7

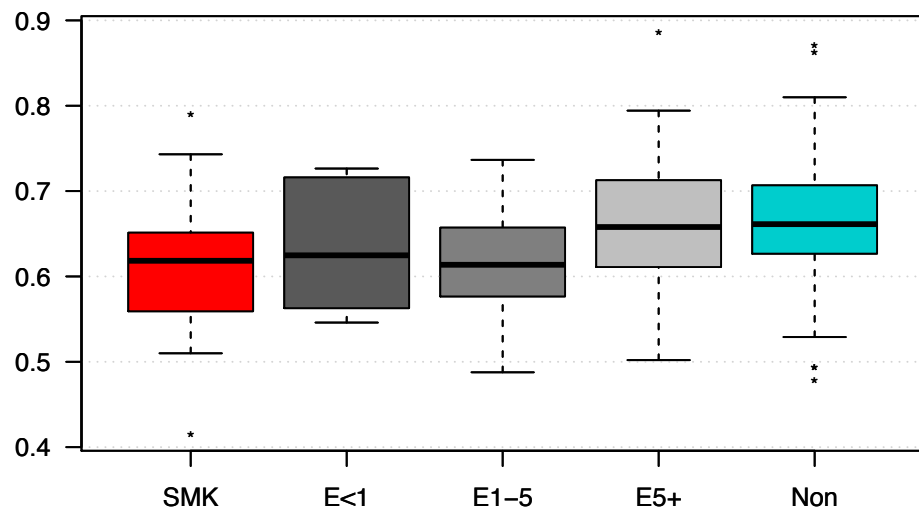

**cg22851561\_C14orf43**  
P-value = 3.92e-7

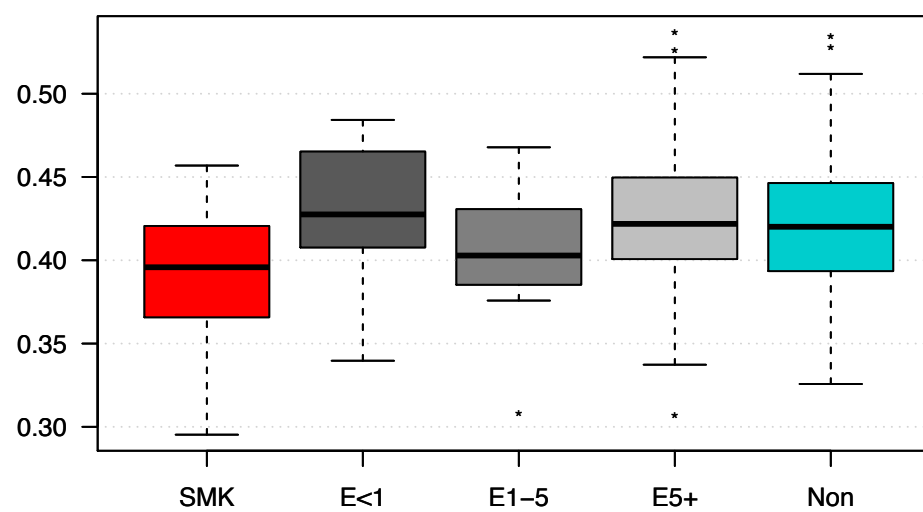

**cg10376100\_LYST;MIR1537**  
P-value = 4.03e-7

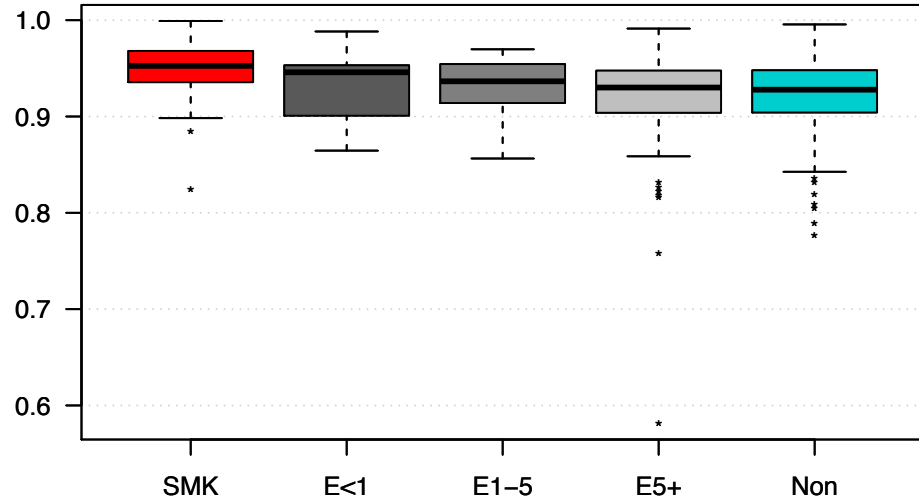

**cg04063216\_FAM84A**  
P-value = 4.39e-7

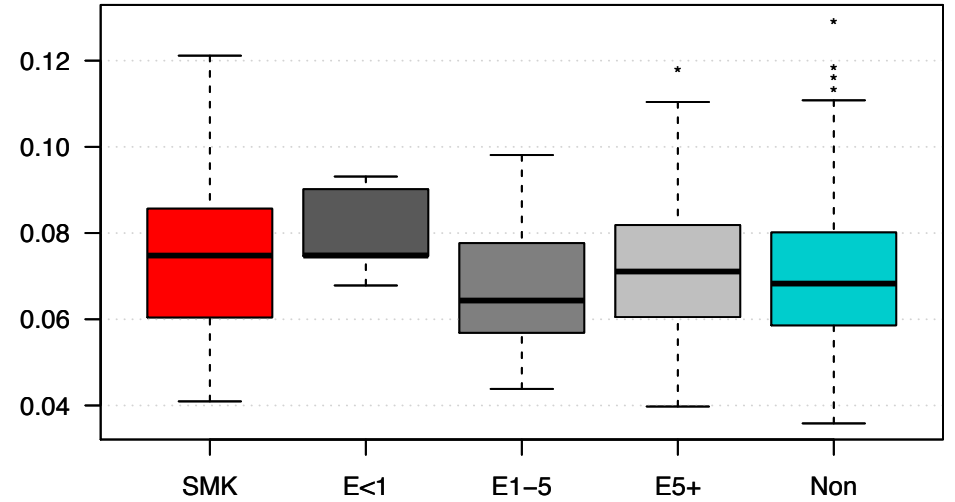

**cg16320419\_BHLHE40**  
P-value = 4.88e-7

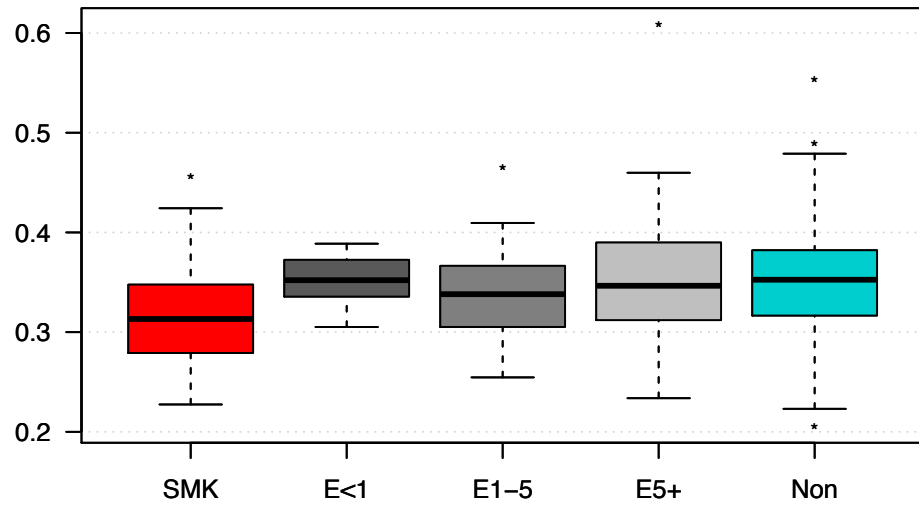

**\*cg04135110\_AHRR**  
P-value = 5.34e-7

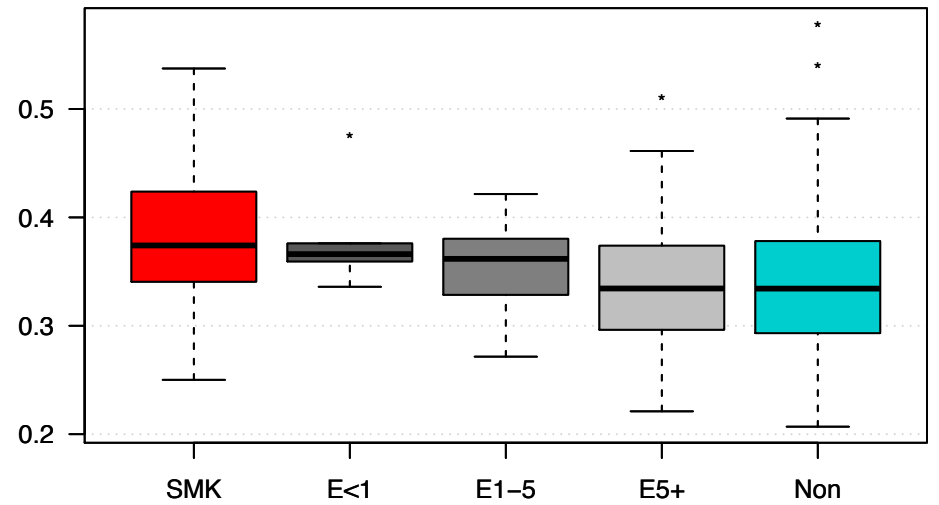

**cg20109054\_C6orf48;SNORD52**  
P-value =  $7.85e-7$

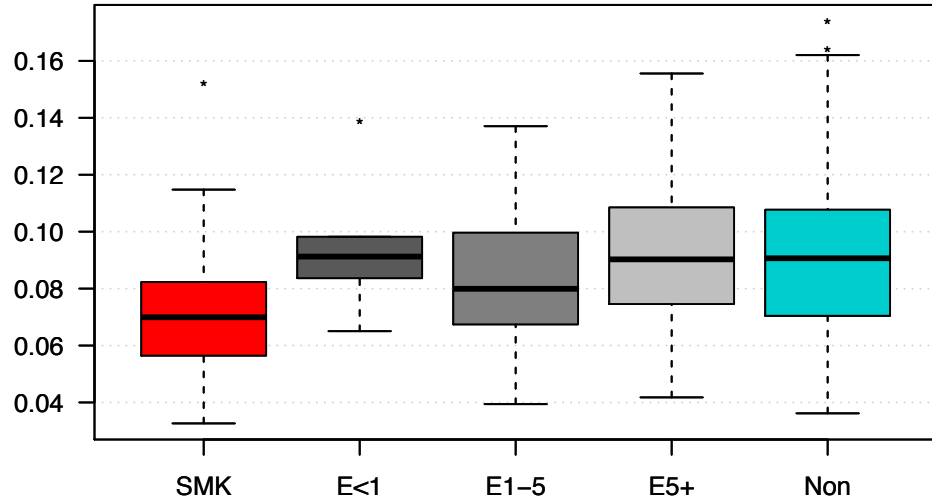

**cg16721845\_MTL5**  
P-value =  $8.37e-7$

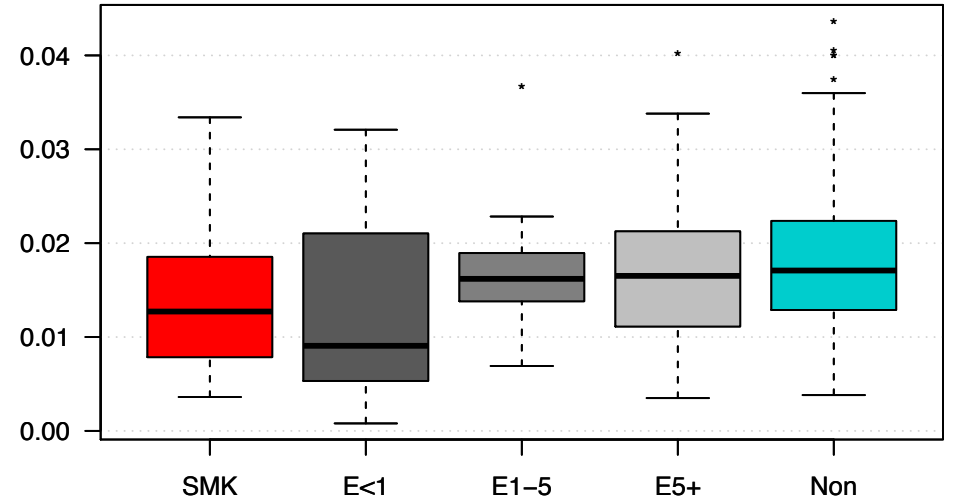

Figure S3

**\* ENSG00000140465.7\_CYP1A1**  
**P-value = 5.37e-51**

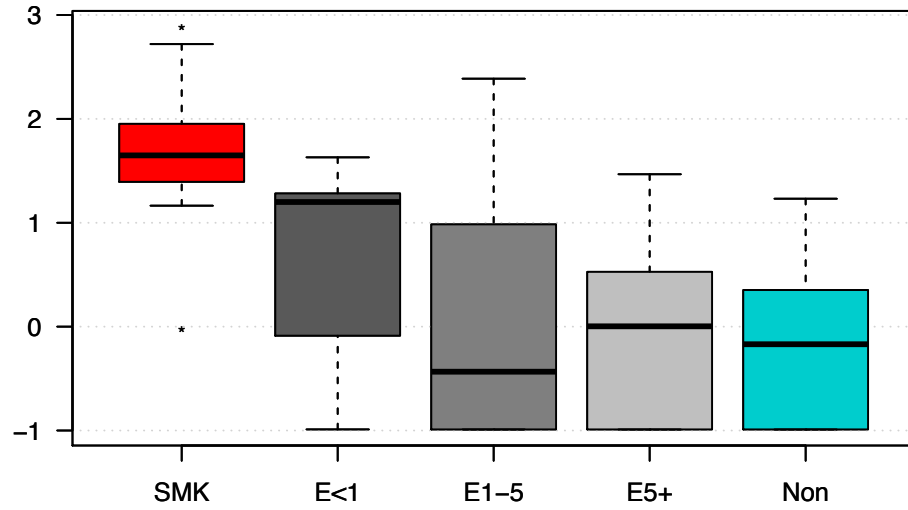

**\* ENSG00000138061.7\_CYP1B1**  
**P-value = 2.83e-21**

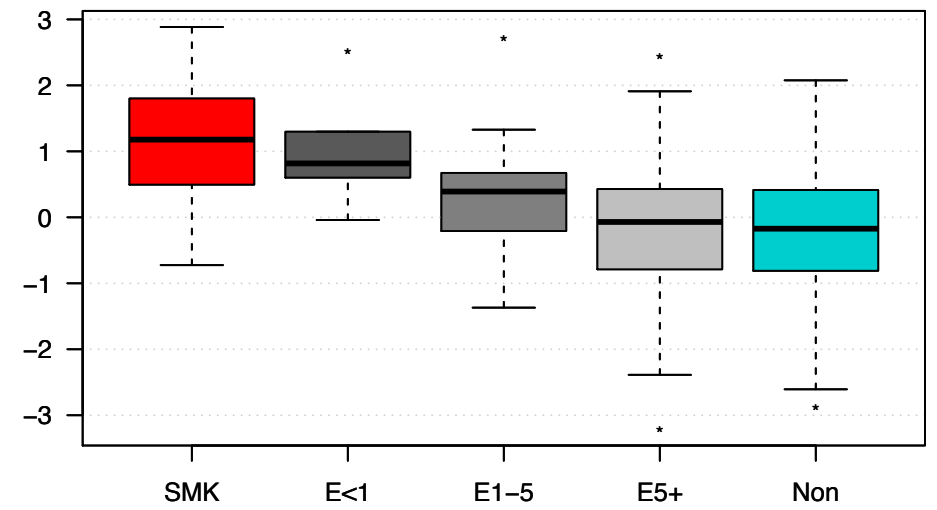

**ENSG00000144331.14\_ZNF385B**  
**P-value = 1.53e-18**

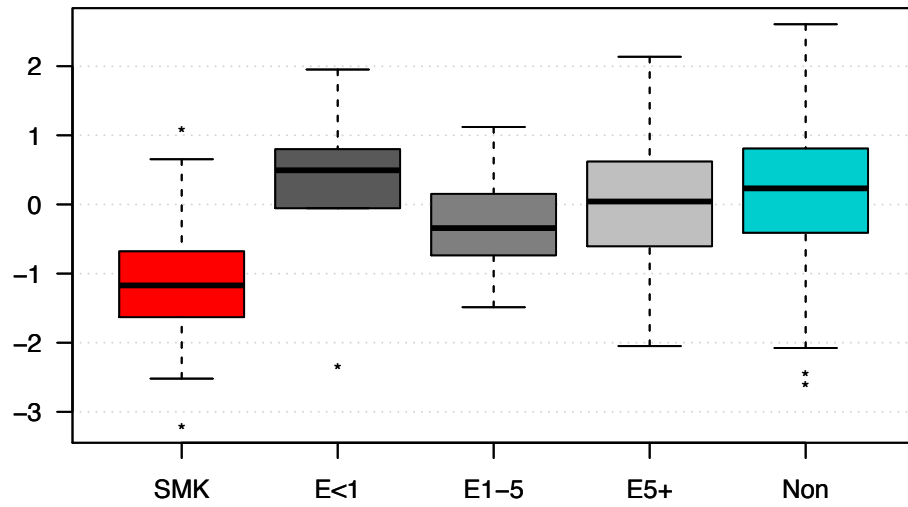

**ENSG00000179151.6\_EDC3**  
**P-value = 3.10e-17**

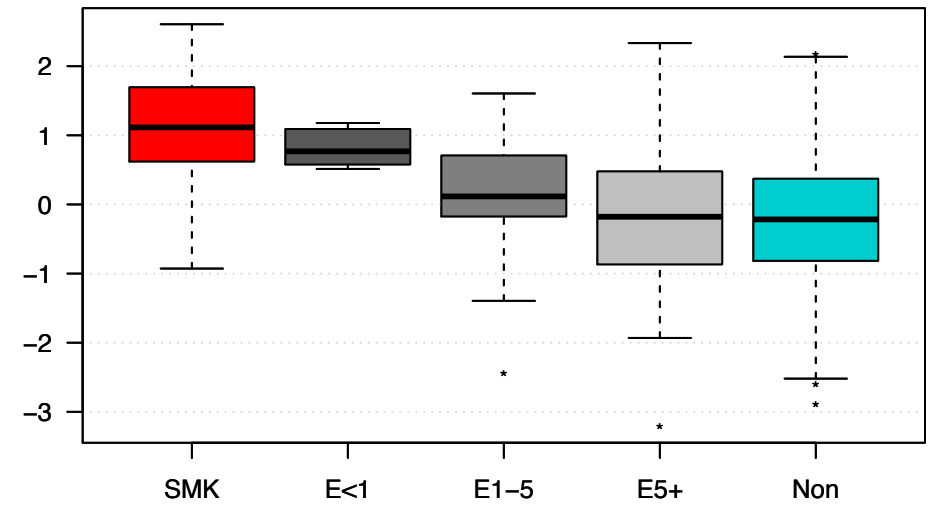

**\*ENSG0000063438.12\_AHRR**  
P-value = 6.03e-12

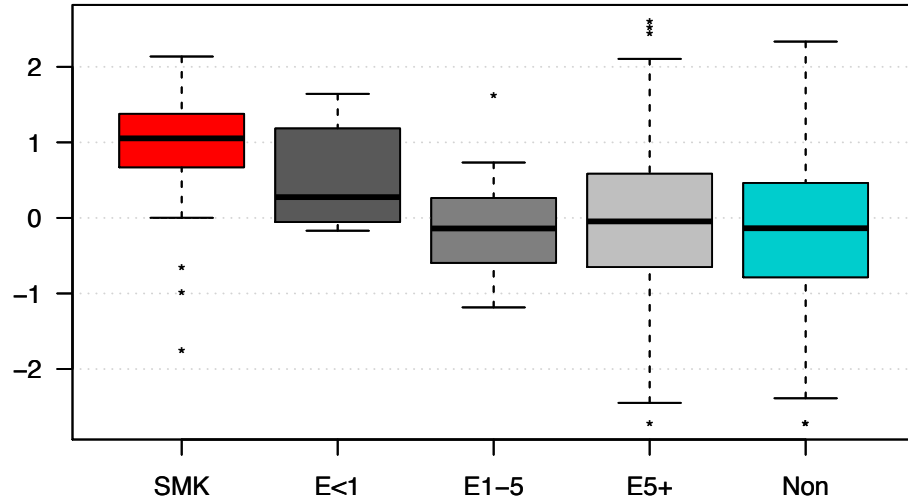

**ENSG00000175267.8\_VWA3A**  
P-value = 2.18e-10

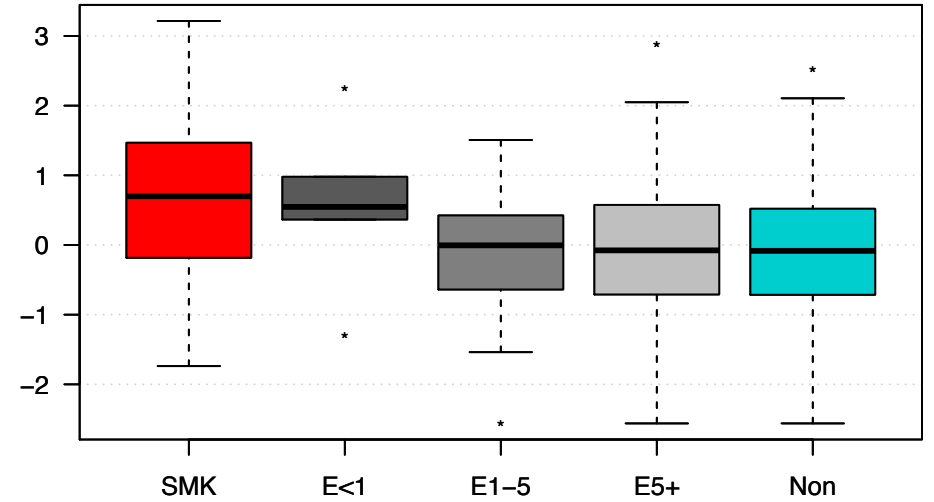

**ENSG00000170381.7\_SEMA3E**  
P-value = 8.35e-09

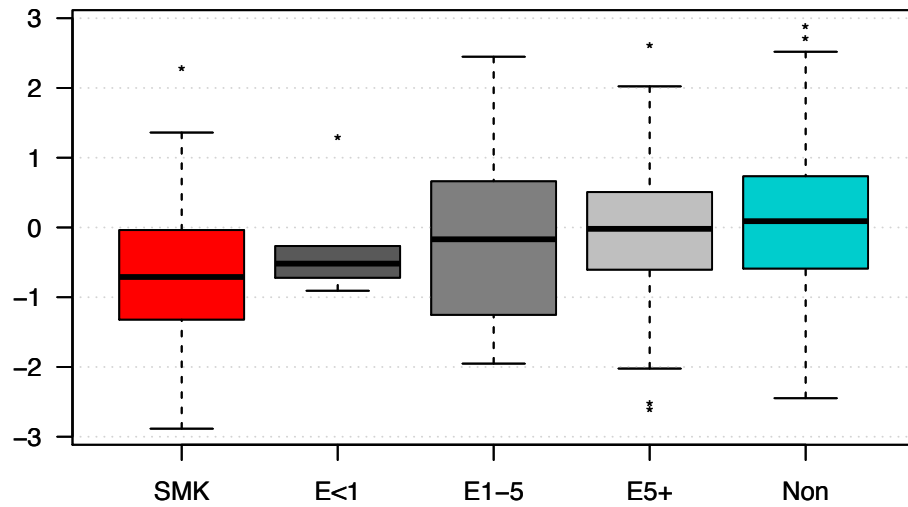

**\*ENSG00000170891.6\_CYTL1**  
P-value = 2.82e-08

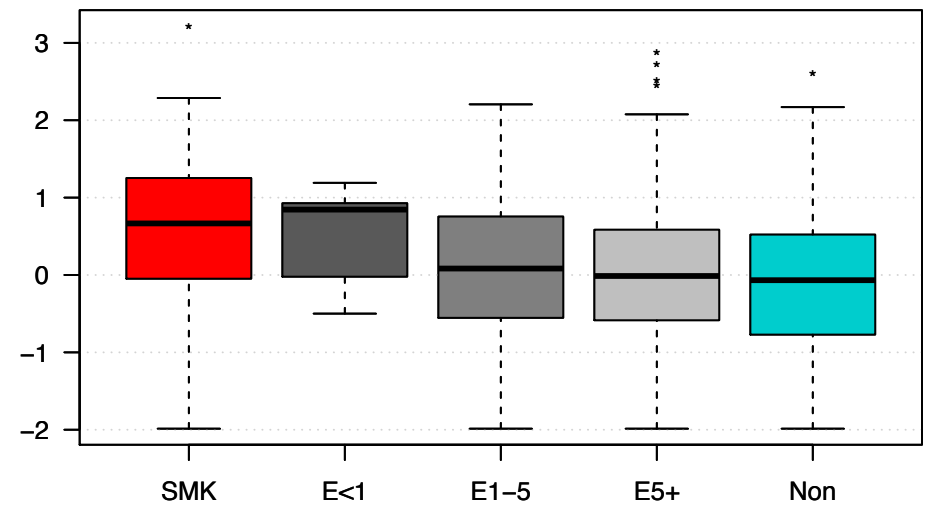

**ENSG00000187486.5\_KCNJ11**  
P-value = 3.27e-08

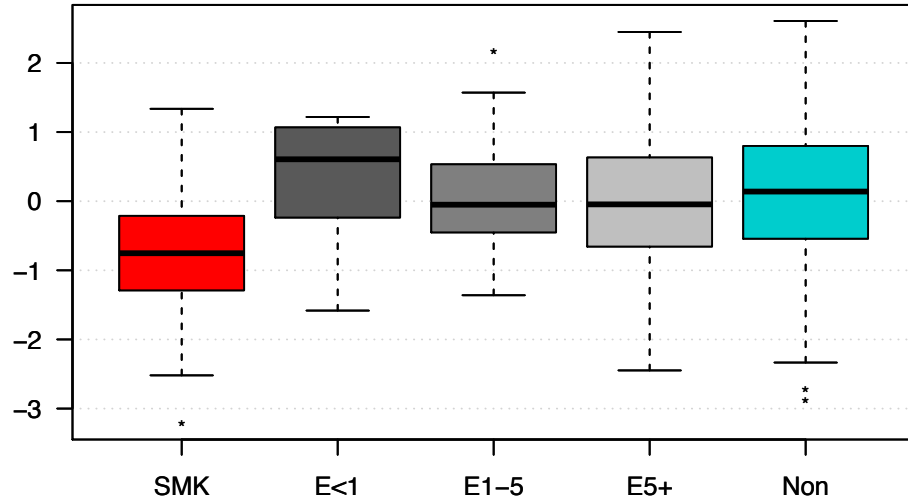

**ENSG00000168280.11\_KIF5C**  
P-value = 4.74e-08

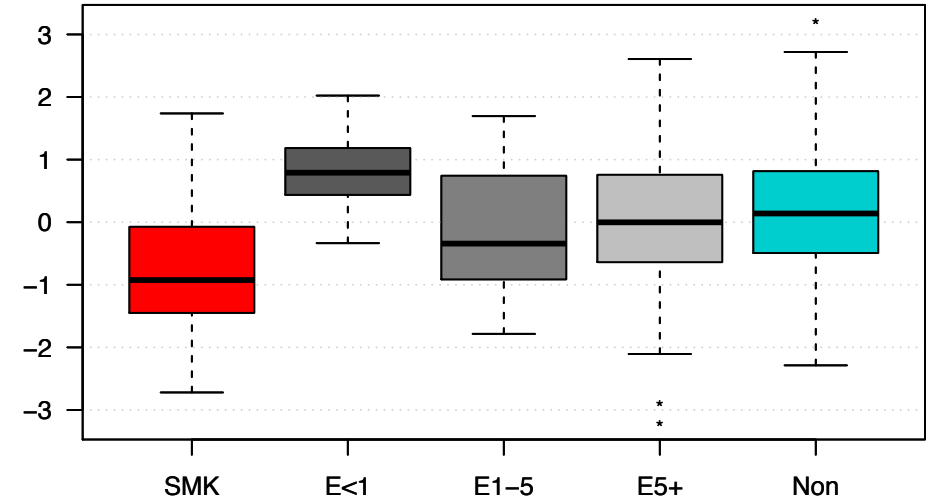

**ENSG0000006016.5\_CRLF1**  
P-value = 2.53e-07

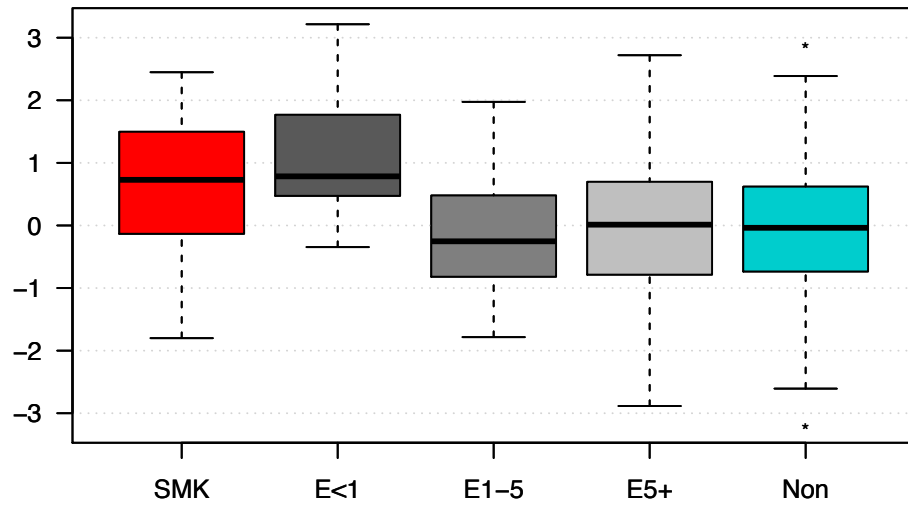

**\* ENSG00000127533.2\_F2RL3**  
P-value = 2.89e-07

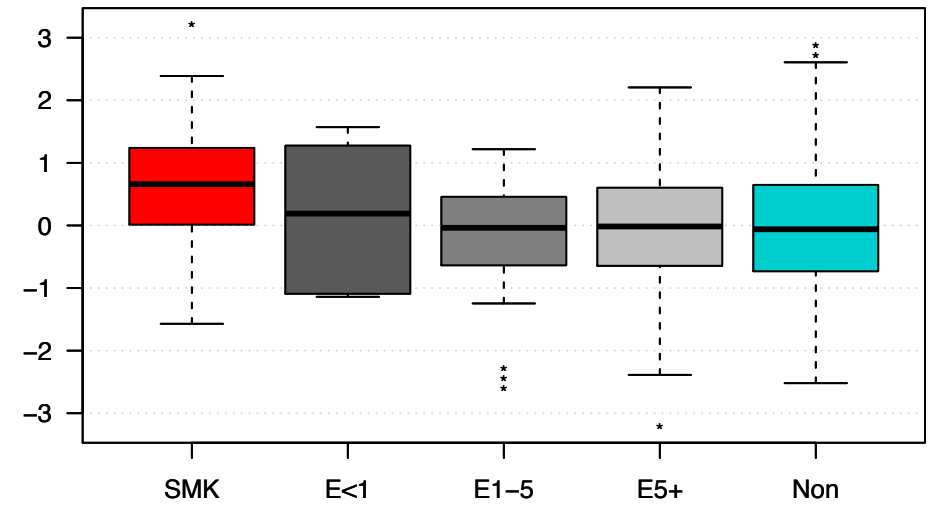

**ENSG00000149294.11\_NCAM1**  
P-value = 3.03e-07

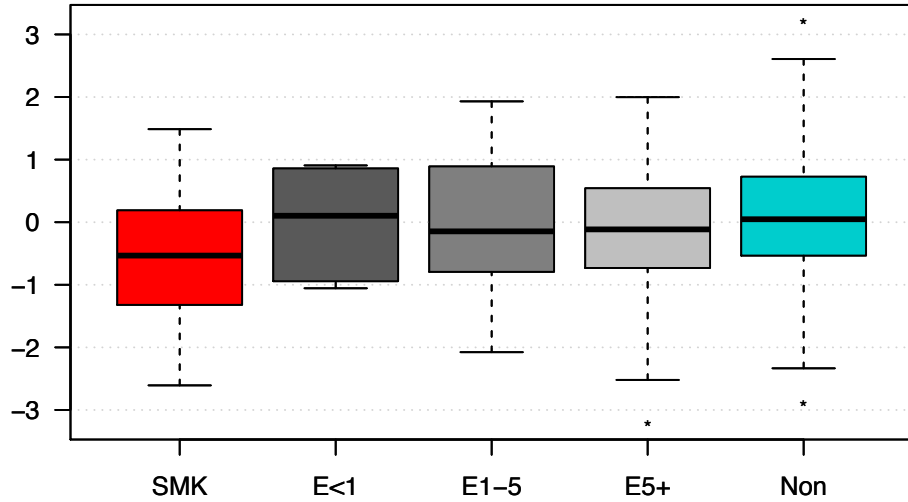

**ENSG00000120693.9\_SMAD9**  
P-value = 4.76e-07

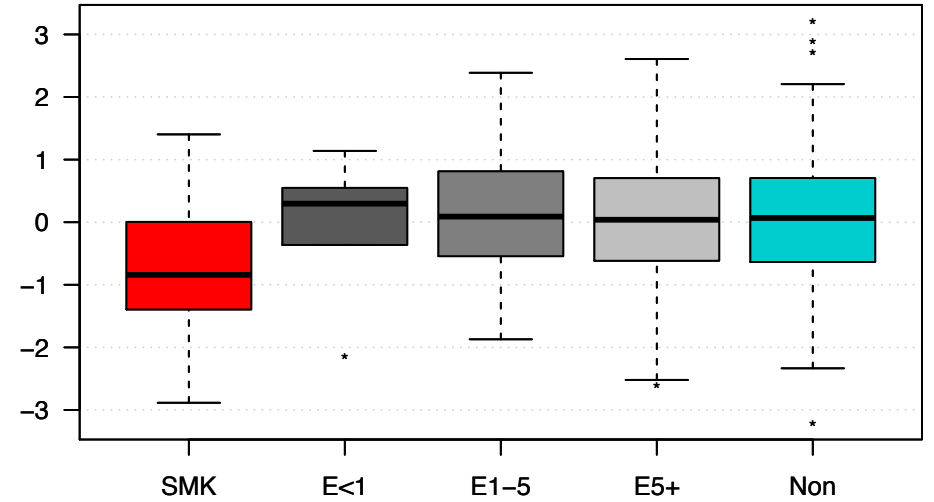

**ENSG00000169116.7\_PARM1**  
P-value = 6.76e-07

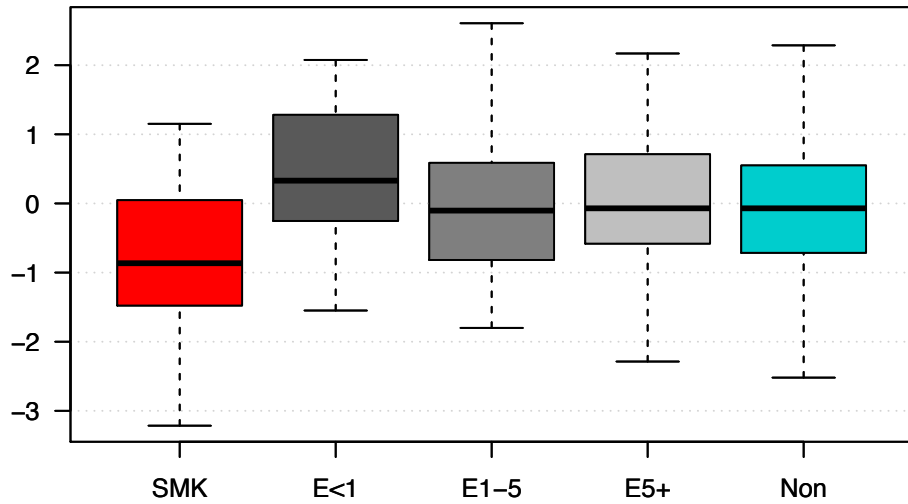

**ENSG00000154330.6\_PGM5**  
P-value = 1.72e-06

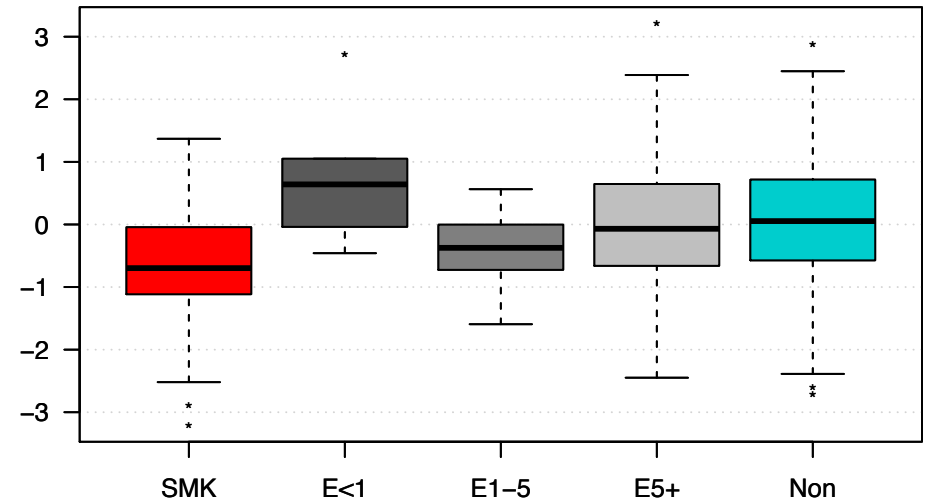



**ENSG00000162430.12\_SEPN1**  
P-value = 1.82e-06

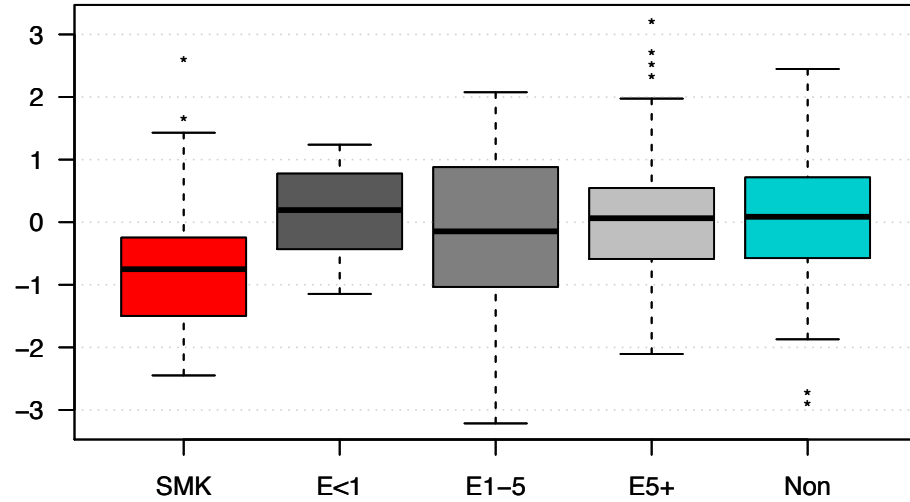

**ENSG00000154721.9\_JAM2**  
P-value = 2.23e-06

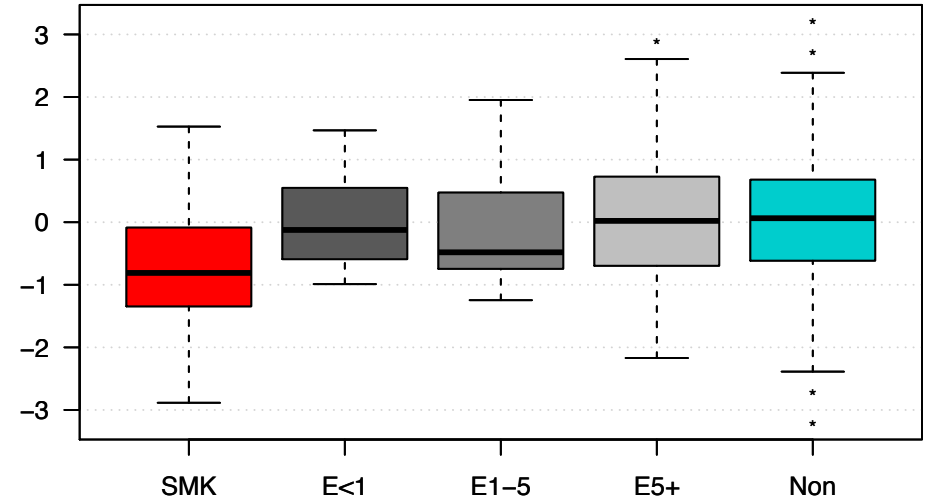

**ENSG00000177303.4\_CASKIN2**  
P-value = 2.90e-06

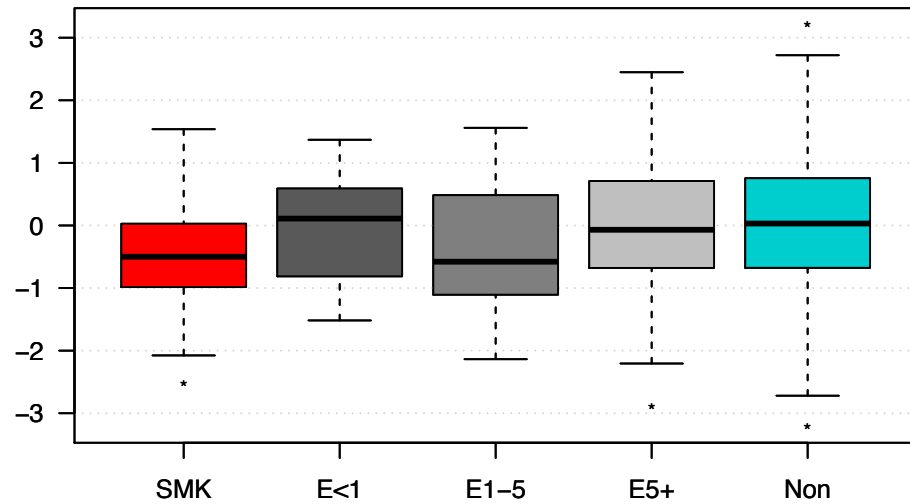

**ENSG00000157404.10\_KIT**  
P-value = 3.31e-06

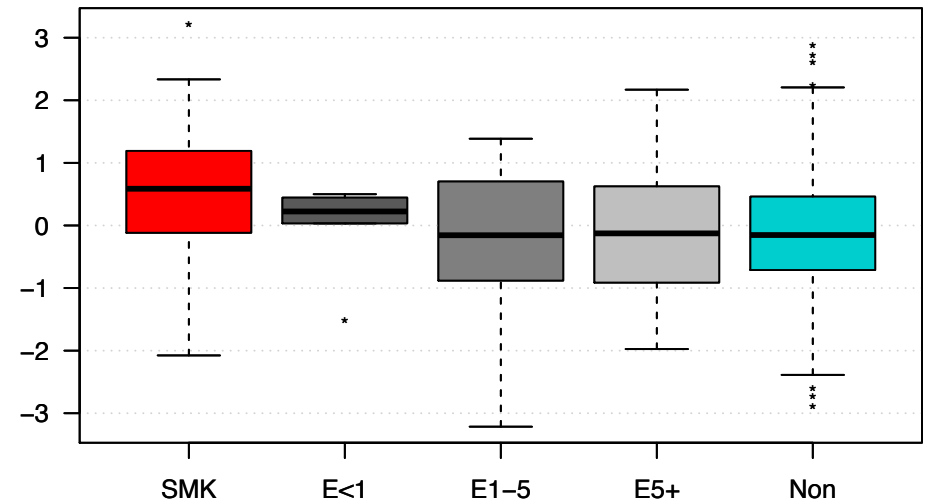

**ENSG00000161544.4\_CYGB**  
P-value = 3.42e-06

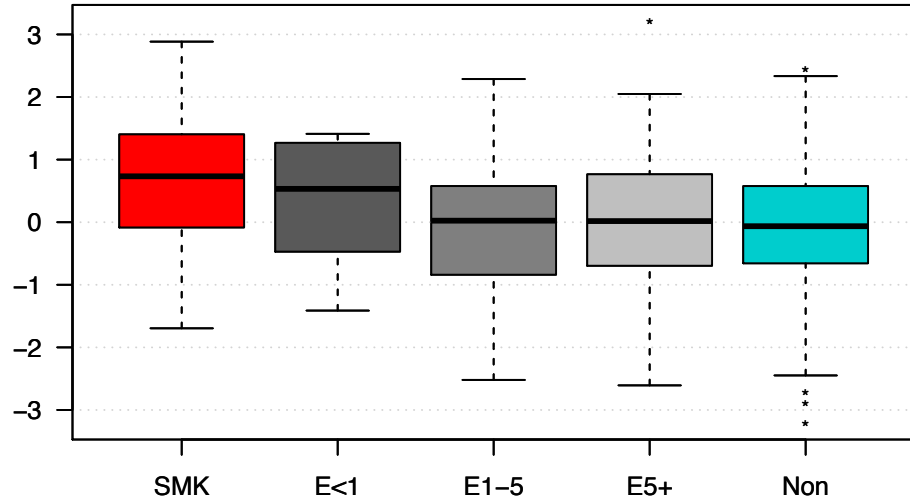

**ENSG00000154065.9\_ANKRD29**  
P-value = 3.49e-06

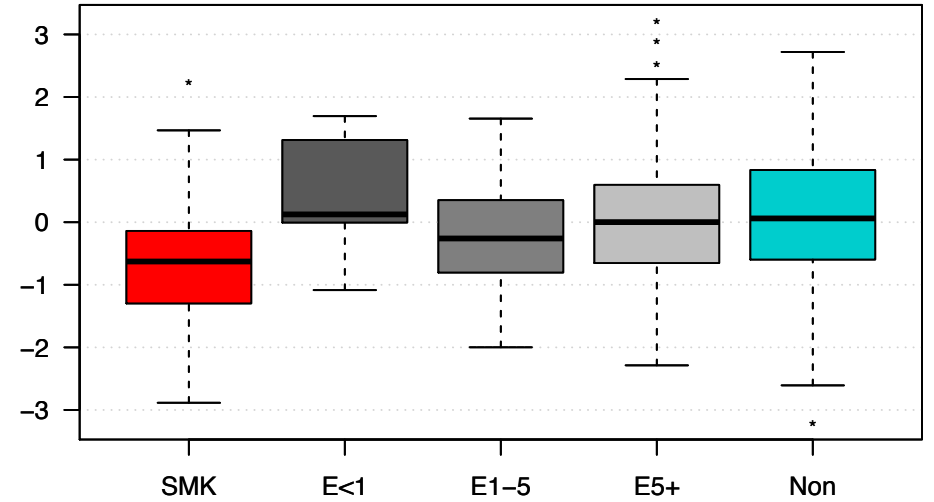

**ENSG00000176907.3\_C8orf4**  
P-value = 3.56e-06

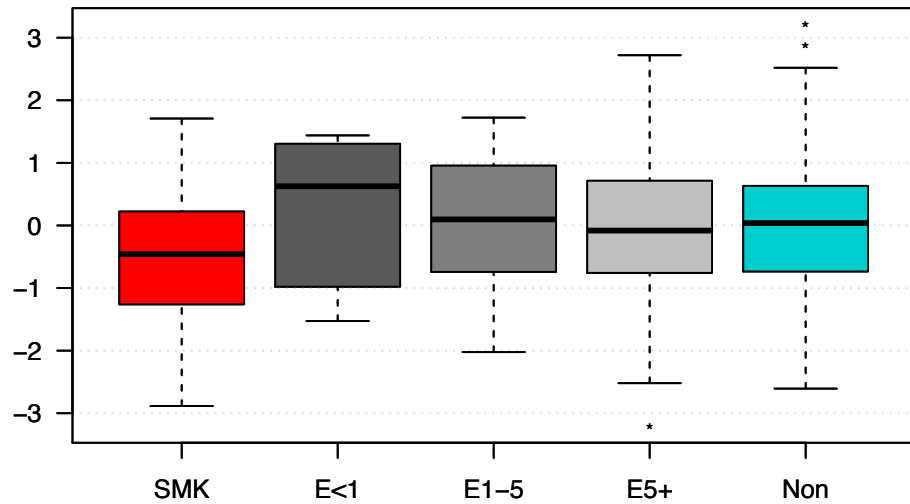

**ENSG00000168032.4\_ENTPD3**  
P-value = 3.86e-06

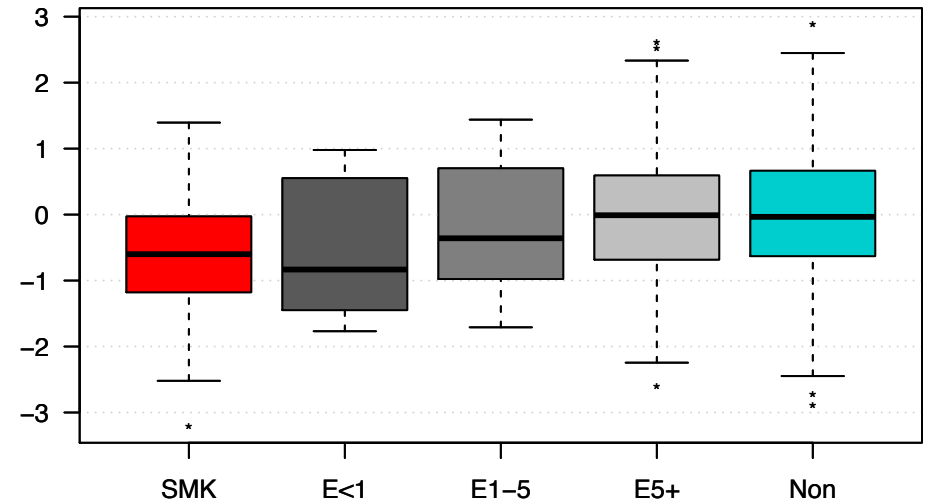

**ENSG00000162367.6\_TAL1**  
P-value = 4.17e-06

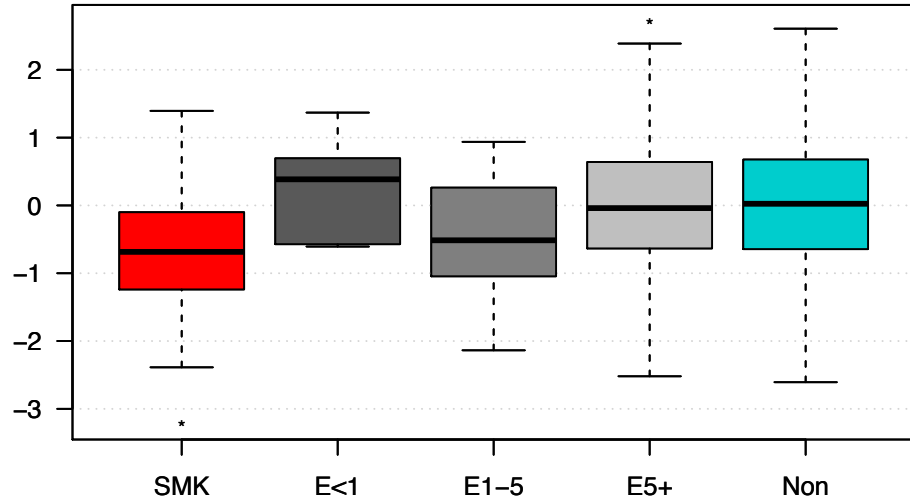

**ENSG00000180785.8\_OR51E1**  
P-value = 6.82e-06

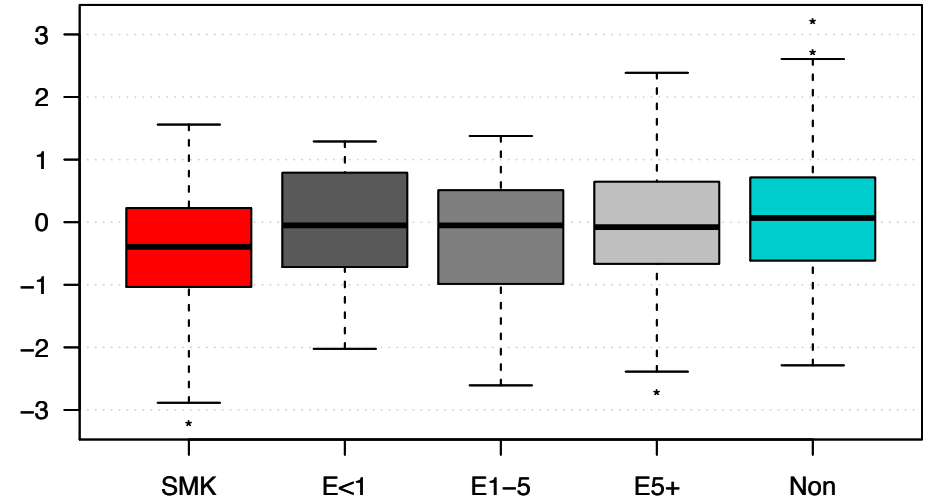

**ENSG00000164010.9\_ERMAP**  
P-value = 9.50e-06

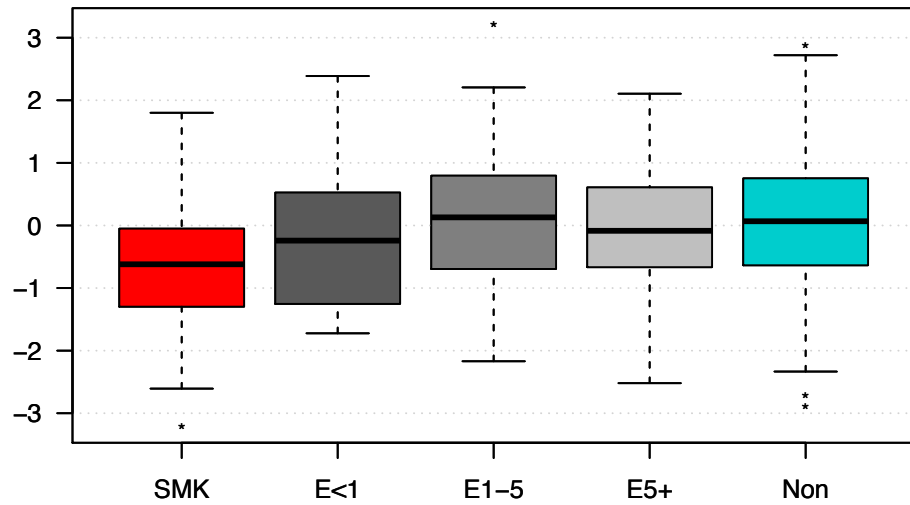

**ENSG00000068078.12\_FGFR3**  
P-value = 9.68e-06

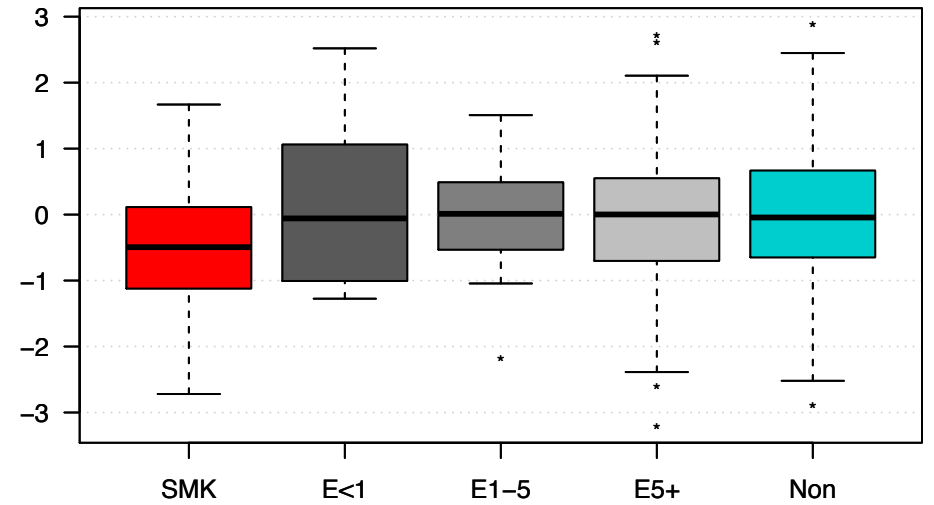

**ENSG00000246223.4\_C14orf64**  
P-value = 1.44e-05

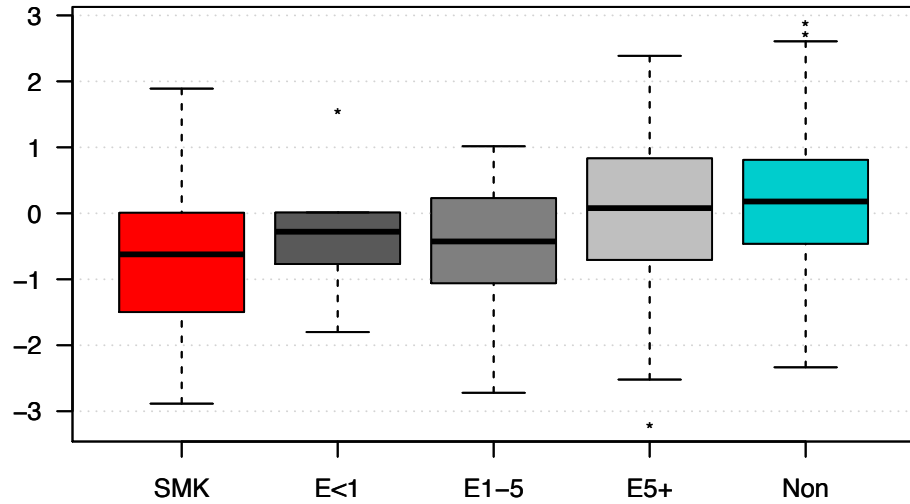

**ENSG00000145506.9\_NKD2**  
P-value = 1.46e-05

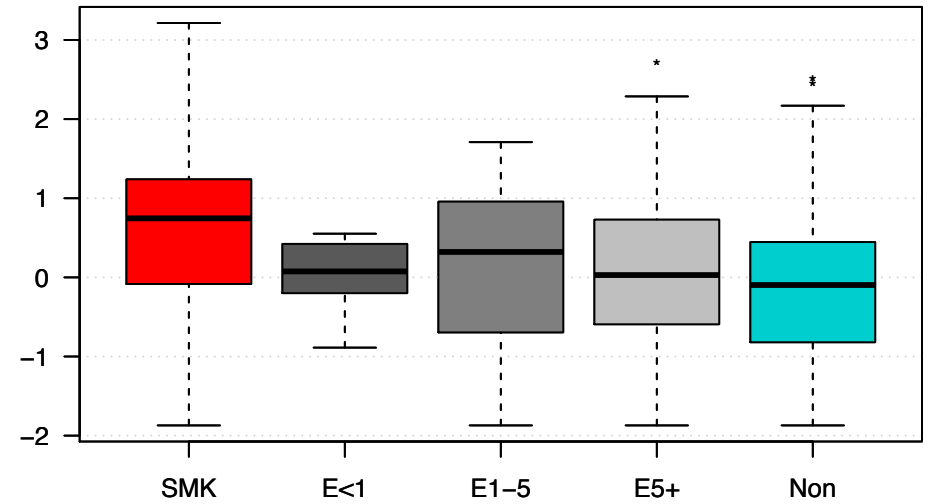

**ENSG00000161649.7\_CD300LG**  
P-value = 1.48e-05

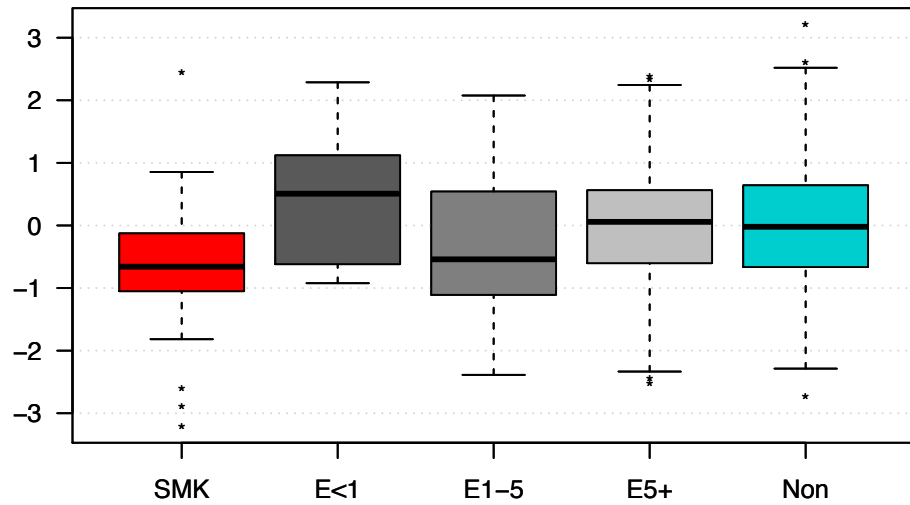

**ENSG00000163873.5\_GRIK3**  
P-value = 1.50e-05

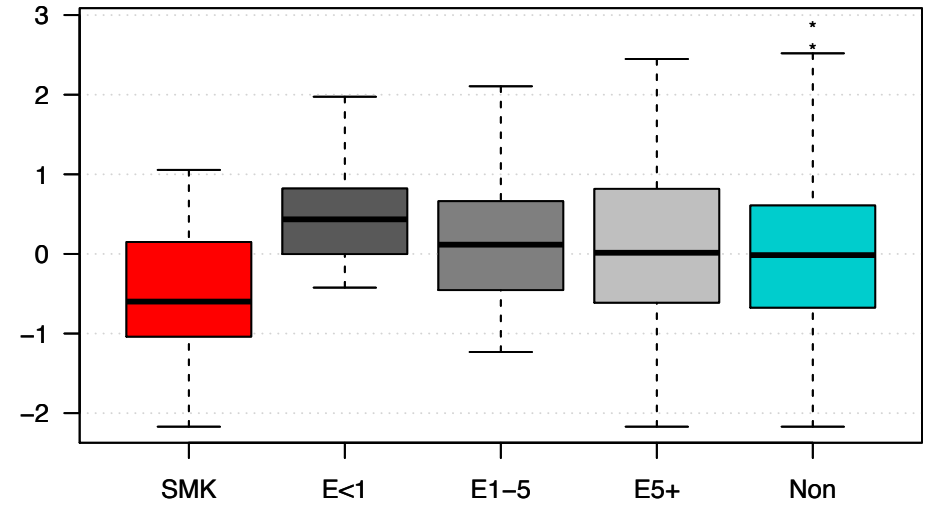

**ENSG0000053747.9\_LAMA3**  
P-value = 1.57e-05

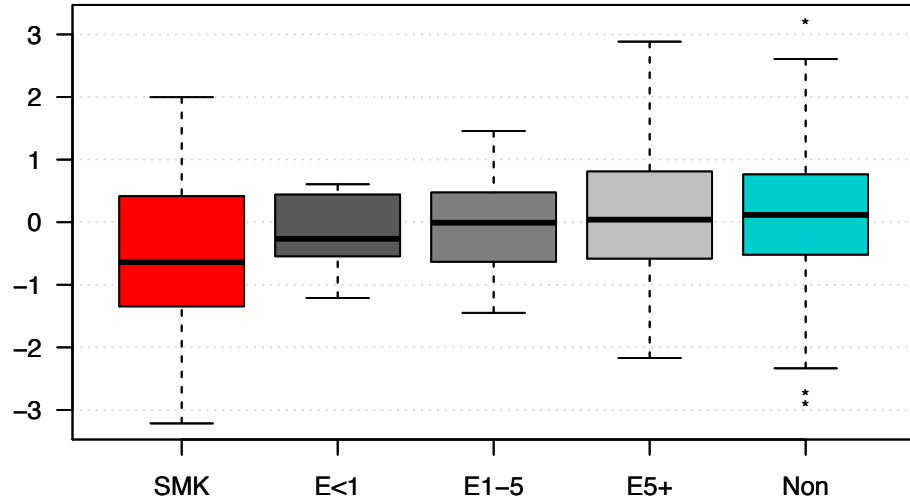

**ENSG00000183733.6\_FIGLA**  
P-value = 1.57e-05

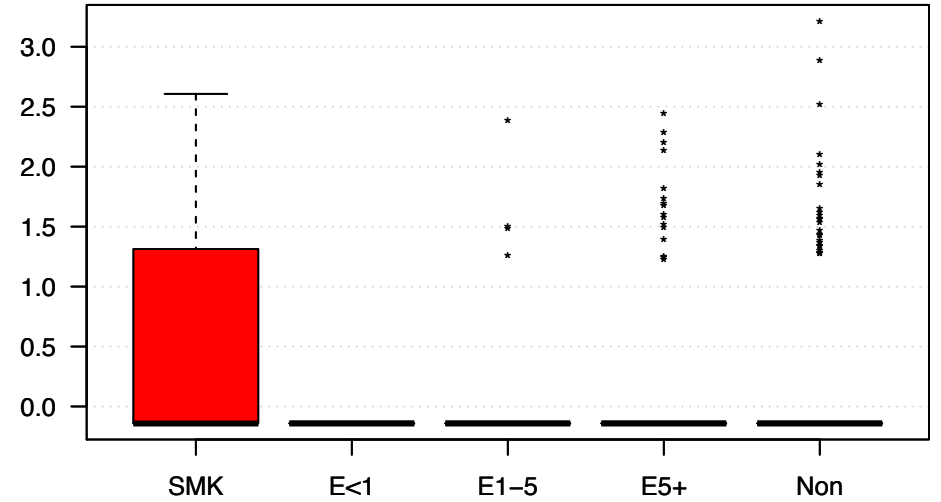

**ENSG00000164736.5\_SOX17**  
P-value = 1.64e-05

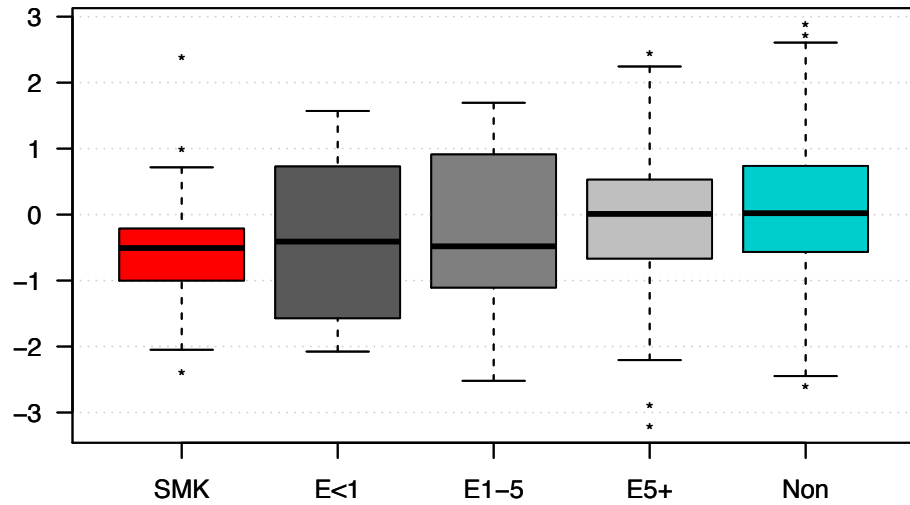

**ENSG00000106078.12\_COBL**  
P-value = 1.65e-05

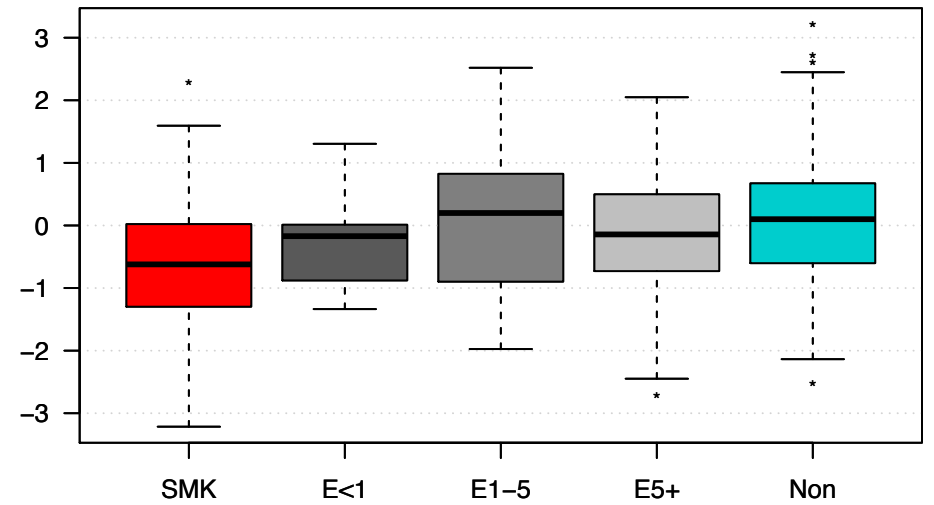

**ENSG00000120156.14\_TEK**  
P-value = 1.67e-05

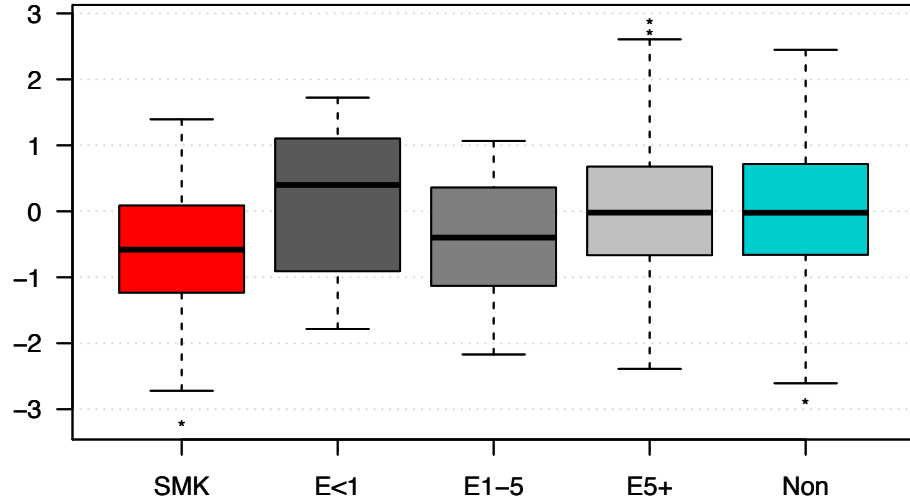

**ENSG00000178726.5\_THBD**  
P-value = 2.00e-05

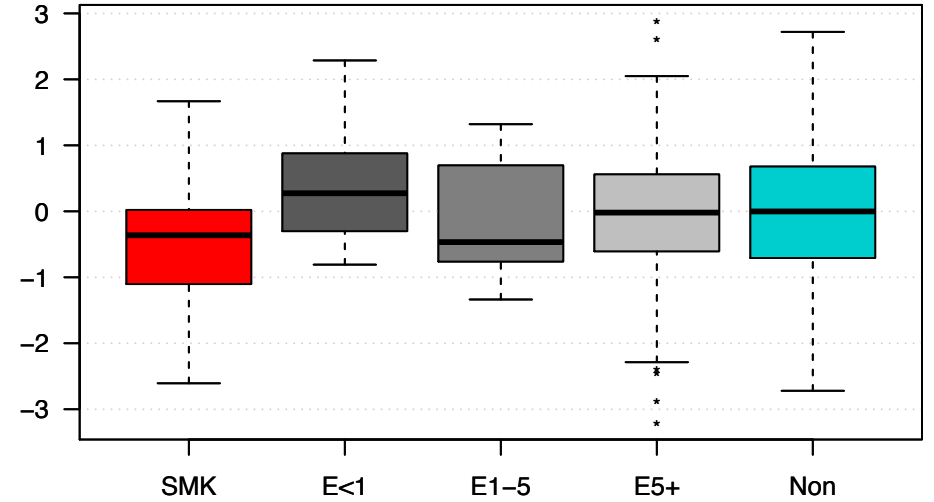

**ENSG00000177675.4\_CD163L1**  
P-value = 2.40e-05

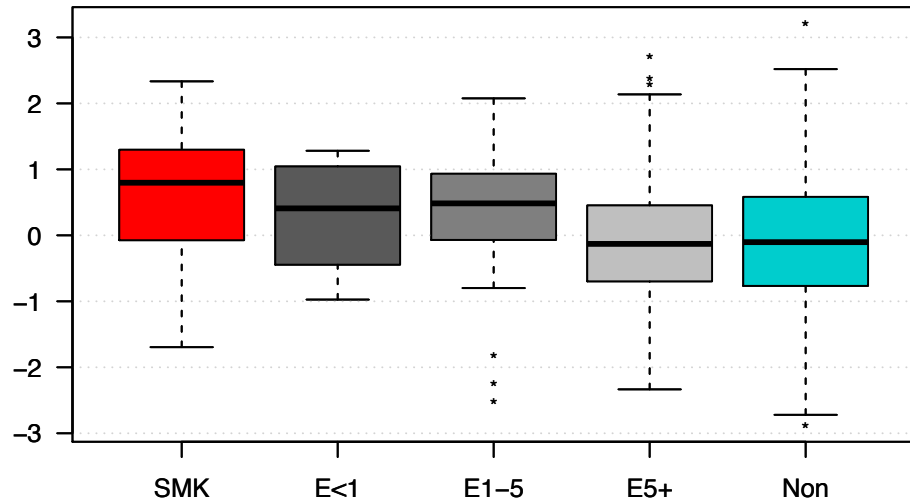

**ENSG00000136828.13\_RALGPS1**  
P-value = 2.60e-05

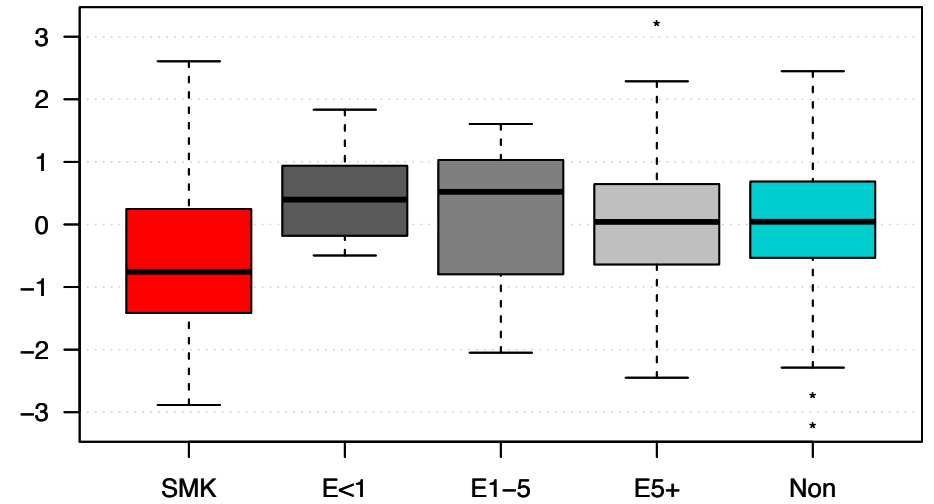

**ENSG00000135914.4\_HTR2B**  
**P-value = 2.82e-05**

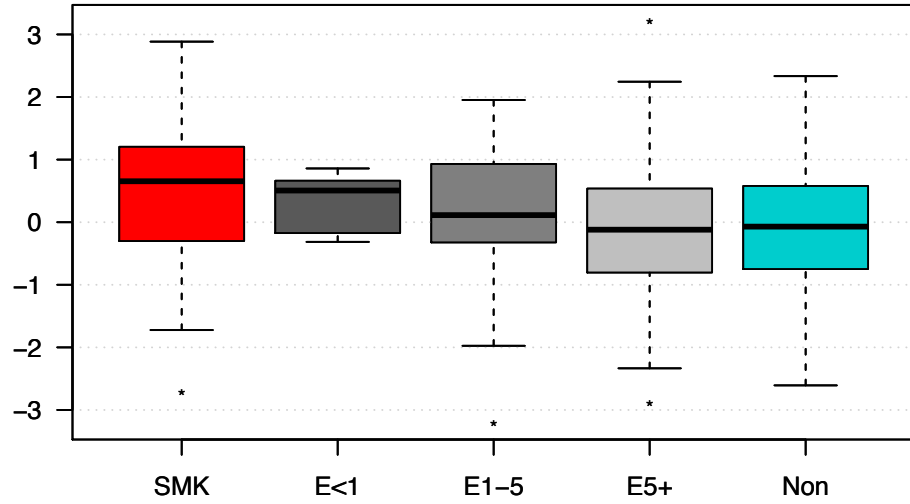

**ENSG00000090530.5\_LEPREL1**  
**P-value = 2.86e-05**

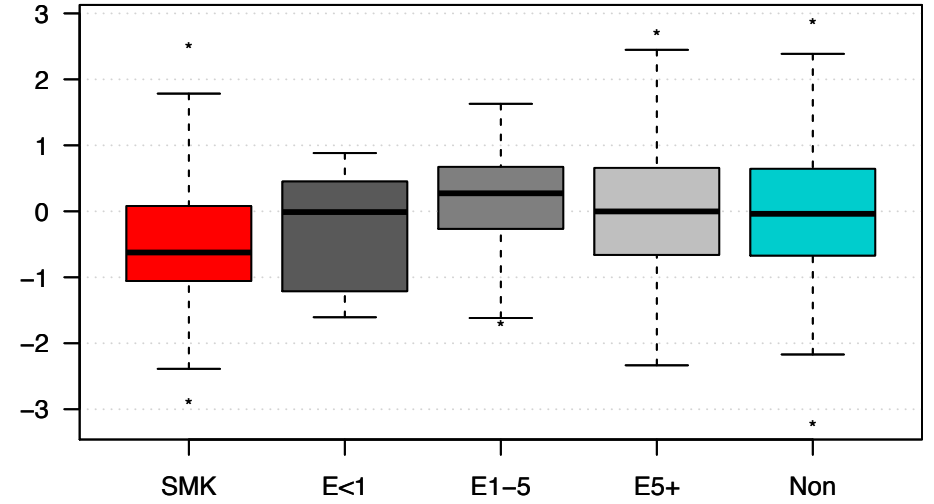

Figure S4

$p=0.370513545247293$

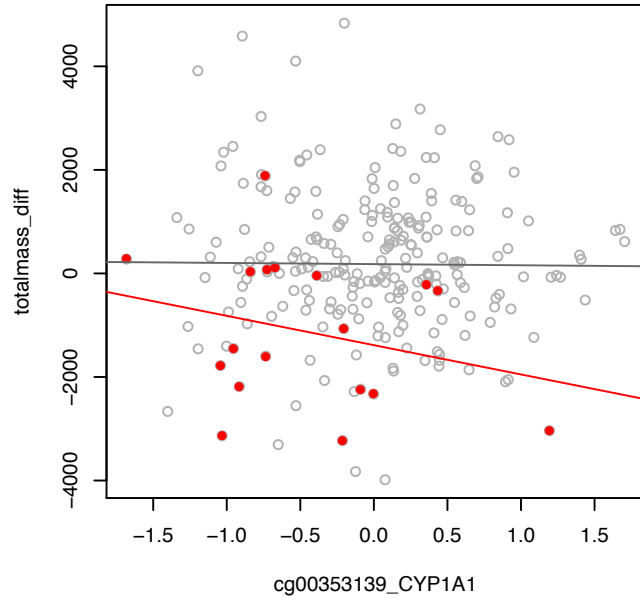

$p=0.992163102807739$

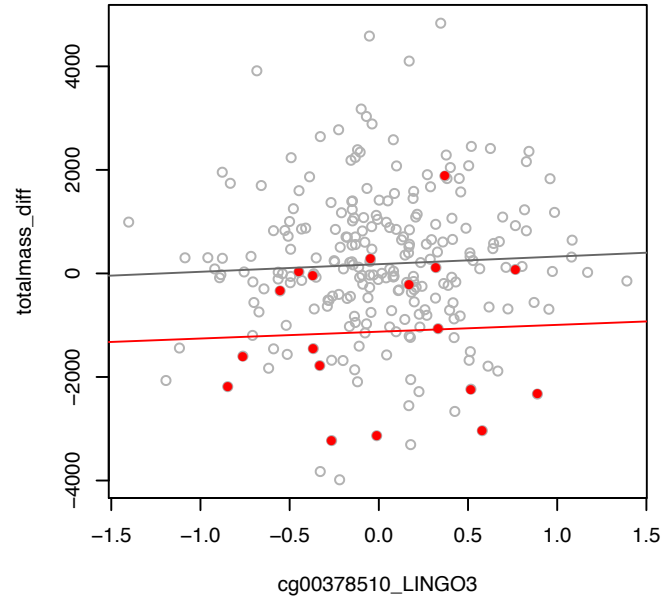

$p=0.947850937328017$

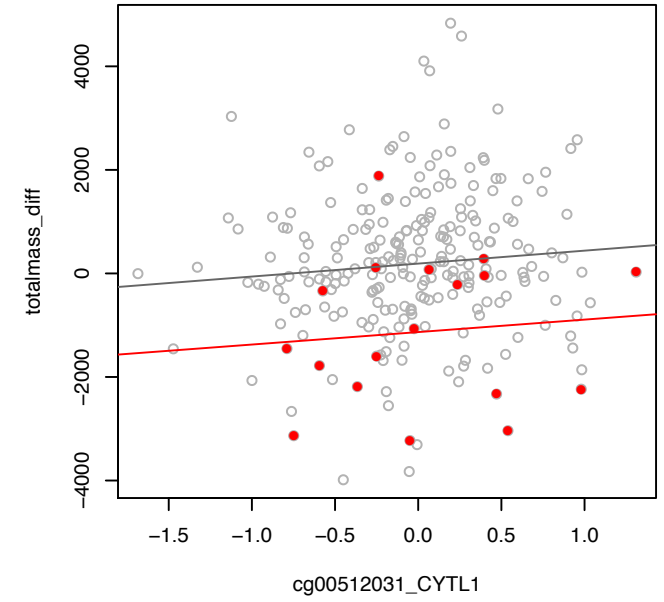

$p=0.0695526259638902$

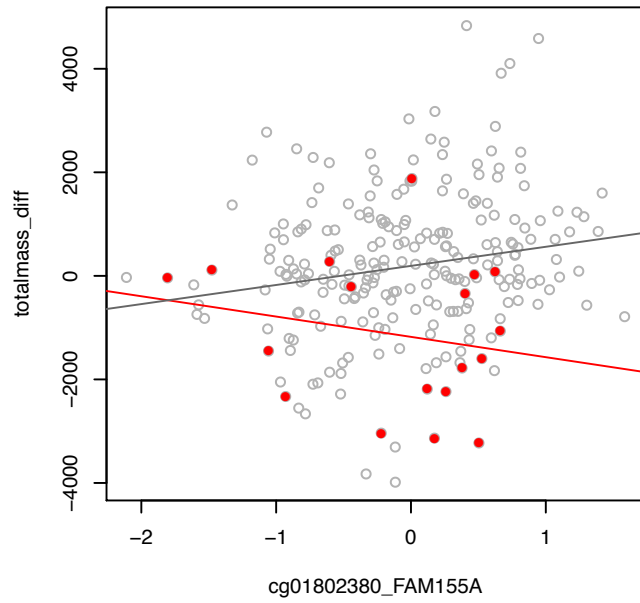

$p=0.224138989978709$

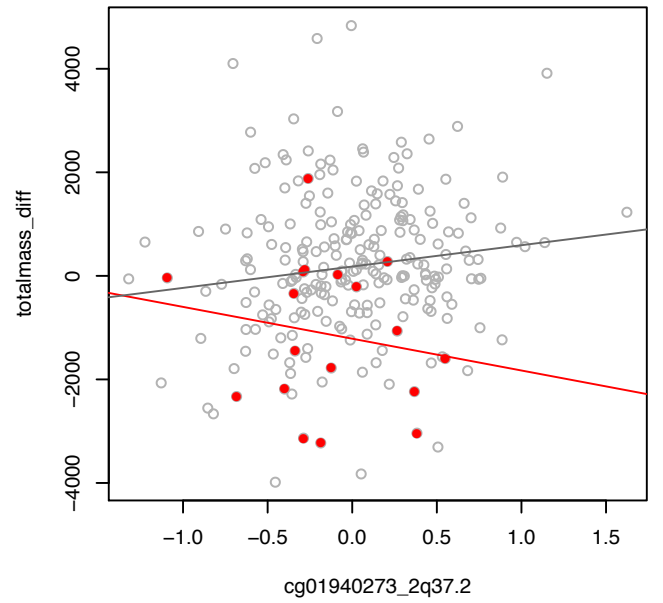

$p=0.202326890447426$

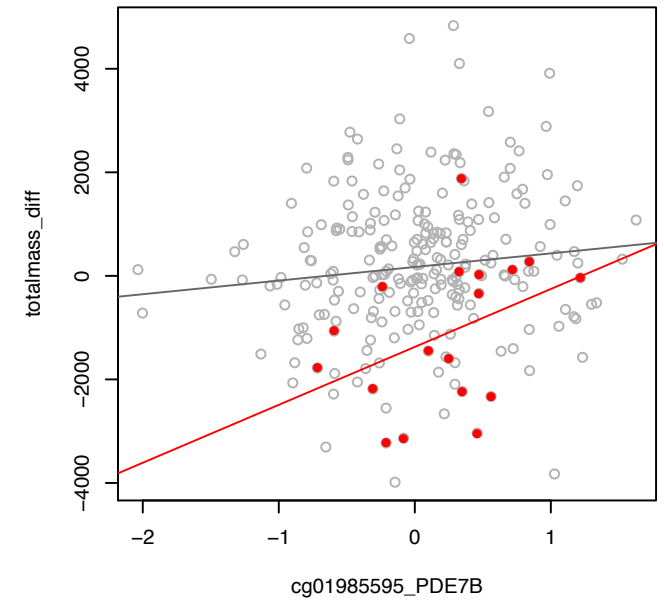



**p=0.0078494356340268**

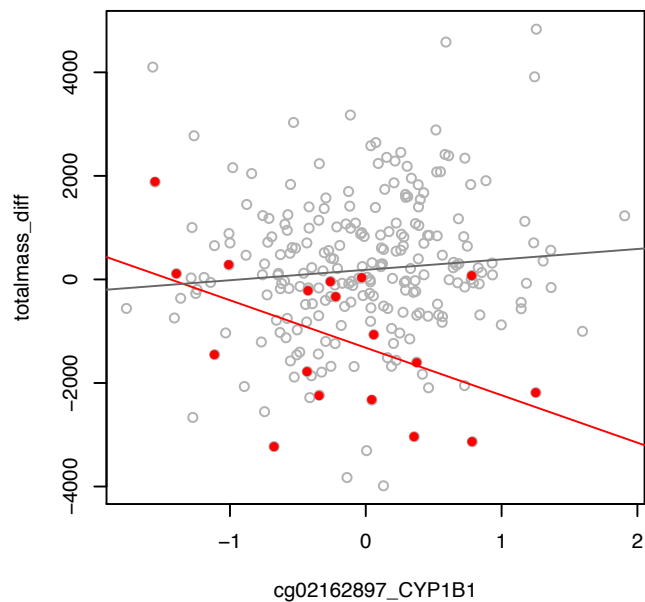

**p=0.32335078545329**

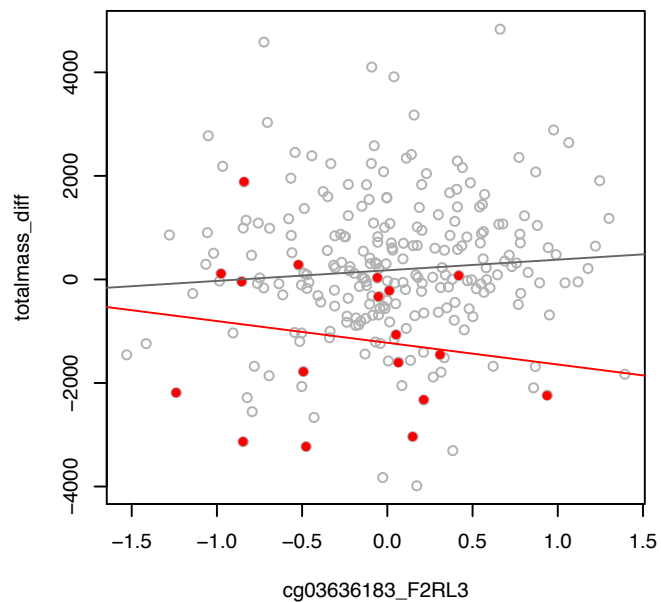

**p=0.0525974476712135**

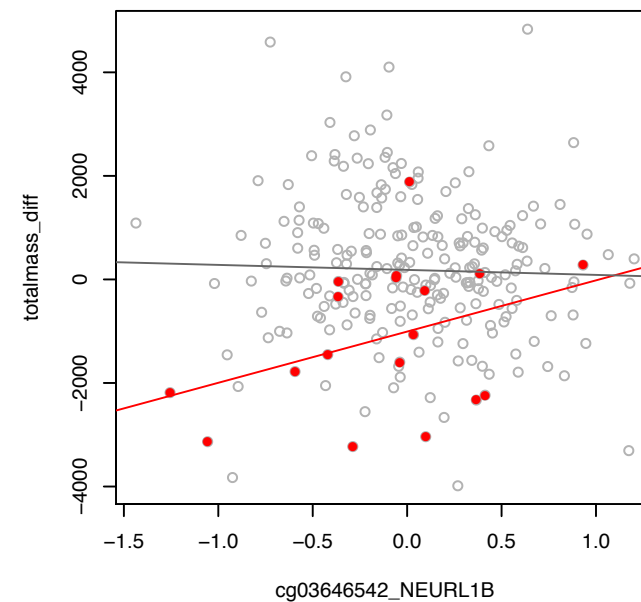

**p=0.0626720702560141**

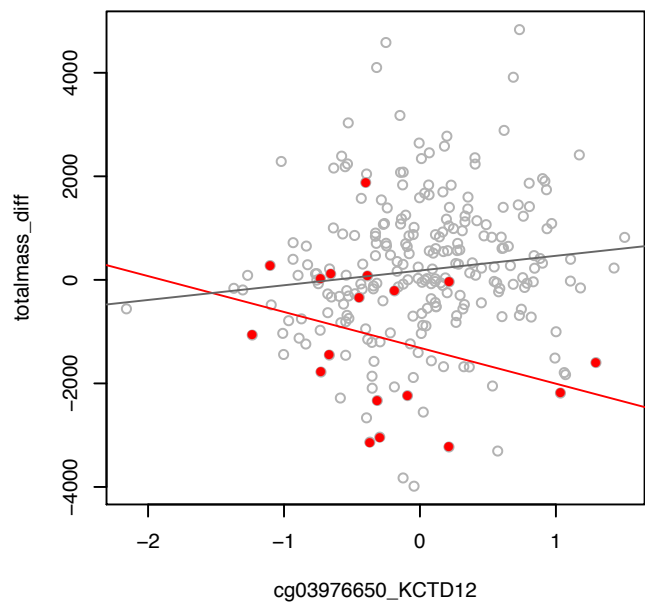

**p=0.0193542809480328**

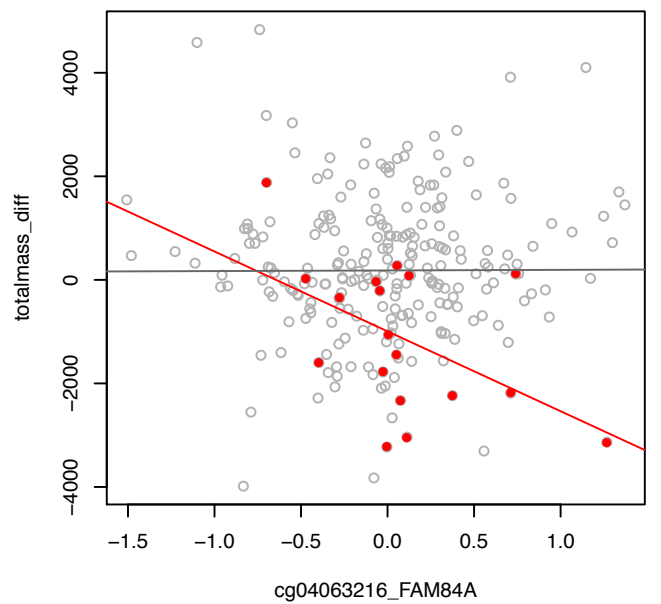

**p=0.608955293062918**

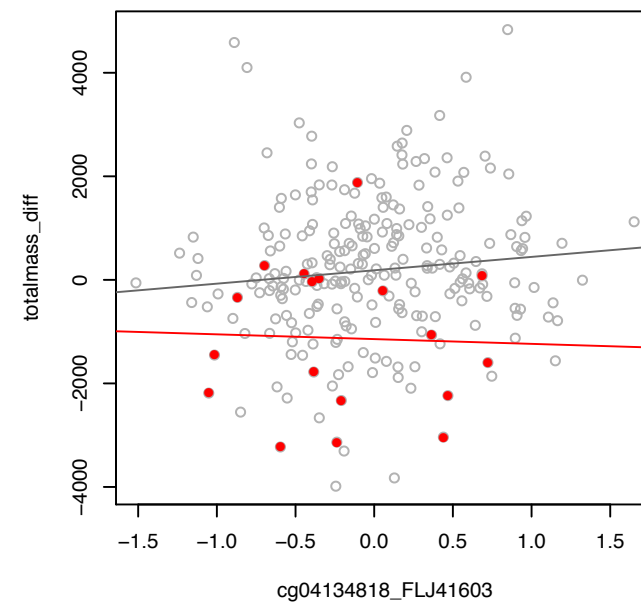

**p=0.217025753275619**

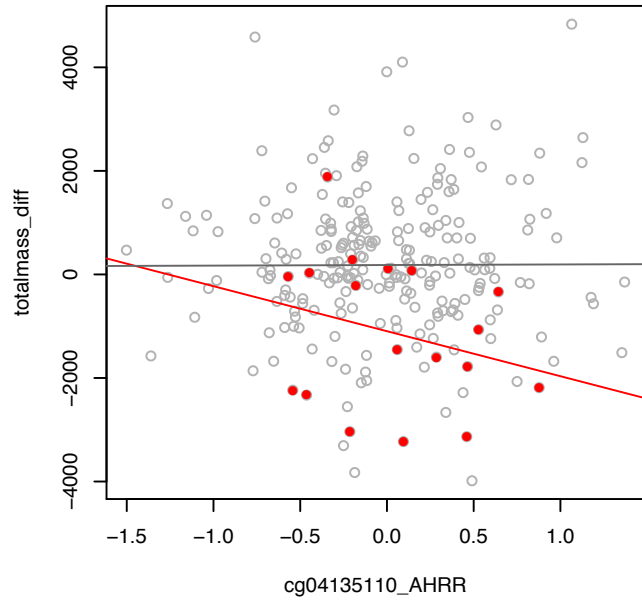

**p=0.0115486652427332**

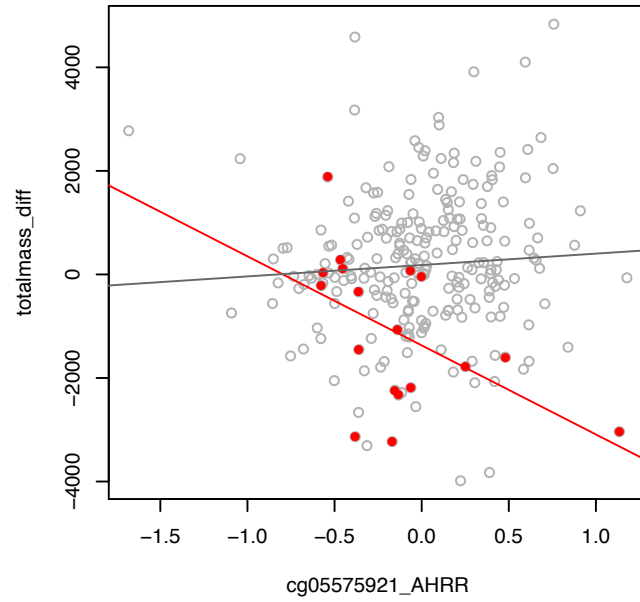

**p=0.537355235810121**

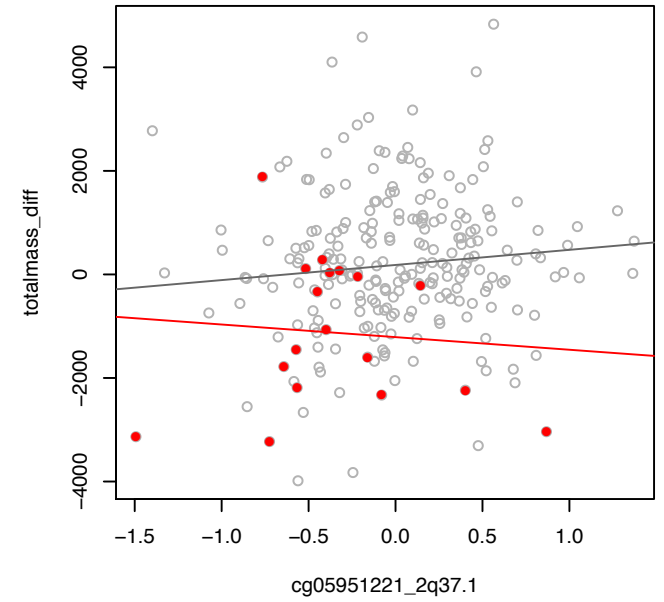

**p=0.988229151734416**

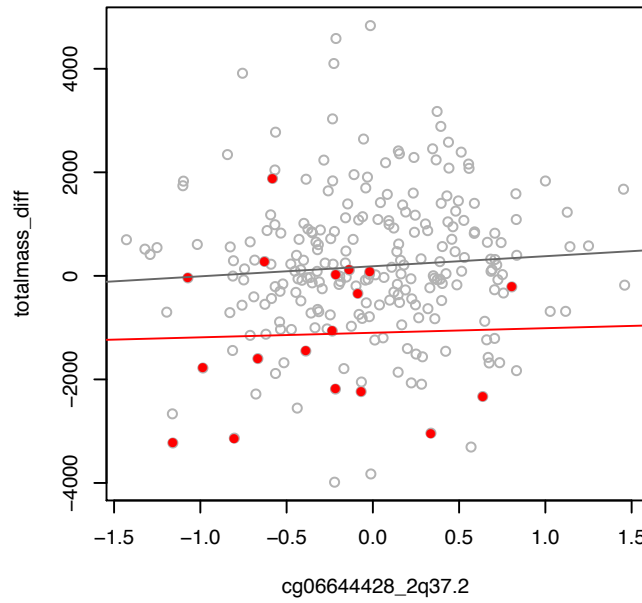

**p=0.108463423111928**

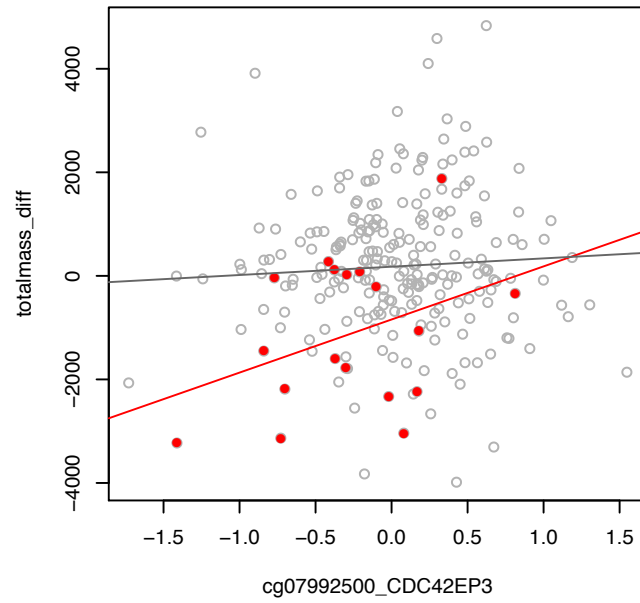

**p=0.69837094307498**

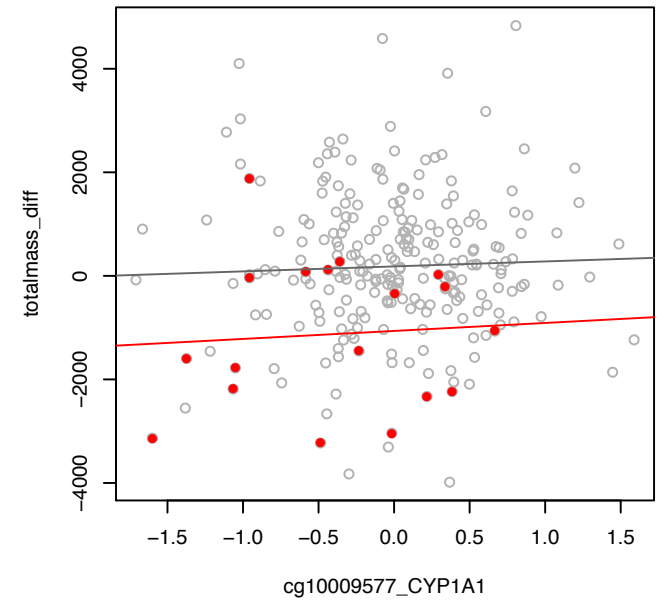

**p=0.985721801000675**

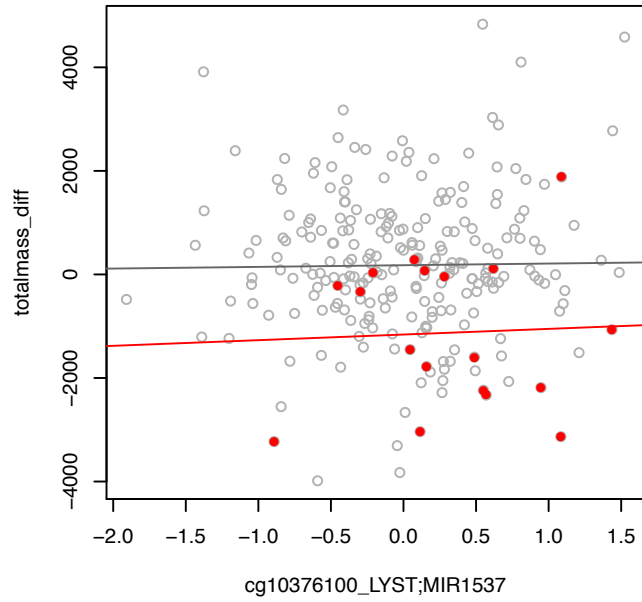

**p=0.302587575560751**

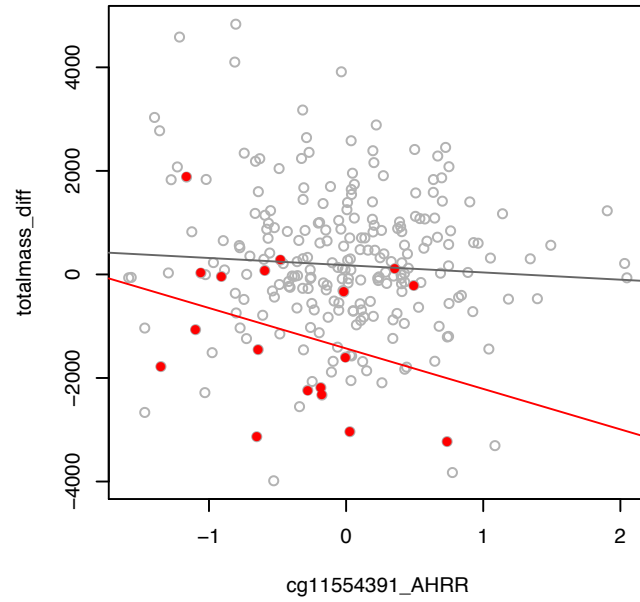

**p=0.493740975201742**

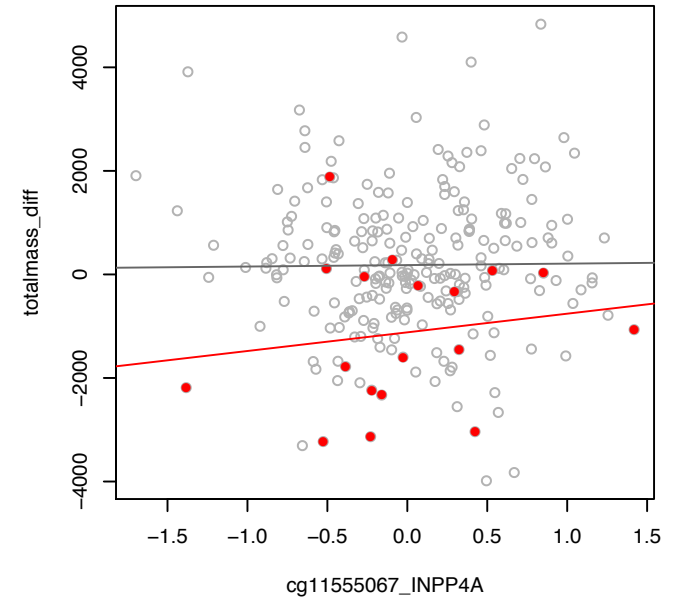

**p=0.280309571900903**

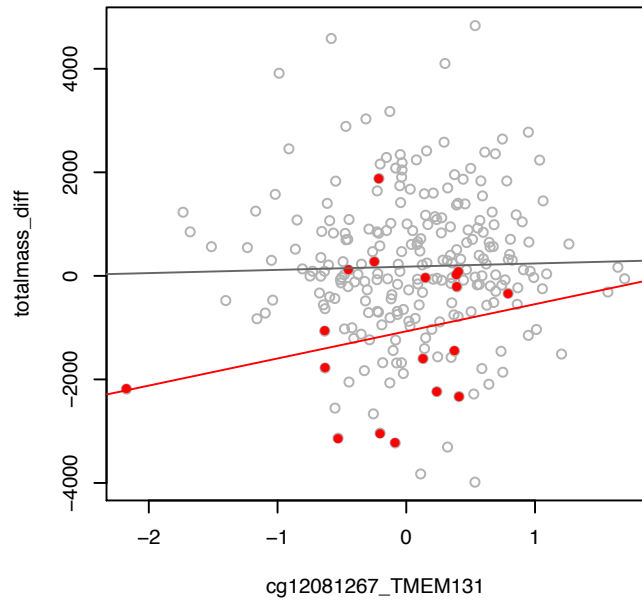

**p=0.418060930147289**

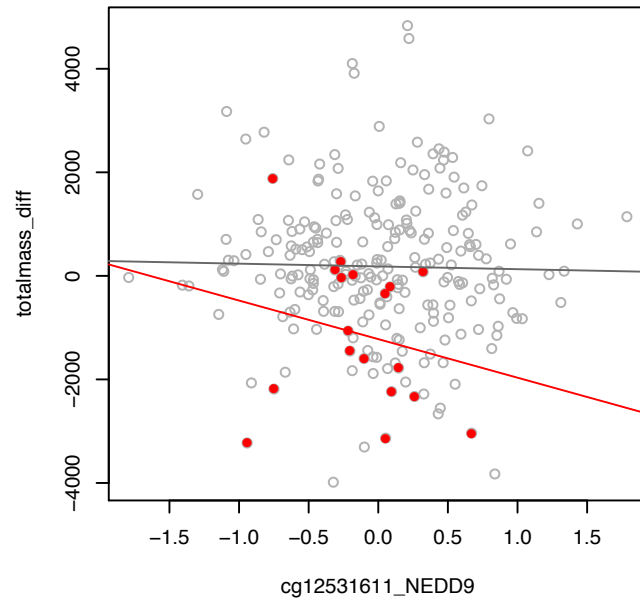

**p=0.980754391540722**

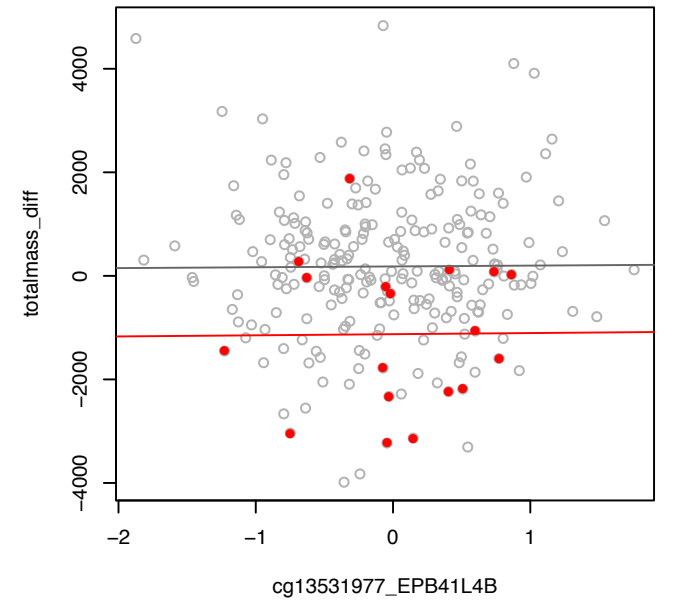

**p=0.144168235297602**

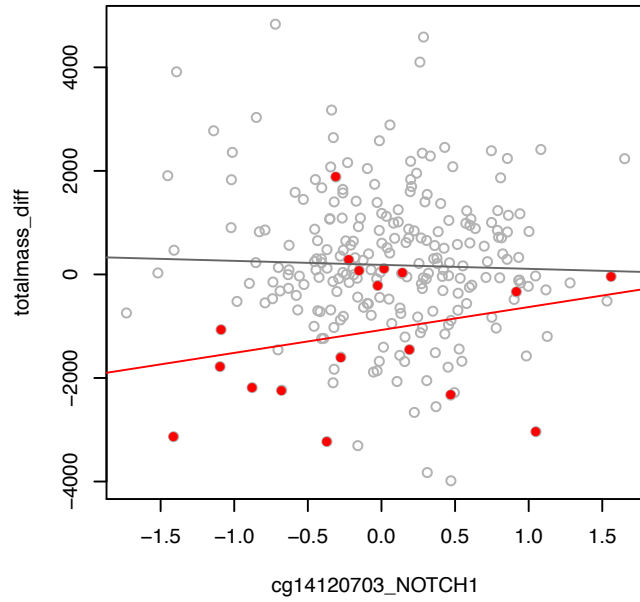

**p=0.262467328382701**

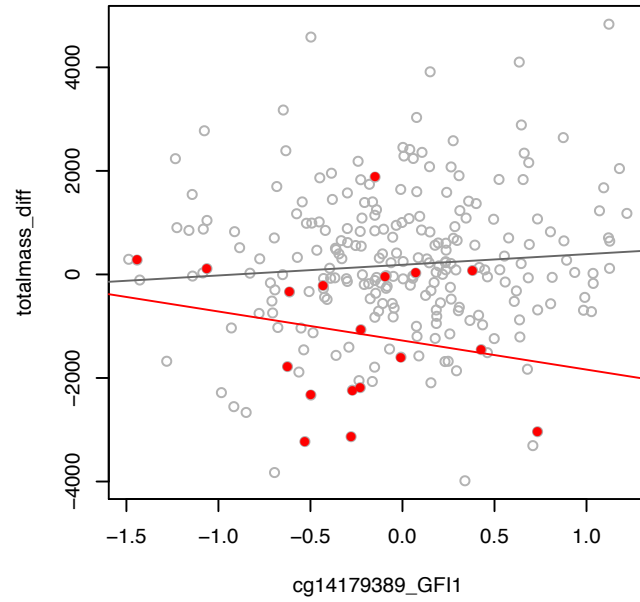

**p=0.000930144342571072**

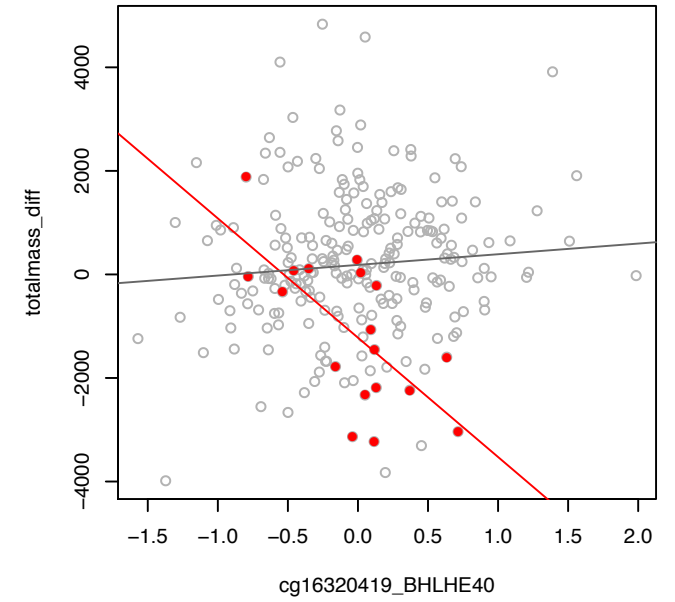

**p=0.625403023019055**

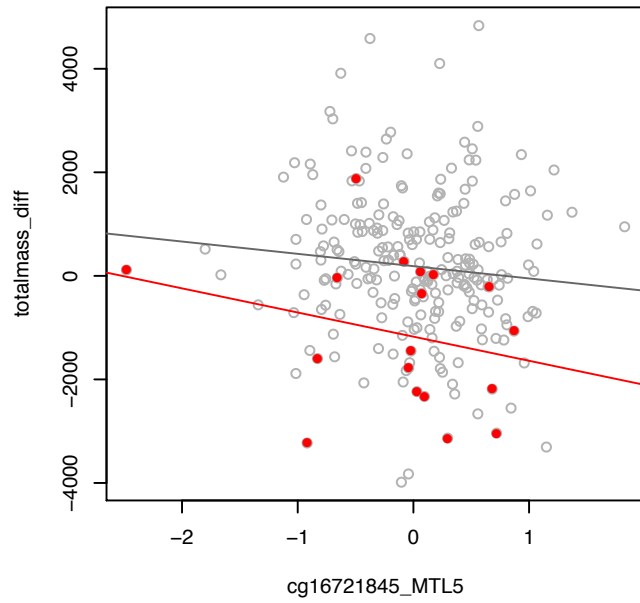

**p=0.916037352352567**

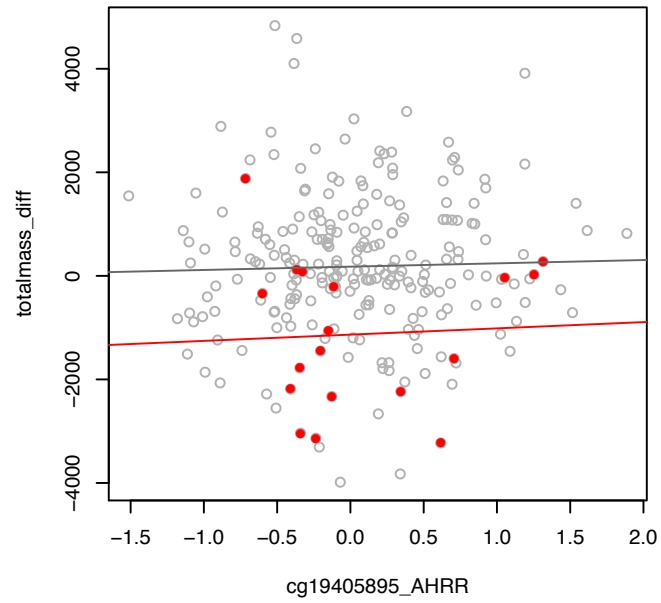

**p=0.371078035949396**

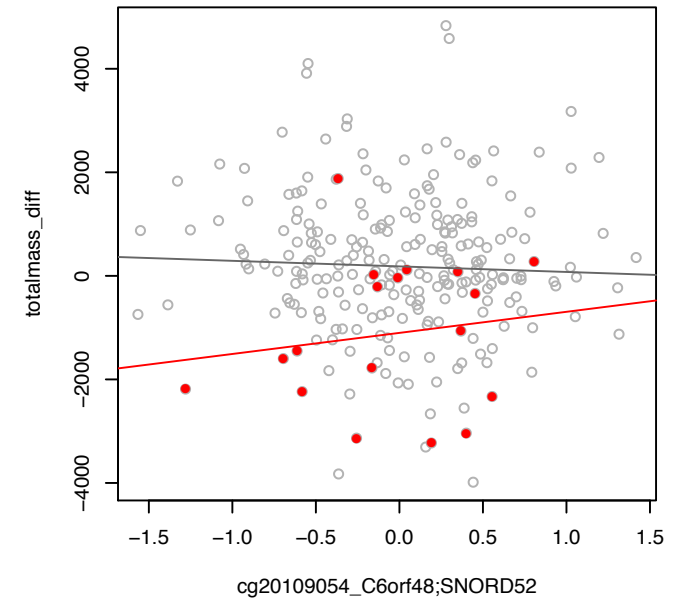

**p=0.195423177721804**

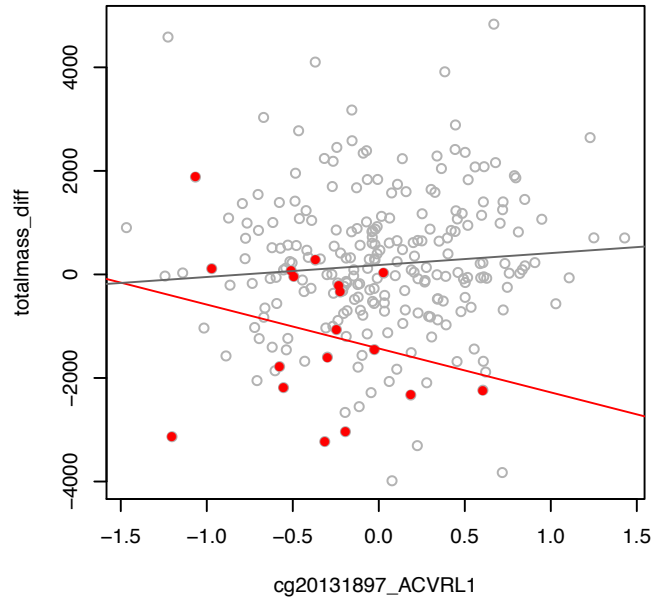

**p=0.0389708476212209**

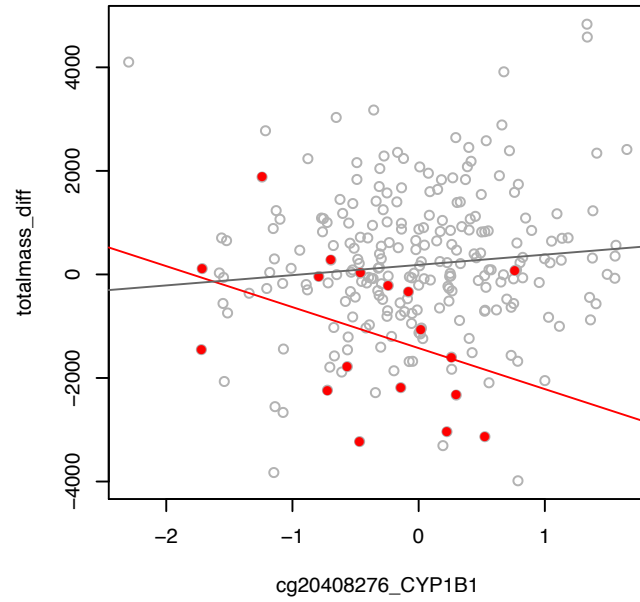

**p=0.698600332161898**

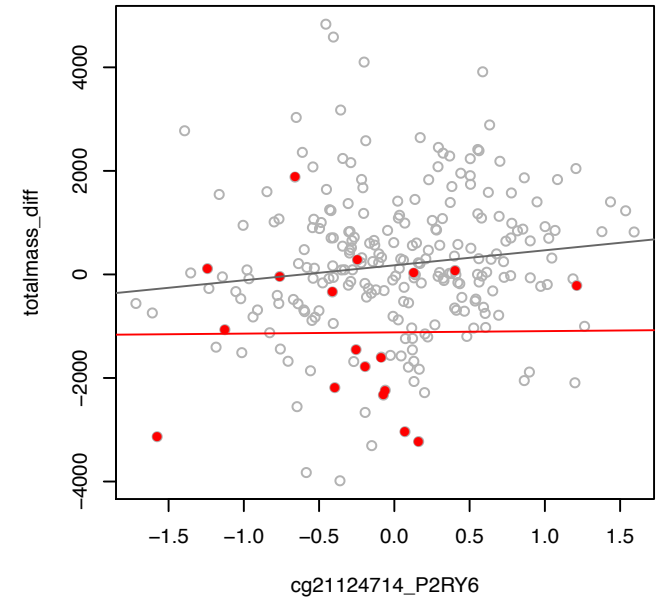

**p=0.701029169997198**

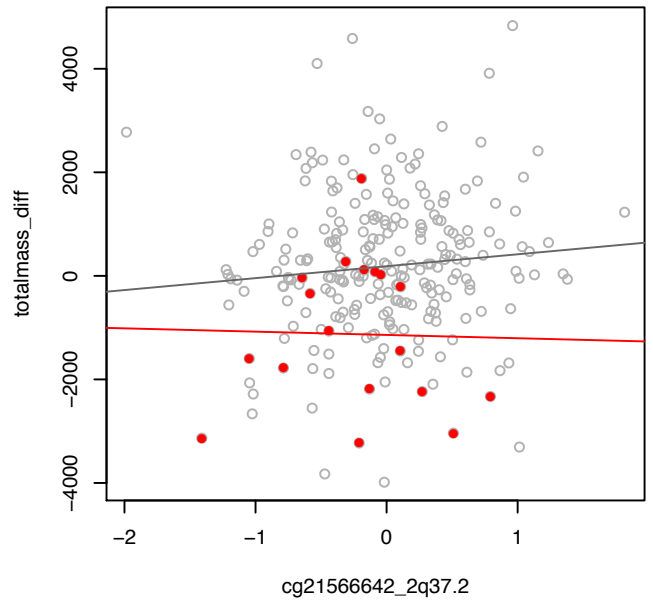

**p=0.435294895420545**

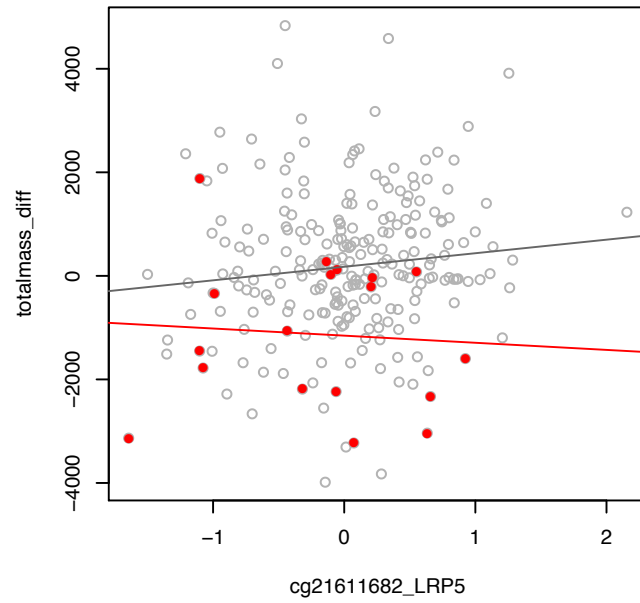

**p=0.218853838693733**

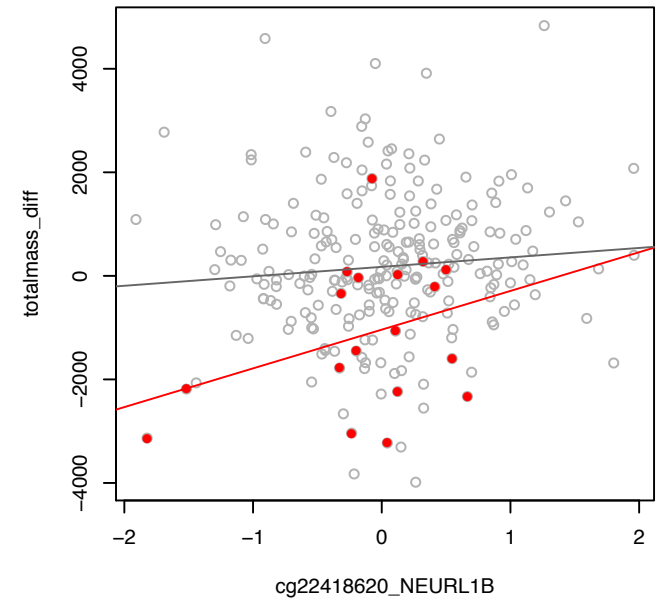

**p=0.162828528404653**

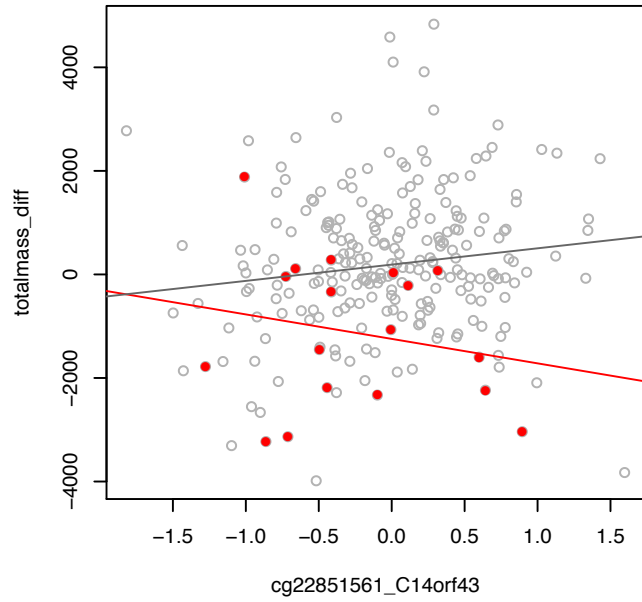

**p=0.358535188290663**

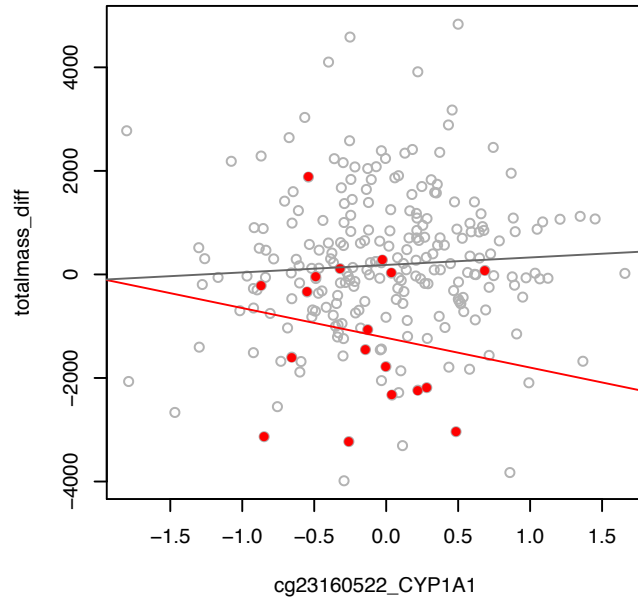

**p=0.439217159457982**

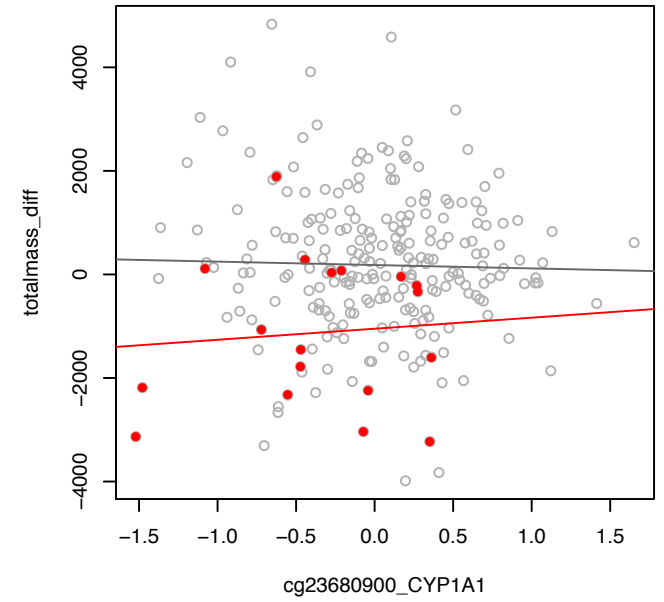

**p=0.447258312620653**

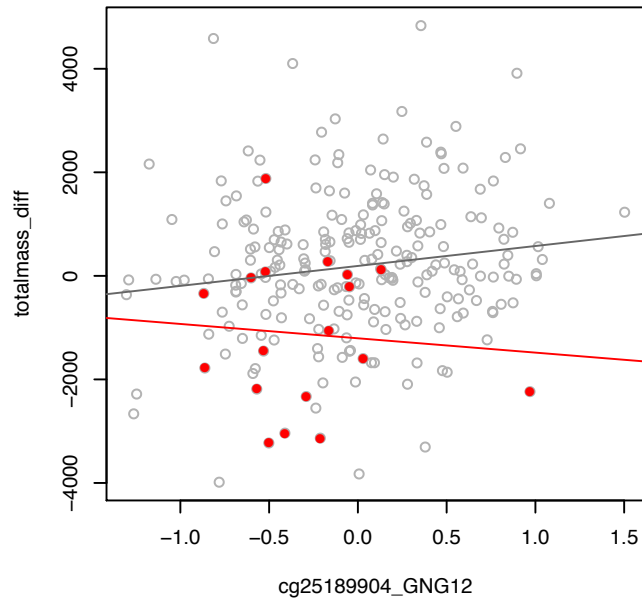

**p=0.181915475226653**

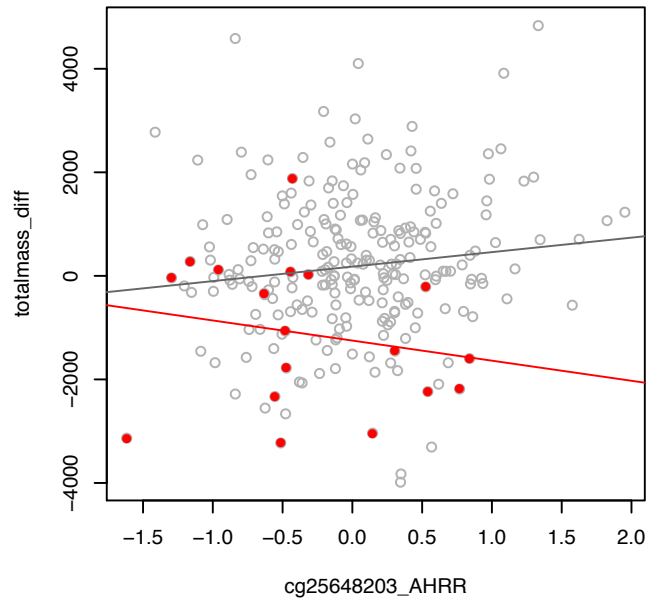

**p=0.0679386743532325**

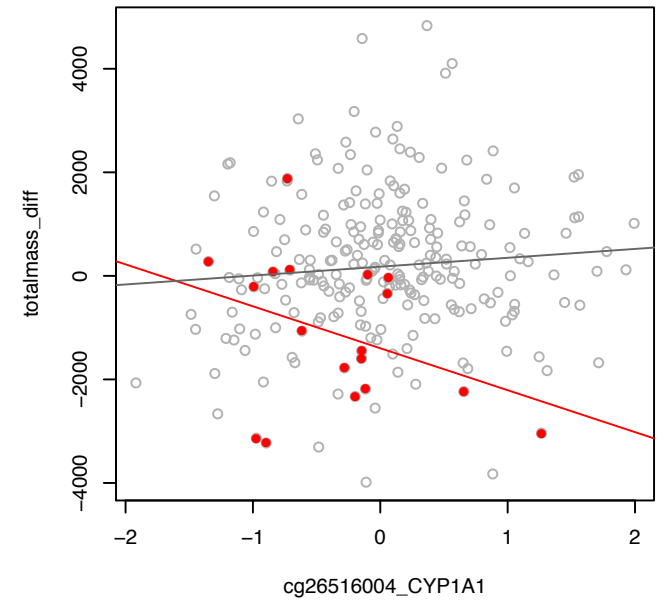

Figure S5

**p=0.453457892334907**

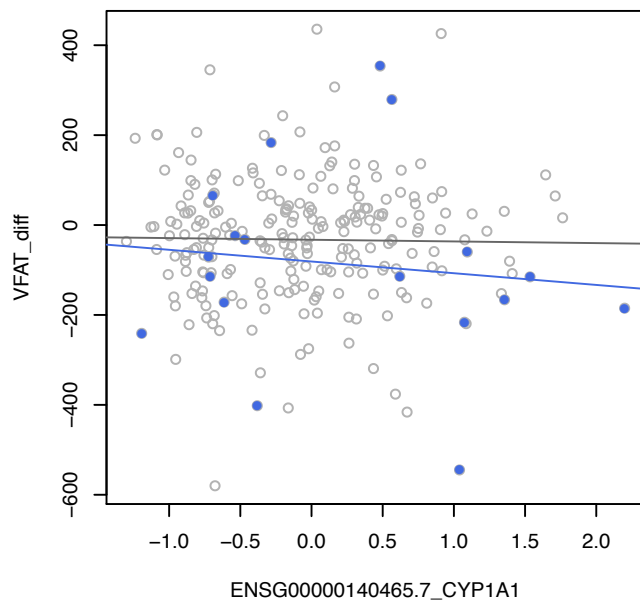

**p=0.432673540351699**

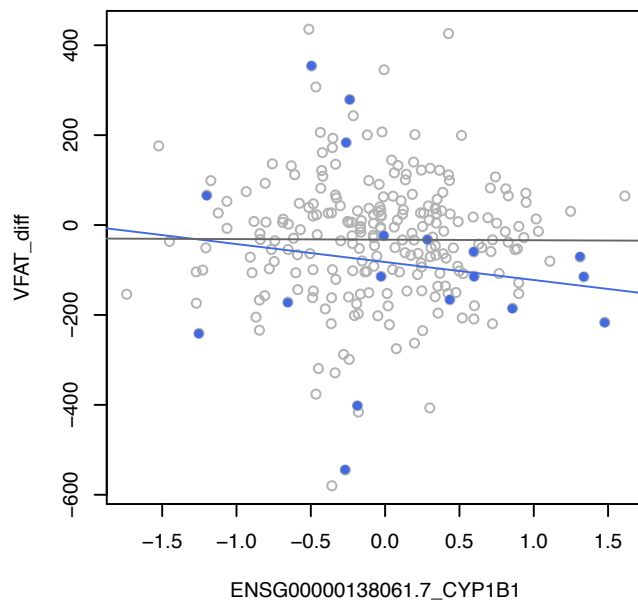

**p=0.306505761737575**

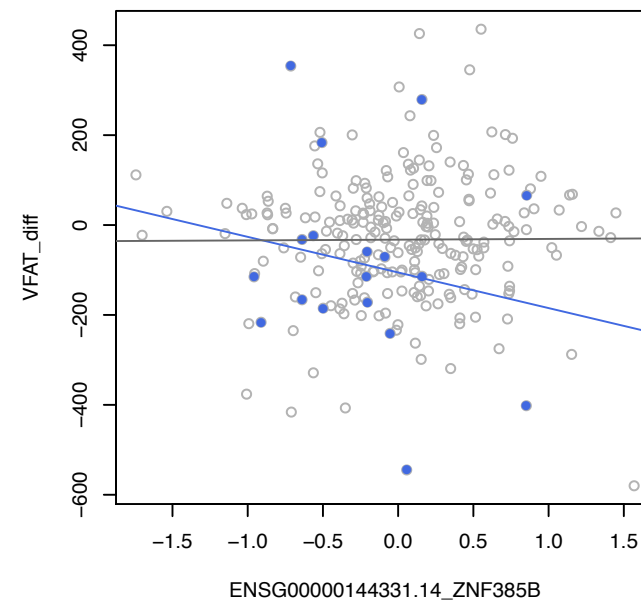

**p=0.0422318516292107**

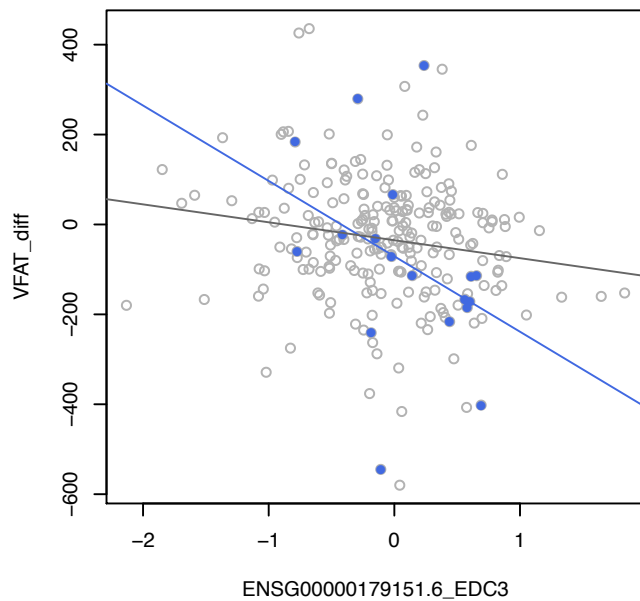

**p=4.70987432910354e-05**

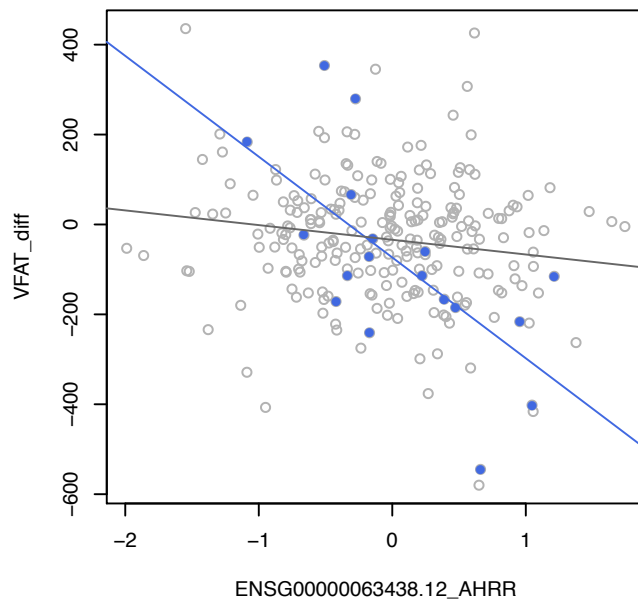

**p=0.0163192818112769**

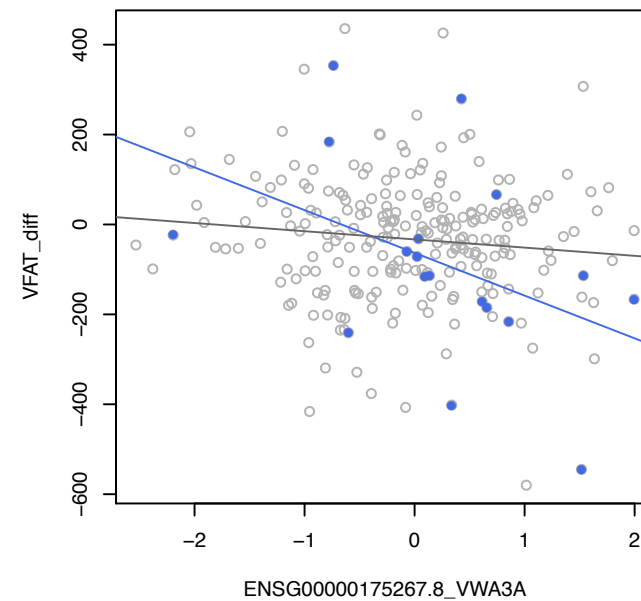

**p=0.44955521475572**

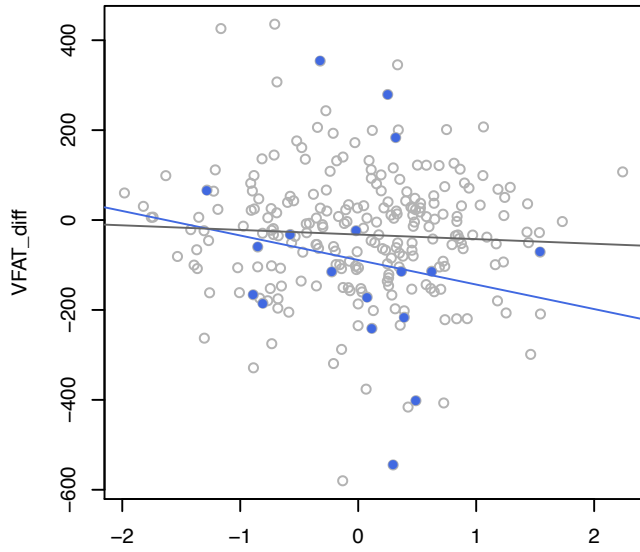

ENSG00000170381.7\_SEMA3E

**p=0.676434415103126**

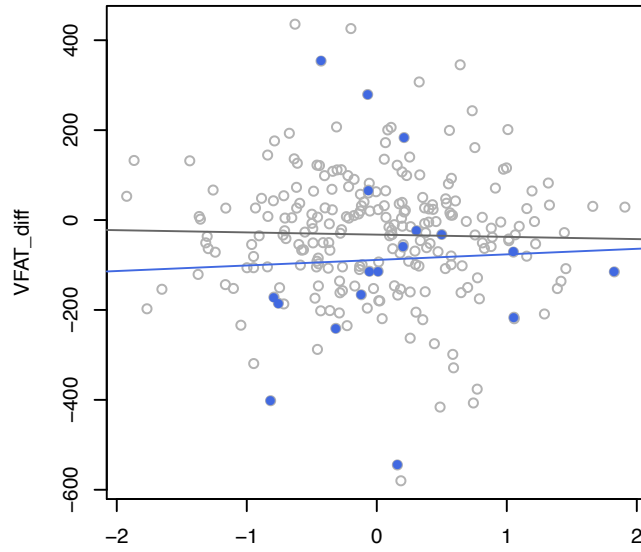

ENSG00000232973.3\_CYP1B1-AS1

**p=0.87557448992305**

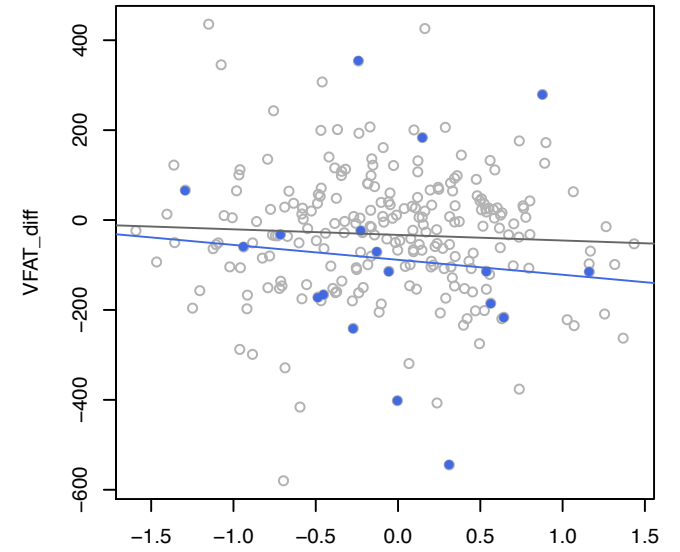

ENSG00000170891.6\_CYTL1

**p=0.0433398688816567**

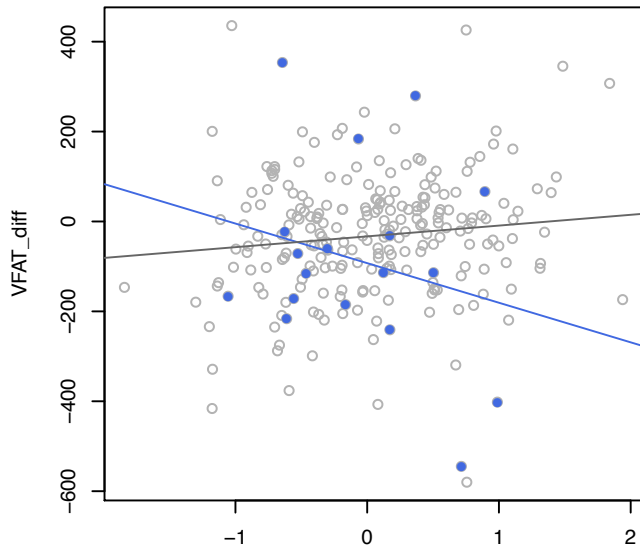

ENSG00000187486.5\_KCNJ11

**p=0.304516567598398**

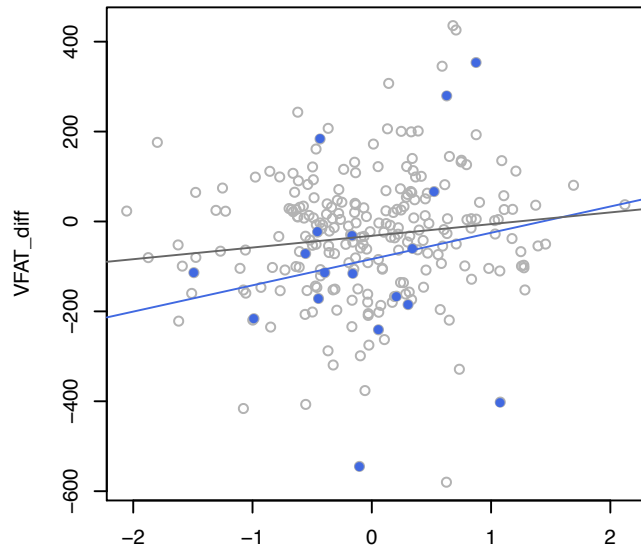

ENSG00000168280.11\_KIF5C

**p=0.466169281125415**

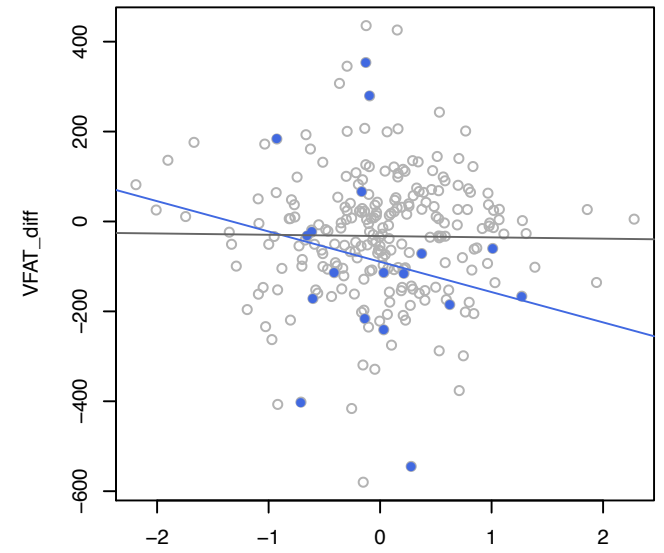

ENSG00000248433.2\_AL583842.7



**p=0.931369807284189**

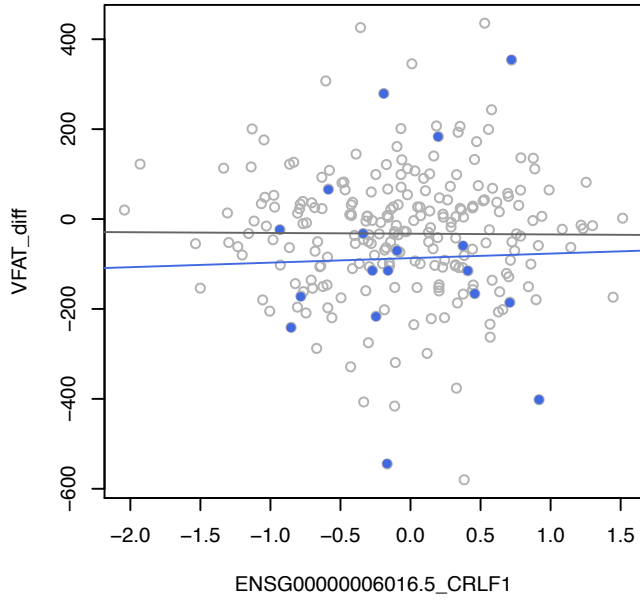

**p=0.00839518414516247**

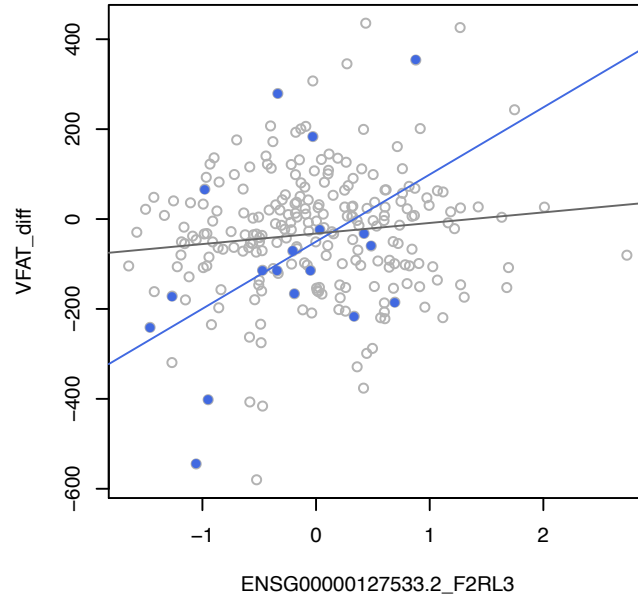

**p=0.829402833332273**

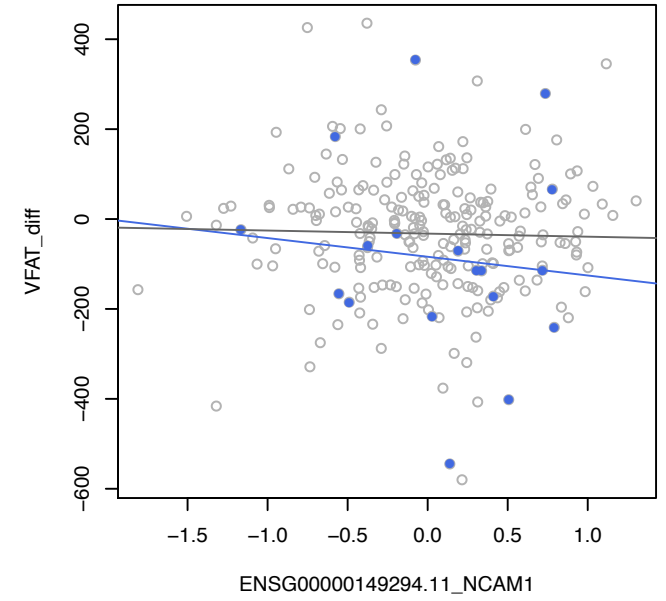

**p=0.429032479198726**

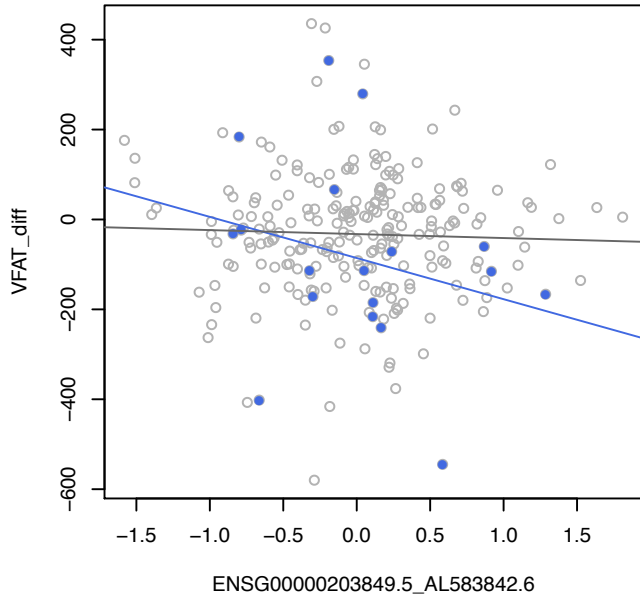

**p=0.687590447391227**

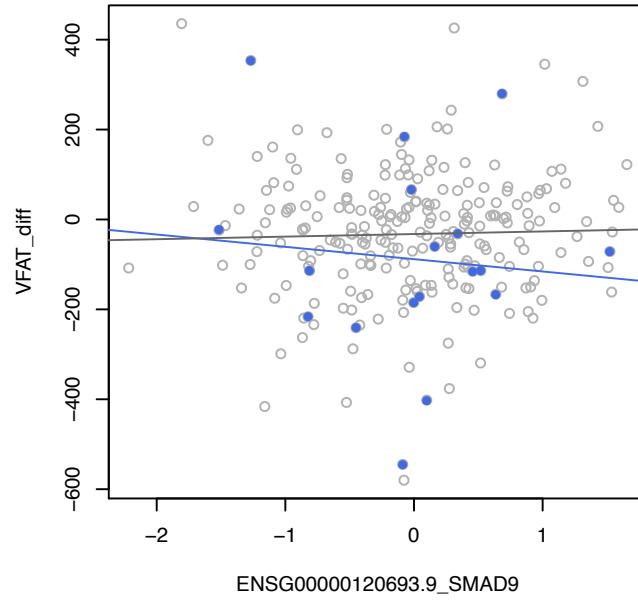

**p=0.476242177497893**

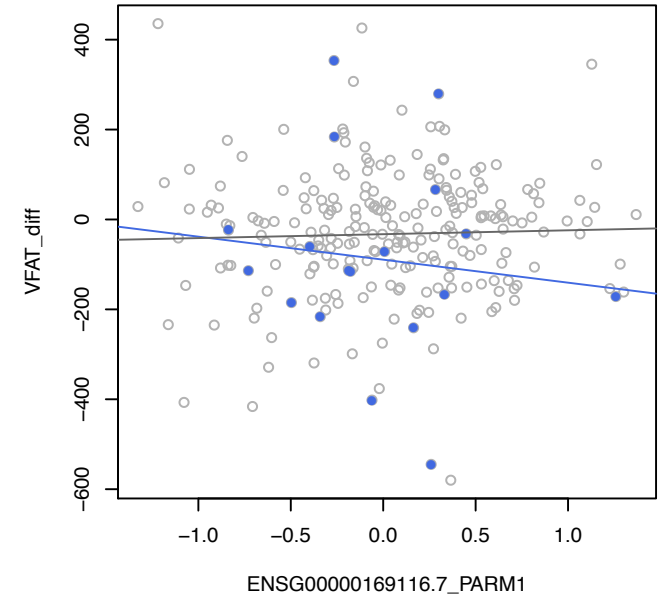

**p=0.00517170419112345**

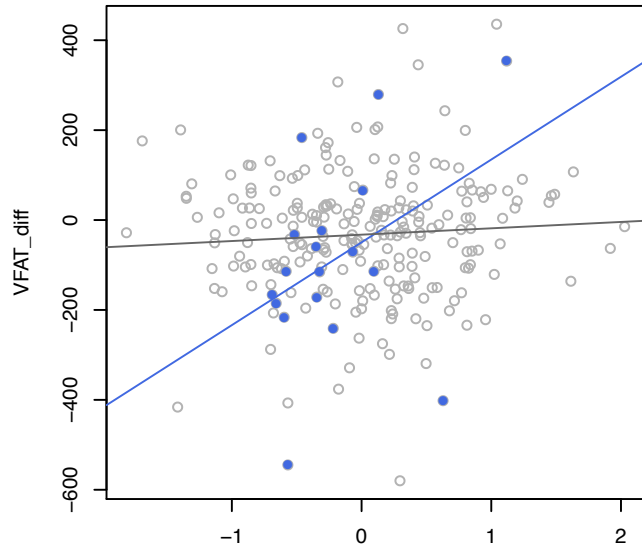

ENSG00000154330.6\_PGM5

**p=0.505827264633541**

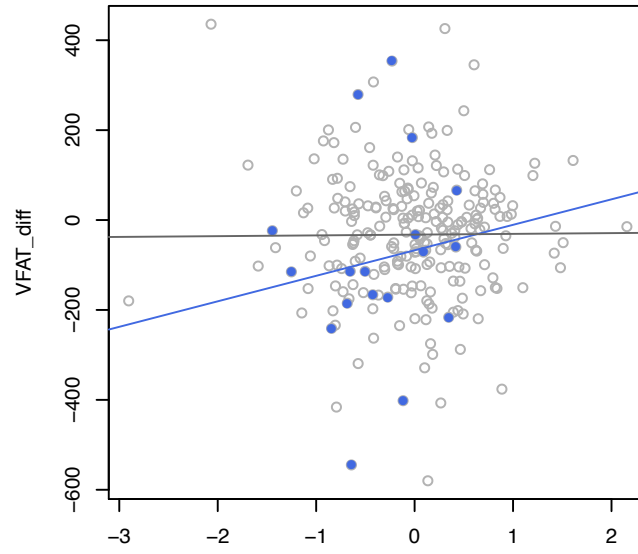

ENSG00000162430.12\_SEPN1

**p=0.00862595460385047**

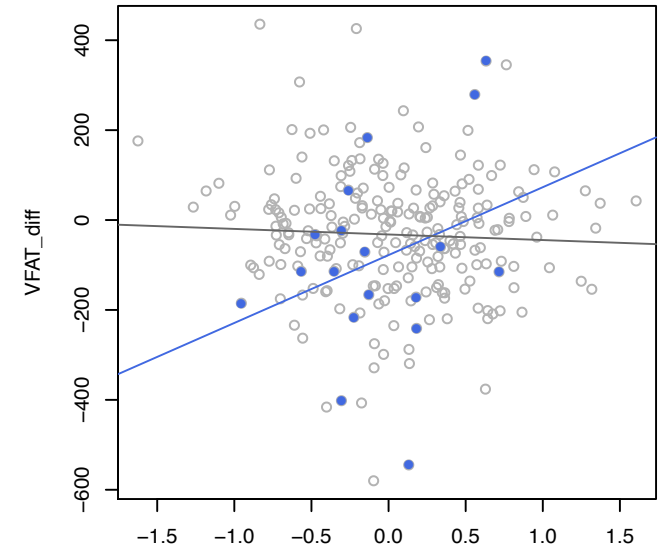

ENSG00000154721.9\_JAM2

**p=0.642368684121851**

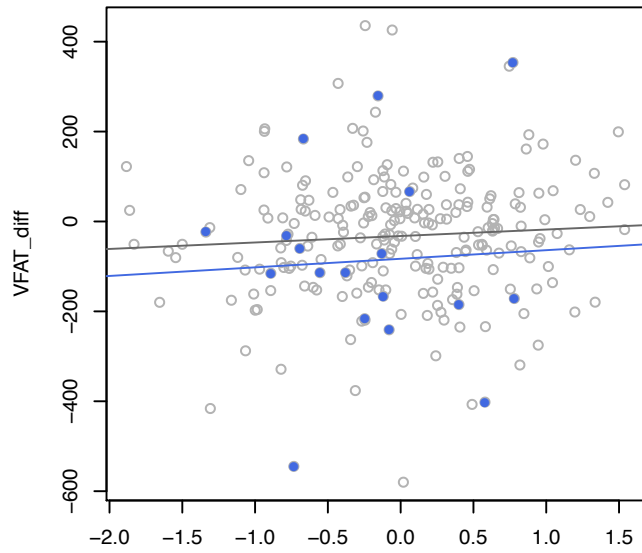

ENSG00000067840.6\_PDZD4

**p=0.653255374934628**

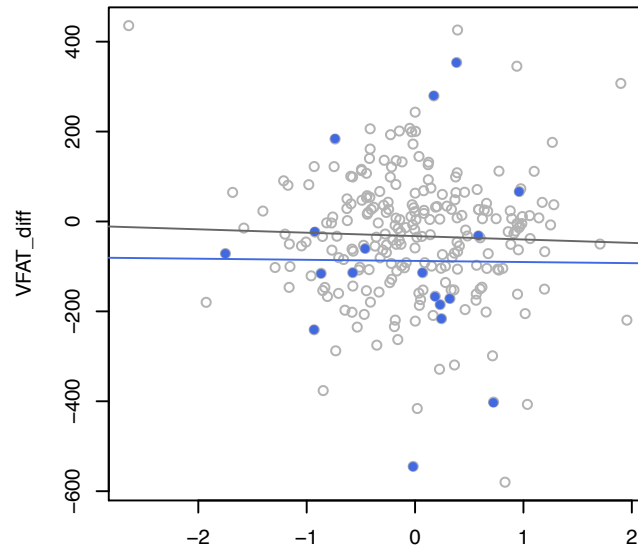

ENSG00000177303.4\_CASKIN2

**p=0.372773847065627**

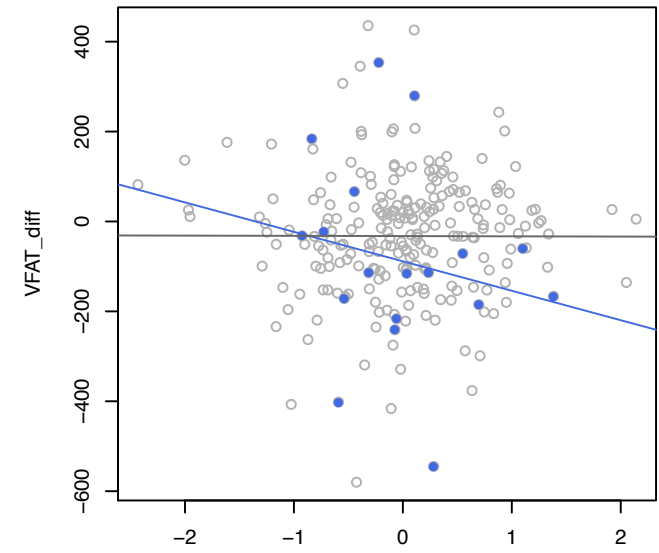

ENSG00000242676.1\_AL583842.8

**p=0.579340968671674**

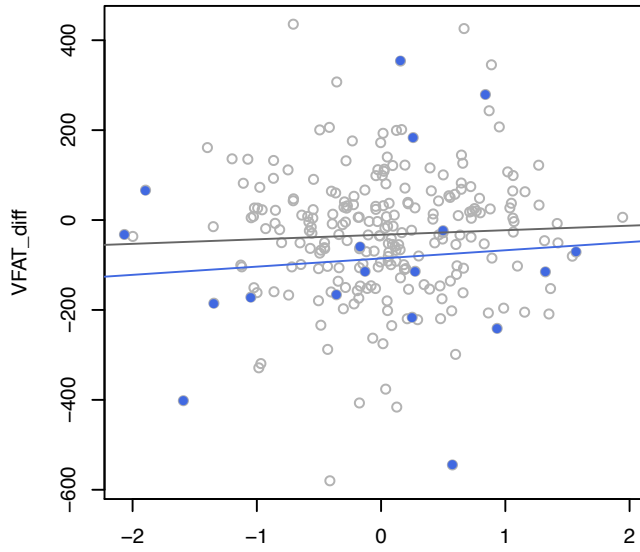

ENSG00000157404.10\_KIT

**p=0.635201067257111**

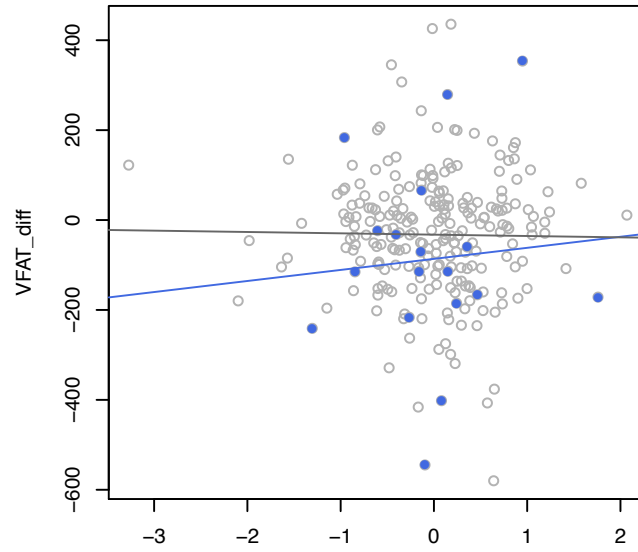

ENSG00000161544.4\_CYGB

**p=0.429405347955447**

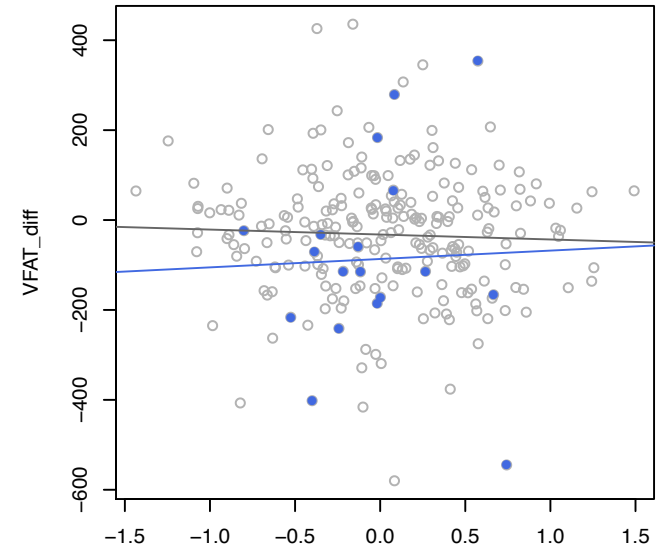

ENSG00000154065.9\_ANKRD29

**p=0.325055723011778**

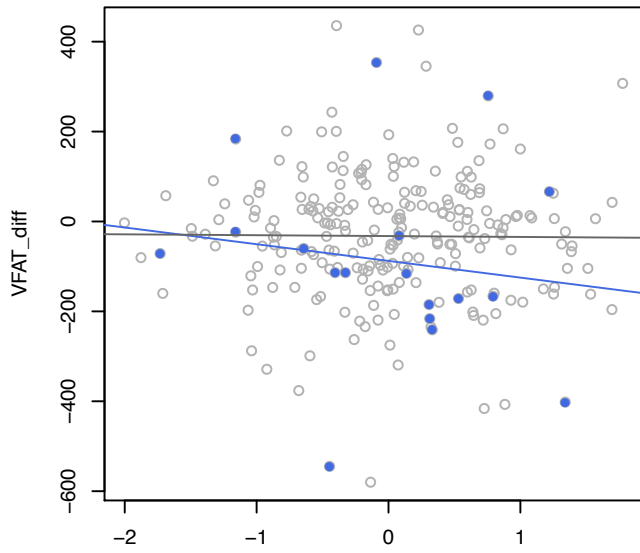

ENSG00000176907.3\_C8orf4

**p=0.0777429764278501**

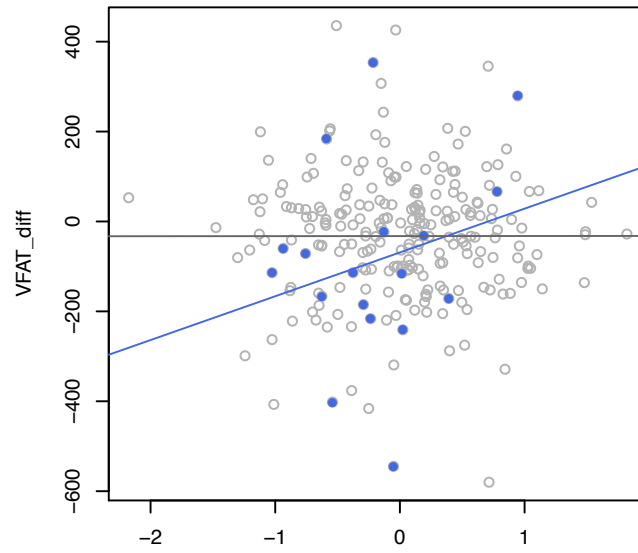

ENSG00000168032.4\_ENTPD3

**p=0.984210983845742**

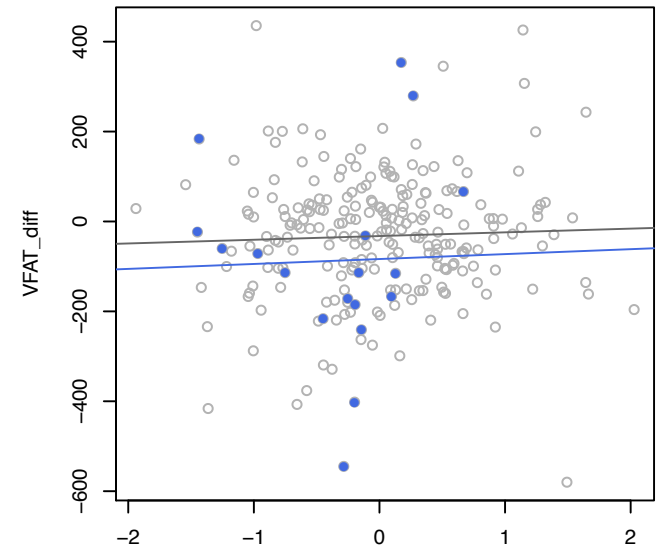

ENSG00000162367.6\_TAL1

**p=0.569012226861246**

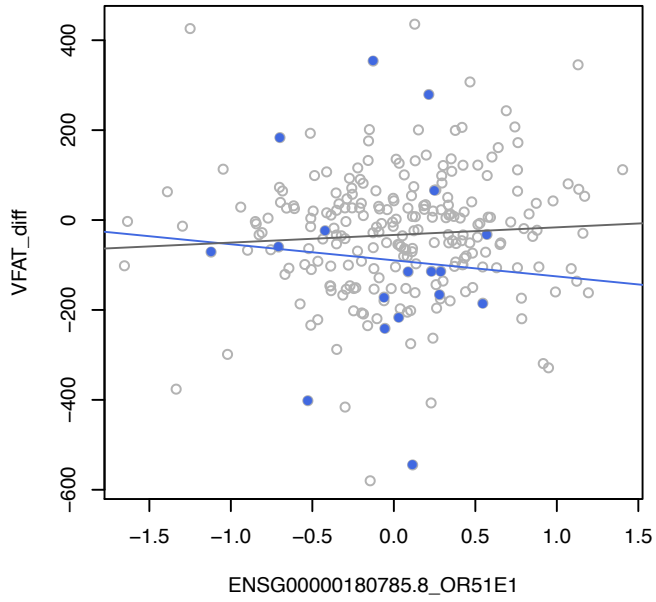

**p=0.555040633297546**

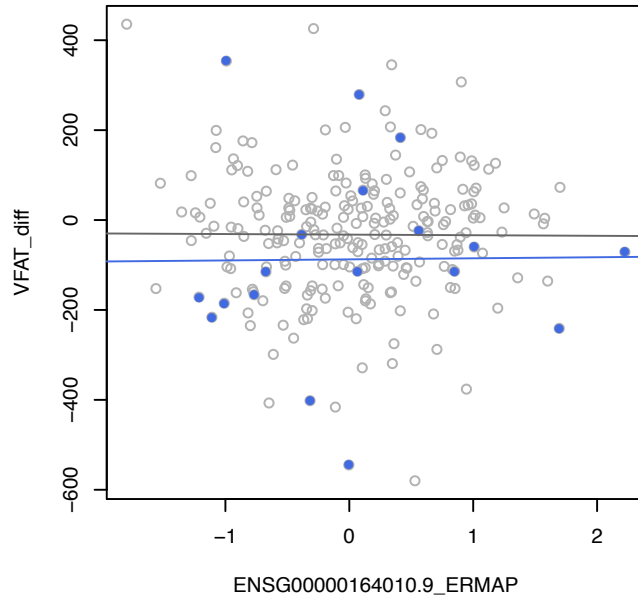

**p=0.381532165428878**

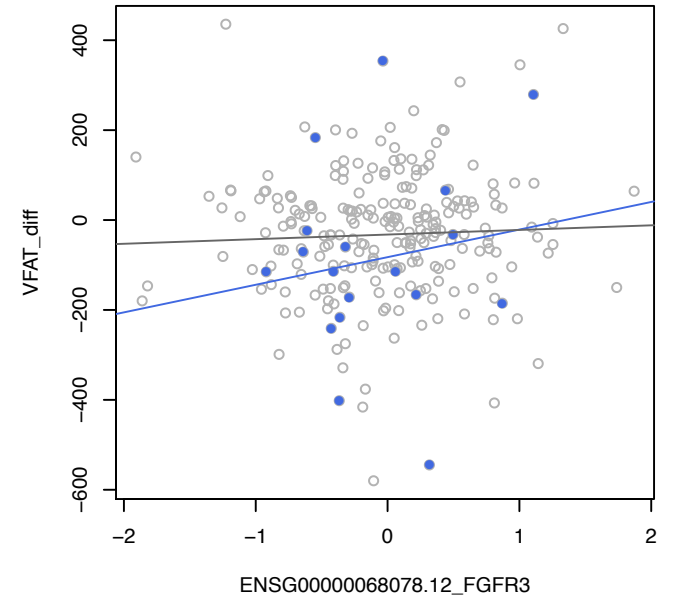

**p=0.105419141290361**

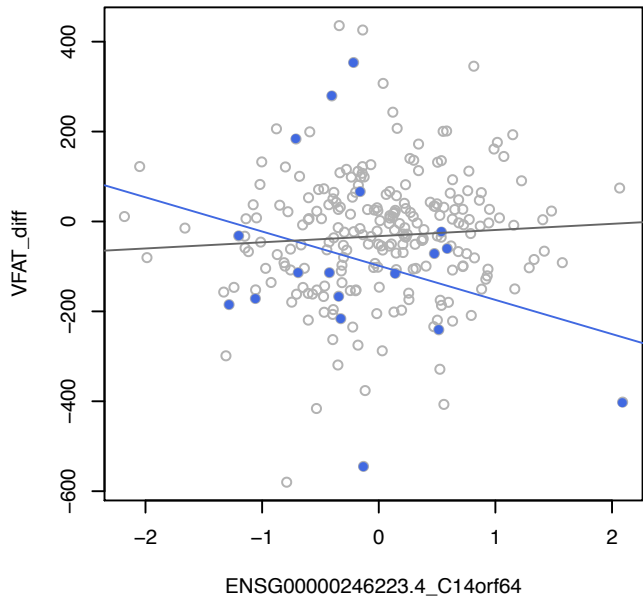

**p=0.670385349402685**

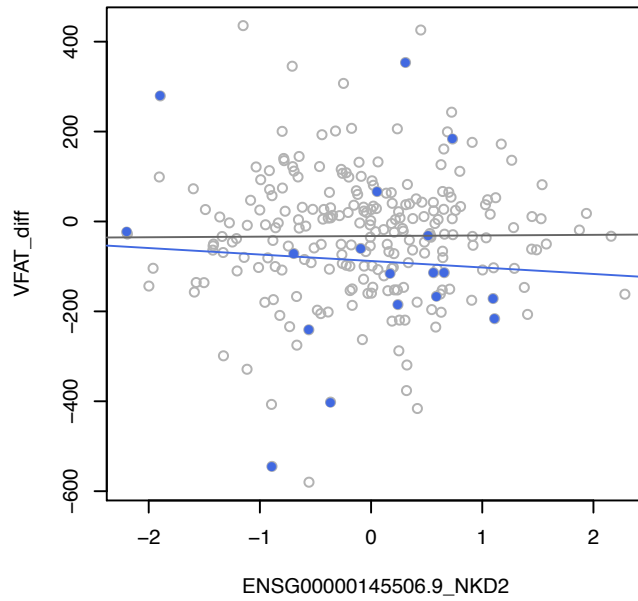

**p=0.620862561102685**

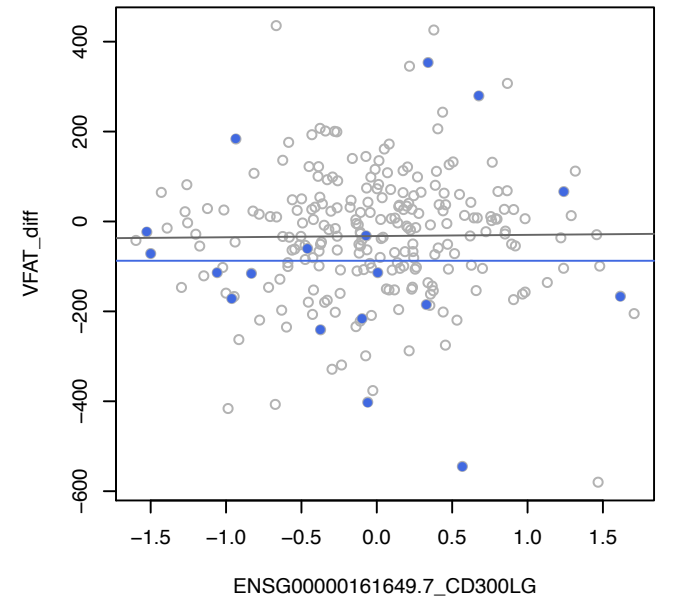

**p=0.312412966135531**

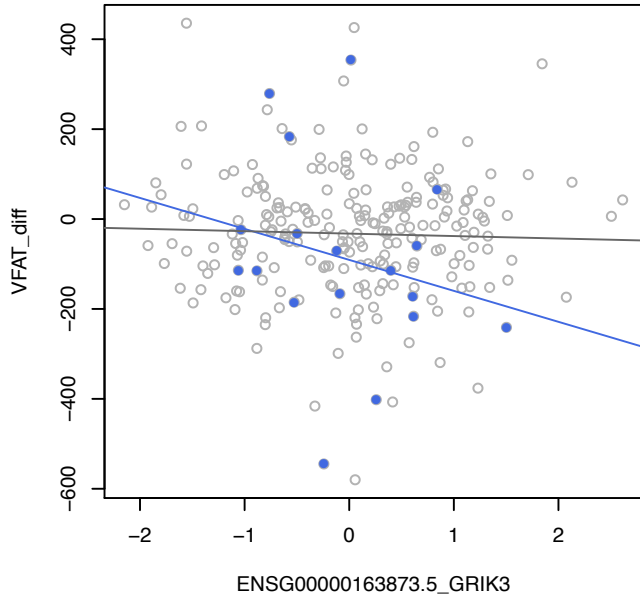

**p=0.919871687701038**

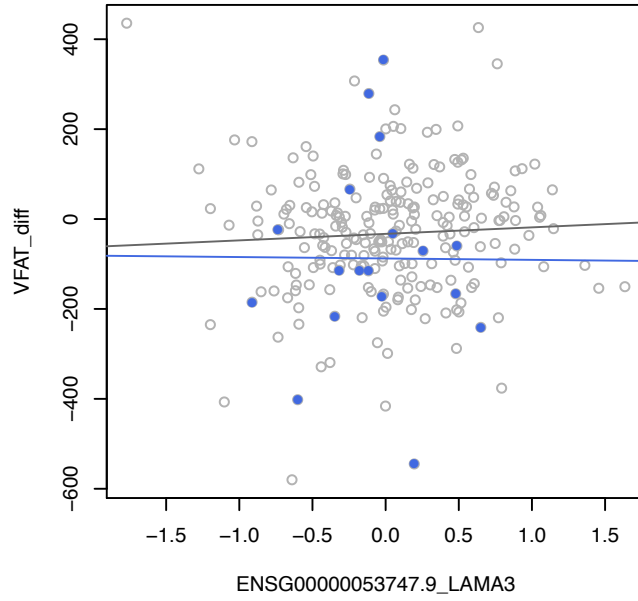

**p=0.744682429136545**

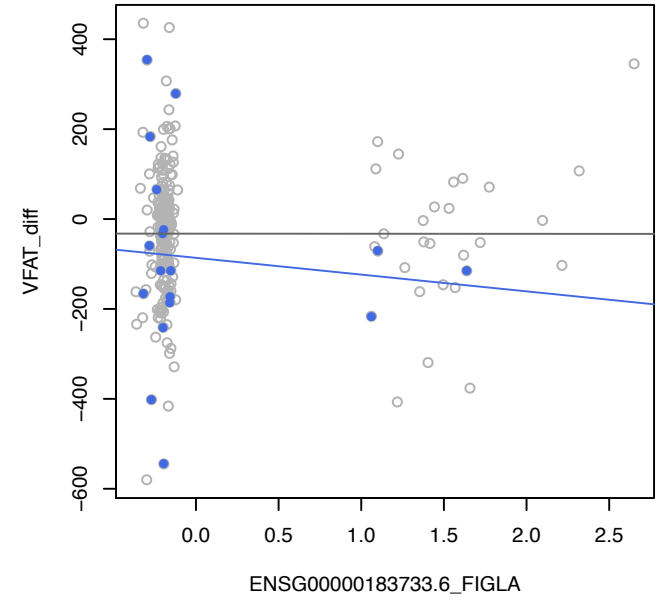

**p=0.0364074109571266**

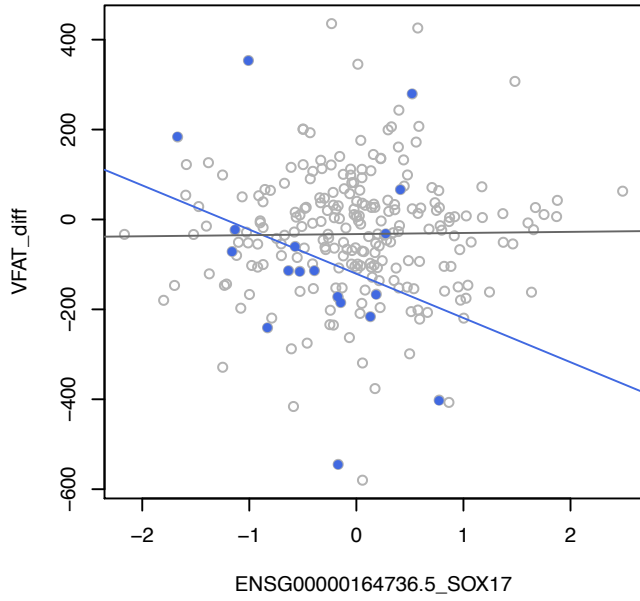

**p=0.978300353380422**

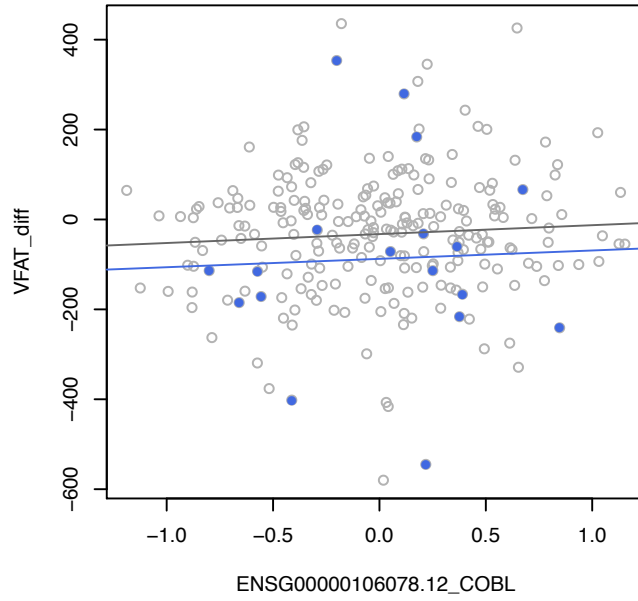

**p=0.114730209626054**

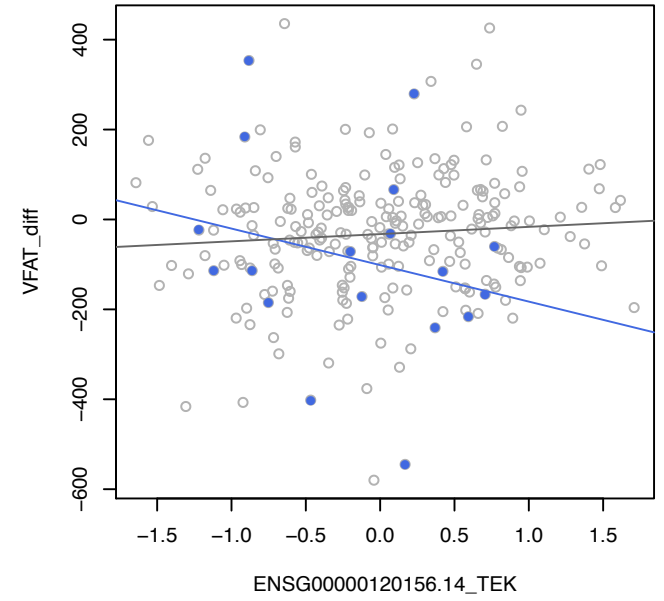

**p=0.238548564559927**

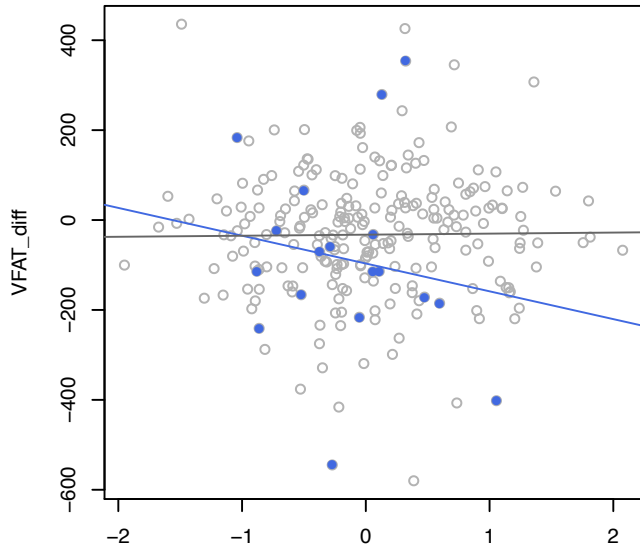

ENSG00000178726.5\_THBD

**p=0.0108032238526006**

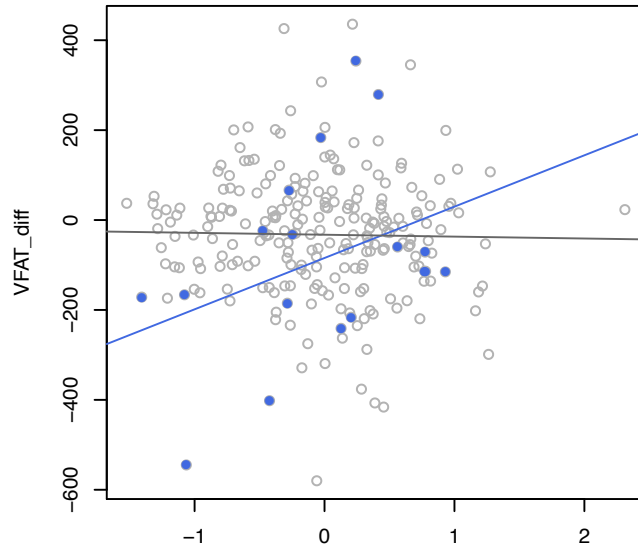

ENSG00000177675.4\_CD163L1

**p=0.324976896154227**

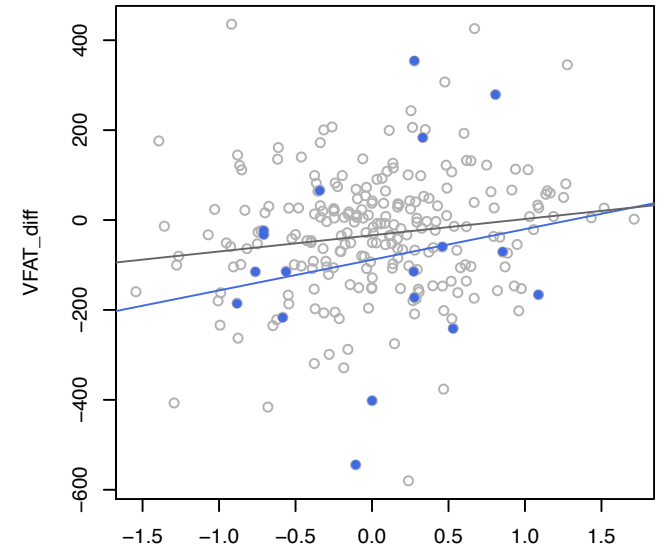

ENSG00000136828.13\_RALGPS1

**p=0.98773969285136**

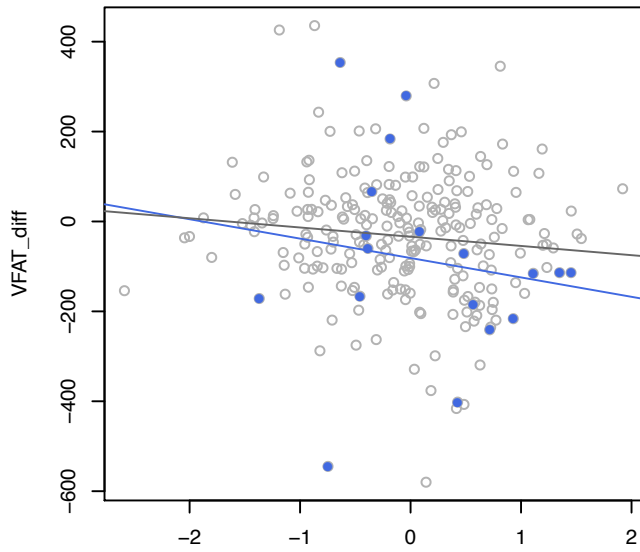

ENSG00000135914.4\_HTR2B

**p=0.973490696920575**

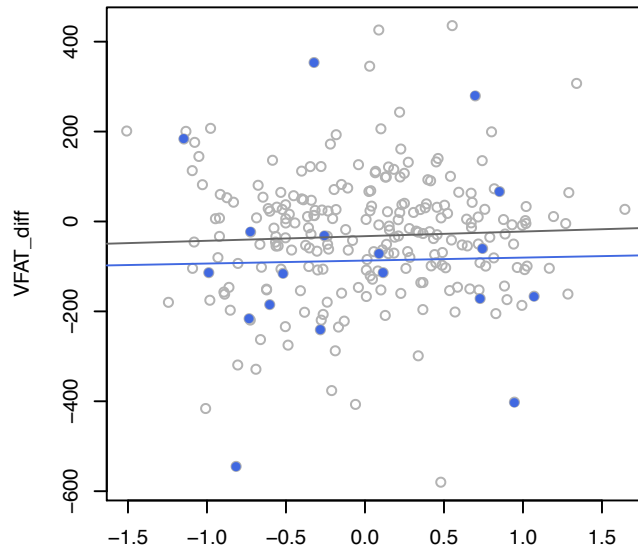

ENSG00000090530.5\_LEPREL1

**p=0.0161382514519024**

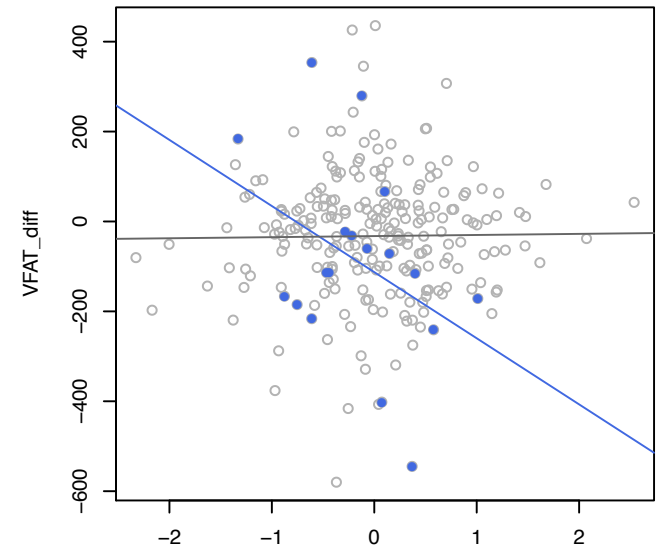

ENSG00000139874.5\_SSTR1

**p=0.489970074196403**

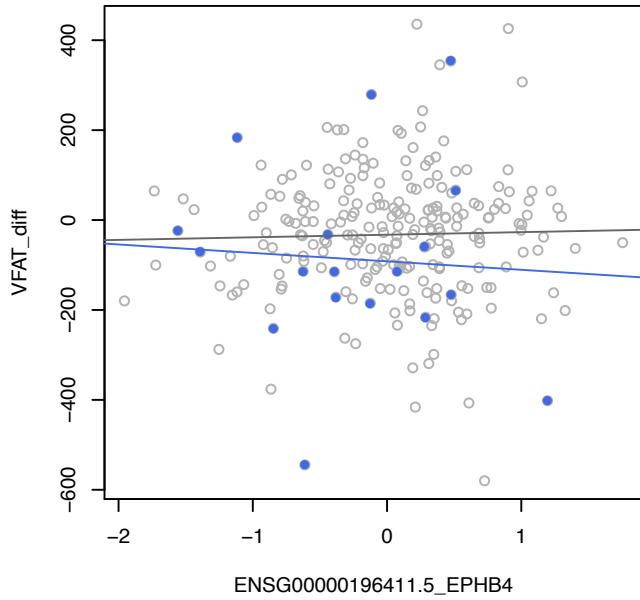

**p=0.0402538228743152**

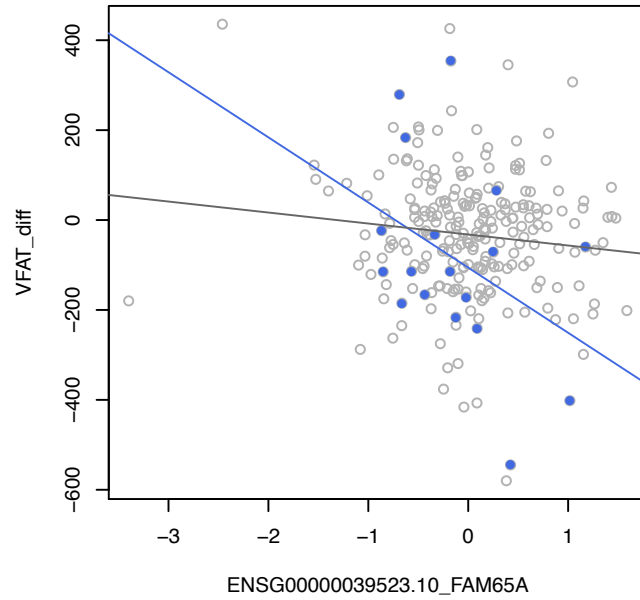

**p=0.309989413070512**

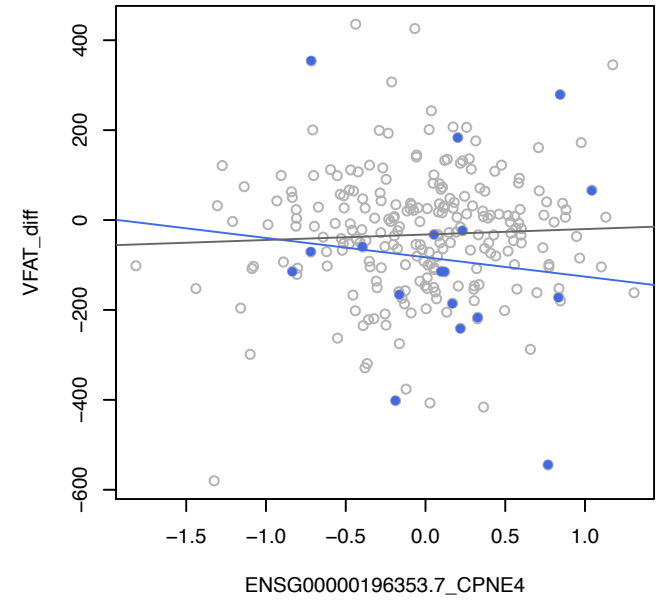

**p=0.860227824879606**

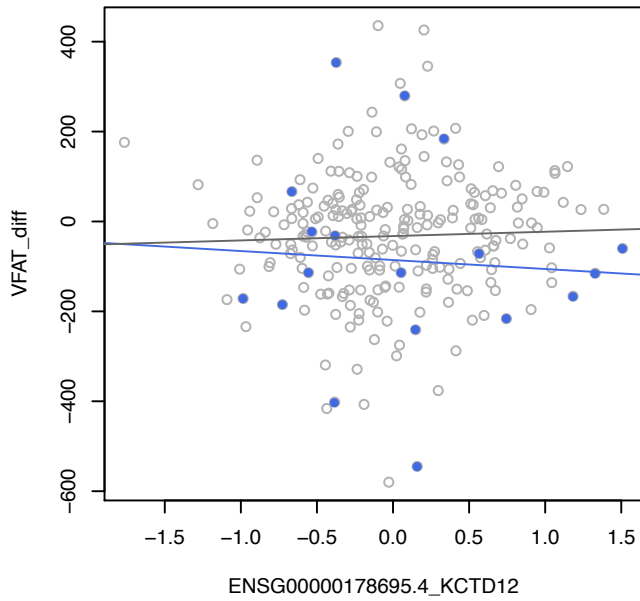

Supplement: 13148_2018_558_MOESM1_ESM.pdf [file 13148_2018_558_MOESM1_ESM.pdf]
